# Supplementary material for: Cross-species mapping of psychedelic gene expression reveals links to the 5HT2A receptor, cortical layers, and human accelerated regions
Source: Research Square preprint supplement (doi:10.21203/rs.3.rs-7625999/v1), 2025-10-03
Supplement: Supplementary file 1 [file fdba1cae99ed1f4f6f35e357.xlsx]

## Sheet: Sheet1
AUTHOR	EXPNUM	SPECIES	STRAIN	AVERAGEAGE	SEX	METHOD	DVMEASURE	EFFECTSIZE	DRUG	DOSE	VEHICLE	EVALDUR-ORIG	EVALDUR_HRS	EVALDUR_CAT	REGION_Specific	REGION_General	GENE	GENE_standardized	NCONTROL	NTX	CHANGEDIR	PVALUE	ALPHA	STATTEST	STATTESTVAL	VARIANCETYPE	VARIANCE	NOTE	DataVerified	FIDX	YEAR	PMID	DLOCATION	REFGENE	AGE-ORIG	METHOD-ORIG	DVMEASURE-ORIG	EFFECTSIZETYPE-redundant_with_DVMEASURE	REFGENE-ORIG	DRUG-ORIG	DOSE-ORIG	GROUPCOMP	GENE_label_AHBA
Nichols	5	rat	sprague-dawley	nr	male	rnasepro	%control	120	lsd	1.0	saline	45	0.75	acute	prefrontal-cortex	cortical prefrontal	Arc	arc	4	4	increase	plt0.05	0.05	t-test	nr	SEM	nr	tx=4 independent rats. effectsize eyeballed		14	2003	12654518	main	cyclophilin	nr	rnase-protection-assay	percent-expressed-compared-to-baseline		cyclophilin	lsd	1.0	bs-vehicle	Arc
Nichols	5	rat	sprague-dawley	nr	male	rnasepro	%control	200	lsd	1.0	saline	45	0.75	acute	prefrontal-cortex	cortical prefrontal	cFos	cfos	4	4	increase	plt0.05	0.05	t-test	nr	SEM	nr	tx=4 independent rats. effectsize eyeballed		16	2003	12654518	main	cyclophilin	nr	rnase-protection-assay	percent-expressed-compared-to-baseline		cyclophilin	lsd	1.0	bs-vehicle	fos
Nichols	5	rat	sprague-dawley	nr	male	rnasepro	%control	150	lsd	1.0	saline	45	0.75	acute	prefrontal-cortex	cortical prefrontal	IkB	ikb	4	4	increase	plt0.05	0.05	t-test	nr	SEM	nr	tx=4 independent rats. effectsize eyeballed		18	2003	12654518	main	cyclophilin	nr	rnase-protection-assay	percent-expressed-compared-to-baseline		cyclophilin	lsd	1.0	bs-vehicle	nfkbia
Nichols	5	rat	sprague-dawley	nr	male	rnasepro	%control	150	lsd	1.0	saline	45	0.75	acute	prefrontal-cortex	cortical prefrontal	Krox-20	krox20	4	4	increase	plt0.05	0.05	t-test	nr	SEM	nr	tx=4 independent rats. effectsize eyeballed		20	2003	12654518	main	cyclophilin	nr	rnase-protection-assay	percent-expressed-compared-to-baseline		cyclophilin	lsd	1.0	bs-vehicle	egr2
Nichols	5	rat	sprague-dawley	nr	male	rnasepro	%control	130	lsd	1.0	saline	45	0.75	acute	prefrontal-cortex	cortical prefrontal	Nor1	nor1	4	4	increase	plt0.05	0.05	t-test	nr	SEM	nr	tx=4 independent rats. effectsize eyeballed		22	2003	12654518	main	cyclophilin	nr	rnase-protection-assay	percent-expressed-compared-to-baseline		cyclophilin	lsd	1.0	bs-vehicle	nr4a3
González-Maeso	1	mouse	129Sv	10	male	rtqpcr	FC	1.46	doi	2	saline	60	1	acute	SSCx	cortical sensory	ar1	ar1	12	21	increase	plt-0.001	0.0038-tt	t-test	nr	SEM	0.05	Table did not define what variation was but other figures used SEM for variation. I could not find what ar1 gene was.	X	6	2003	14523084	table1	multiple	8-12-weeks	rt-qpcr	normalized-fold-change	FC-wrt-RefVeh	actb,gapdh,rps3,mapkapk5	doi	2.0	bs-vehicle	ar
González-Maeso	7	mouse	129S6/SvEv	10	male	rtqpcr	FC	1.44	doi	2	saline	60	1	acute	somatosensory-cortex	cortical sensory	ar1	ar1	6–19	6–19	increase	plt-0.001	0.003	t-test	nr	SEM	0.04	none		7	2007	17270739	TableS.3	multiple	8-12-weeks	rt-qpcr	FC-wr-vehicle	FC-wr-vehicle	β-actin, gapdh, ribosomal protein s3, and mapkapk-5	doi	2.0	bs-vehicle	ar
González-Maeso	7	mouse	129S6/SvEv	10	male	rtqpcr	FC	0.89	dom	4	saline	60	1	acute	somatosensory-cortex	cortical sensory	ar1	ar1	6–19	6–19	increase	plt-0.003	0.003	t-test	nr	SEM	0.02	none		8	2007	17270739	TableS.3	multiple	8-12-weeks	rt-qpcr	FC-wr-vehicle	FC-wr-vehicle	β-actin, gapdh, ribosomal protein s3, and mapkapk-5	DOM	4.0	bs-vehicle	ar
González-Maeso	7	mouse	129S6/SvEv	10	male	rtqpcr	FC	1.21	dob	1	saline	60	1	acute	somatosensory-cortex	cortical sensory	ar1	ar1	6–19	6–19	increase	plt-0.003	0.003	t-test	nr	SEM	0.03	none		9	2007	17270739	TableS.3	multiple	8-12-weeks	rt-qpcr	FC-wr-vehicle	FC-wr-vehicle	β-actin, gapdh, ribosomal protein s3, and mapkapk-5	DOB	1.0	bs-vehicle	ar
González-Maeso	1	mouse	129Sv	10	male	rtqpcr	FC	2.31	doi	2	saline	60	1	acute	SSCx	cortical sensory	c-fos	cfos	12	21	increase	plt-0.001	0.0038-tt	t-test	nr	SEM	0.18	Table did not define what variation was but other figures used SEM for variation	X	3	2003	14523084	table1	multiple	8-12-weeks	rt-qpcr	normalized-fold-change	FC-wrt-RefVeh	actb,gapdh,rps3,mapkapk5	doi	2.0	bs-vehicle	fos
González-Maeso	1	mouse	129Sv	10	male	rtqpcr	FC	2.11	lsd	0.24	saline	60	1	acute	SSCx	cortical sensory	c-fos	cfos	12	12	increase	plt-0.001	0.0038-tt	t-test	nr	SEM	0.15	Table did not define what variation was but other figures used SEM for variation.	X	13	2003	14523084	table1	multiple	8-12-weeks	rt-qpcr	normalized-fold-change	FC-wrt-RefVeh	actb,gapdh,rps3,mapkapk5	lsd	0.24	bs-vehicle	fos
González-Maeso	3	mouse	129S6/SvEv	10	male	rtqpcr	FC	2.5	lsd	0.24	DMSO-and-saline	60	1	acute	SSC	cortical sensory	c-fos	cfos	5-8	5-8	increase	plt-0.001	0.05	F-stat	nr	SEM	0.1	Effect size was relative to control injected with saline. Effect size and SEM was eyeballed from graph		14	2007	17270739	fig.4	multiple	8–12-weeks-old	rt-qpcr	FC-wr-vehicle	FC-wr-vehicle	β-actin, gapdh, ribosomal protein s3, and mapkapk-5	LSD	0.24	bs-vehicle	fos
González-Maeso	4	mouse	129S6/SvEv	10	male	rtqpcr	FC	2.9	lsd	0.24	DMSO-and-saline	60	1	acute	SSC	cortical sensory	c-fos	cfos	6-8	6-8	increase	plt-0.001	0.05	F-stat	nr	SEM	0.3	Effect size and variation eyeballed from graph		17	2007	17270739	fig.5	multiple	8-12-weeks	rt-qpcr	FC-wr-vehicle	FC-wr-Vehicle	β-actin, gapdh, ribosomal protein s3, and mapkapk-5	LSD	0.24	bs-vehicle	fos
González-Maeso	5	mouse	129S6/SvEv	10	male	rtqpcr	FC	3.56	lsd	0.24	DMSO-and-saline	60	1	acute	olfactory-bulb	subcortical	c-fos	cfos	6	6	increase	plt-0.001	0.05	t-test	nr	SEM	0.49	none		20	2007	17270739	TableS.10	multiple	8-12-weeks	rt-qpcr	FC-wr-vehicle	FC-wr-Vehicle	β-actin, gapdh, ribosomal protein s3, and mapkapk-5	LSD	0.24	bs-vehicle	fos
González-Maeso	5	mouse	129S6/SvEv	10	male	rtqpcr	FC	4.27	lsd	0.24	DMSO-and-saline	60	1	acute	prefrontal-cortex	cortical prefrontal	c-fos	cfos	6	6	increase	plt-0.001	0.05-tt	t-test	nr	SEM	0.22	none		21	2007	17270739	TableS.10	multiple	8-12-weeks	rt-qpcr	FC-wr-vehicle	FC-wr-vehicle	β-actin, gapdh, ribosomal protein s3, and mapkapk-5	LSD	0.24	bs-vehicle	fos
González-Maeso	5	mouse	129S6/SvEv	10	male	rtqpcr	FC	1.65	lsd	0.24	DMSO-and-saline	60	1	acute	cingulate-cortex	cortical prefrontal	c-fos	cfos	6	6	increase	plt-0.01	0.05	t-test	nr	SEM	0.18	none		22	2007	17270739	TableS.10	multiple	8-12-weeks	rt-qpcr	FC-wr-vehicle	FC-wr-vehicle	β-actin, gapdh, ribosomal protein s3, and mapkapk-5	LSD	0.24	bs-vehicle	fos
González-Maeso	5	mouse	129S6/SvEv	10	male	rtqpcr	FC	2.47	lsd	0.24	DMSO-and-saline	60	1	acute	somatosensory-cortex	cortical sensory	c-fos	cfos	6	6	increase	plt-0.001	0.05	t-test	nr	SEM	0.14	none		23	2007	17270739	TableS.10	multiple	8-12-weeks	rt-qpcr	FC-wr-vehicle	FC-wr-vehicle	β-actin, gapdh, ribosomal protein s3, and mapkapk-5	LSD	0.24	bs-vehicle	fos
González-Maeso	5	mouse	129S6/SvEv	10	male	rtqpcr	FC	1.63	lsd	0.24	DMSO-and-saline	60	1	acute	thalamus	subcortical	c-fos	cfos	6	6	increase	plt-0.01	0.05	t-test	nr	SEM	0.08	none		24	2007	17270739	TableS.10	multiple	8-12-weeks	rt-qpcr	FC-wr-vehicle	FC-wr-vehicle	β-actin, gapdh, ribosomal protein s3, and mapkapk-5	LSD	0.24	bs-vehicle	fos
González-Maeso	5	mouse	129S6/SvEv	10	male	rtqpcr	FC	5.09	lsd	0.24	DMSO-and-saline	60	1	acute	cerebellum	subcortical	c-fos	cfos	6	6	increase	plt-0.001	0.05	t-test	nr	SEM	0.98	none		25	2007	17270739	TableS.10	multiple	8-12-weeks	rt-qpcr	FC-wr-vehicle	FC-wr-vehicle	β-actin, gapdh, ribosomal protein s3, and mapkapk-5	LSD	0.24	bs-vehicle	fos
González-Maeso	5	mouse	129S6/SvEv	10	male	rtqpcr	FC	4.75	lsd	0.24	DMSO-and-saline	60	1	acute	piriform-cortex	subcortical	c-fos	cfos	6	6	increase	plt-0.01	0.05	t-test	nr	SEM	1.01	none		30	2007	17270739	TableS.10	multiple	8-12-weeks	rt-qpcr	FC-wr-vehicle	FC-wr-vehicle	β-actin, gapdh, ribosomal protein s3, and mapkapk-5	LSD	0.24	bs-vehicle	fos
González-Maeso	7	mouse	129S6/SvEv	10	male	rtqpcr	FC	2.33	doi	2	saline	60	1	acute	somatosensory-cortex	cortical sensory	c-fos	cfos	6–19	6–19	increase	plt-0.001	0.003	t-test	nr	SEM	0.17	none		31	2007	17270739	TableS.3	multiple	8-12-weeks	rt-qpcr	FC-wr-vehicle	FC-wr-vehicle	β-actin, gapdh, ribosomal protein s3, and mapkapk-5	doi	2.0	bs-vehicle	fos
González-Maeso	7	mouse	129S6/SvEv	10	male	rtqpcr	FC	2.20	mescaline	20	saline	60	1	acute	somatosensory-cortex	cortical sensory	c-fos	cfos	6–19	6–19	increase	plt-0.001	0.003	t-test	nr	SEM	0.11	none		32	2007	17270739	TableS.3	multiple	8-12-weeks	rt-qpcr	FC-wr-vehicle	FC-wr-vehicle	β-actin, gapdh, ribosomal protein s3, and mapkapk-5	Mescaline	20.0	bs-vehicle	fos
González-Maeso	7	mouse	129S6/SvEv	10	male	rtqpcr	FC	2.14	lsd	0.24	DMSO-and-saline	60	1	acute	somatosensory-cortex	cortical sensory	c-fos	cfos	6–19	6–19	increase	plt-0.001	0.003	t-test	nr	SEM	0.11	none		33	2007	17270739	TableS.3	multiple	8-12-weeks	rt-qpcr	FC-wr-vehicle	FC-wr-vehicle	β-actin, gapdh, ribosomal protein s3, and mapkapk-5	LSD	0.24	bs-vehicle	fos
González-Maeso	7	mouse	129S6/SvEv	10	male	rtqpcr	FC	2.54	psilocin	2	distilled-water	60	1	acute	somatosensory-cortex	cortical sensory	c-fos	cfos	6–19	6–19	increase	plt-0.001	0.003	t-test	nr	SEM	0.16	none		34	2007	17270739	TableS.3	multiple	8-12-weeks	rt-qpcr	FC-wr-vehicle	FC-wr-vehicle	β-actin, gapdh, ribosomal protein s3, and mapkapk-5	Psilocin	2.0	bs-vehicle	fos
González-Maeso	7	mouse	129S6/SvEv	10	male	rtqpcr	FC	2.12	dom	4	saline	60	1	acute	somatosensory-cortex	cortical sensory	c-fos	cfos	6–19	6–19	increase	plt-0.001	0.003	t-test	nr	SEM	0.13	none		35	2007	17270739	TableS.3	multiple	8-12-weeks	rt-qpcr	FC-wr-vehicle	FC-wr-vehicle	β-actin, gapdh, ribosomal protein s3, and mapkapk-5	DOM	4.0	bs-vehicle	fos
González-Maeso	7	mouse	129S6/SvEv	10	male	rtqpcr	FC	3.04	dob	1	saline	60	1	acute	somatosensory-cortex	cortical sensory	c-fos	cfos	6–19	6–19	increase	plt-0.001	0.003	t-test	nr	SEM	0.17	none		36	2007	17270739	TableS.3	multiple	8-12-weeks	rt-qpcr	FC-wr-vehicle	FC-wr-vehicle	β-actin, gapdh, ribosomal protein s3, and mapkapk-5	DOB	1.0	bs-vehicle	fos
González-Maeso	1	mouse	129Sv	10	male	rtqpcr	FC	11.3	doi	2	saline	60	1	acute	SSCx	cortical sensory	egr-1	egr1	12	21	increase	plt-0.001	0.0038-tt	t-test	nr	SEM	2.72	Table did not define what variation was but other figures used SEM for variation	X	1	2003	14523084	table1	multiple	8-12-weeks	rt-qpcr	normalized-fold-change	FC-wrt-RefVeh	actb, gapdh, rps3, mapkapk5	doi	2.0	bs-vehicle	egr1
González-Maeso	1	mouse	129Sv	10	male	rtqpcr	FC	4.34	lsd	0.24	saline	60	1	acute	SSCx	cortical sensory	egr-1	egr1	12	12	increase	plt-0.001	0.0038-tt	t-test	nr	SEM	1.2	Table did not define what variation was but other figures used SEM for variation.	X	11	2003	14523084	table1	multiple	8-12-weeks	rt-qpcr	normalized-fold-change	FC-wrt-RefVeh	actb,gapdh,rps3,mapkapk5	lsd	0.24	bs-vehicle	egr1
González-Maeso	3	mouse	129S6/SvEv	10	male	rtqpcr	FC	1.8	lsd	0.24	DMSO-and-saline	60	1	acute	SSC	cortical sensory	egr-1	egr1	5-8	5-8	increase	plt-0.001	0.05	F-stat	nr	SEM	0.2	Effect size and variation eyeballed from graph		15	2007	17270739	fig.4	multiple	8-12-weeks	rt-qpcr	FC-wr-vehicle	FC-wr-Vehicle	β-actin, gapdh, ribosomal protein s3, and mapkapk-5	LSD	0.24	bs-vehicle	egr1
González-Maeso	4	mouse	129S6/SvEv	10	male	rtqpcr	FC	2.0	lsd	0.24	DMSO-and-saline	60	1	acute	SSC	cortical sensory	egr-1	egr1	6-8	6-8	increase	plt-0.001	0.05	F-stat	nr	SEM	0.2	Effect size and variation eyeballed from graph		18	2007	17270739	fig.5	multiple	8-12-weeks	rt-qpcr	FC-wr-vehicle	FC-wr-Vehicle	β-actin, gapdh, ribosomal protein s3, and mapkapk-5	LSD	0.24	bs-vehicle	egr1
González-Maeso	5	mouse	129S6/SvEv	10	male	rtqpcr	FC	2.30	lsd	0.24	DMSO-and-saline	60	1	acute	olfactory-bulb	subcortical	egr-1	egr1	6	6	increase	plt-0.001	0.05	t-test	nr	SEM	0.24	none		26	2007	17270739	TableS.10	multiple	8-12-weeks	rt-qpcr	FC-wr-vehicle	FC-wr-vehicle	β-actin, gapdh, ribosomal protein s3, and mapkapk-5	LSD	0.24	bs-vehicle	egr1
González-Maeso	5	mouse	129S6/SvEv	10	male	rtqpcr	FC	2.08	lsd	0.24	DMSO-and-saline	60	1	acute	prefrontal-cortex	cortical prefrontal	egr-1	egr1	6	6	increase	plt-0.001	0.05	t-test	nr	SEM	0.11	none		27	2007	17270739	TableS.10	multiple	8-12-weeks	rt-qpcr	FC-wr-vehicle	FC-wr-vehicle	β-actin, gapdh, ribosomal protein s3, and mapkapk-5	LSD	0.24	bs-vehicle	egr1
González-Maeso	5	mouse	129S6/SvEv	10	male	rtqpcr	FC	1.44	lsd	0.24	DMSO-and-saline	60	1	acute	cingulate-cortex	cortical prefrontal	egr-1	egr1	6	6	increase	plt-0.01	0.05	t-test	nr	SEM	0.08	none		28	2007	17270739	TableS.10	multiple	8-12-weeks	rt-qpcr	FC-wr-vehicle	FC-wr-vehicle	β-actin, gapdh, ribosomal protein s3, and mapkapk-5	LSD	0.24	bs-vehicle	egr1
González-Maeso	5	mouse	129S6/SvEv	10	male	rtqpcr	FC	1.78	lsd	0.24	DMSO-and-saline	60	1	acute	piriform-cortex	subcortical	egr-1	egr1	6	6	increase	plt-0.001	0.05	t-test	nr	SEM	0.1	none		31	2007	17270739	TableS.10	multiple	8-12-weeks	rt-qpcr	FC-wr-vehicle	FC-wr-vehicle	β-actin, gapdh, ribosomal protein s3, and mapkapk-5	LSD	0.24	bs-vehicle	egr1
González-Maeso	5	mouse	129S6/SvEv	10	male	rtqpcr	FC	1.88	lsd	0.24	DMSO-and-saline	60	1	acute	somatosensory-cortex	cortical sensory	egr-1	egr1	6	6	increase	plt-0.001	0.05	t-test	nr	SEM	0.09	none		29	2007	17270739	TableS.10	multiple	8-12-weeks	rt-qpcr	FC-wr-vehicle	FC-wr-vehicle	β-actin, gapdh, ribosomal protein s3, and mapkapk-5	LSD	0.24	bs-vehicle	egr1
González-Maeso	7	mouse	129S6/SvEv	10	male	rtqpcr	FC	9.86	doi	2	saline	60	1	acute	somatosensory-cortex	cortical sensory	egr-1	egr1	6–19	6–19	increase	plt-0.001	0.003-tt	t-test	nr	SEM	1.98	none		43	2007	17270739	TableS.3	multiple	8–12 weeks	rt-qpcr	FC-wr-vehicle	FC-wr-vehicle	β-actin, gapdh, ribosomal protein s3, and mapkapk-5	doi	2.0	bs-vehicle	egr1
González-Maeso	7	mouse	129S6/SvEv	10	male	rtqpcr	FC	1.31	mescaline	20	saline	60	1	acute	somatosensory-cortex	cortical sensory	egr-1	egr1	6–19	6–19	increase	plt-0.003	0.003	t-test	nr	SEM	0.04	none		44	2007	17270739	TableS.3	multiple	8-12-weeks	rt-qpcr	FC-wr-vehicle	FC-wr-vehicle	β-actin, gapdh, ribosomal protein s3, and mapkapk-5	Mescaline	20.0	bs-vehicle	egr1
González-Maeso	7	mouse	129S6/SvEv	10	male	rtqpcr	FC	2.62	lsd	0.24	DMSO-and-saline	60	1	acute	somatosensory-cortex	cortical sensory	egr-1	egr1	6–19	6–19	increase	plt-0.001	0.003	t-test	nr	SEM	0.34	none		45	2007	17270739	TableS.3	multiple	8-12-weeks	rt-qpcr	FC-wr-vehicle	FC-wr-vehicle	β-actin, gapdh, ribosomal protein s3, and mapkapk-5	LSD	0.24	bs-vehicle	egr1
González-Maeso	7	mouse	129S6/SvEv	10	male	rtqpcr	FC	2.24	psilocin	2	distilled-water	60	1	acute	somatosensory-cortex	cortical sensory	egr-1	egr1	6–19	6–19	increase	plt-0.001	0.003	t-test	nr	SEM	0.18	none		46	2007	17270739	TableS.3	multiple	8-12-weeks	rt-qpcr	FC-wr-vehicle	FC-wr-vehicle	β-actin, gapdh, ribosomal protein s3, and mapkapk-5	Psilocin	2.0	bs-vehicle	egr1
González-Maeso	7	mouse	129S6/SvEv	10	male	rtqpcr	FC	1.35	dom	4	saline	60	1	acute	somatosensory-cortex	cortical sensory	egr-1	egr1	6–19	6–19	increase	plt-0.001	0.003	t-test	nr	SEM	0.07	none		47	2007	17270739	TableS.3	multiple	8-12-weeks	rt-qpcr	FC-wr-vehicle	FC-wr-vehicle	β-actin, gapdh, ribosomal protein s3, and mapkapk-5	DOM	4.0	bs-vehicle	egr1
González-Maeso	7	mouse	129S6/SvEv	10	male	rtqpcr	FC	1.65	dob	1	saline	60	1	acute	somatosensory-cortex	cortical sensory	egr-1	egr1	6–19	6–19	increase	plt-0.001	0.003	t-test	nr	SEM	0.21	none		48	2007	17270739	TableS.3	multiple	8-12-weeks	rt-qpcr	FC-wr-vehicle	FC-wr-vehicle	β-actin, gapdh, ribosomal protein s3, and mapkapk-5	DOB	1.0	bs-vehicle	egr1
González-Maeso	1	mouse	129Sv	10	male	rtqpcr	FC	3.30	doi	2	saline	60	1	acute	SSCx	cortical sensory	egr-2	egr2	12	21	increase	plt-0.001	0.0038-tt	t-test	nr	SEM	0.69	Table did not define what variation was but other figures used SEM for variation	X	2	2003	14523084	table1	multiple	8-12-weeks	rt-qpcr	normalized-fold-change	FC-wrt-RefVeh	actb,gapdh,rps3,mapkapk5	doi	2.0	bs-vehicle	egr2
González-Maeso	1	mouse	129Sv	10	male	rtqpcr	FC	4.12	lsd	0.24	saline	60	1	acute	SSCx	cortical sensory	egr-2	egr2	12	12	increase	plt-0.001	0.0038-tt	t-test	nr	SEM	1.13	Table did not define what variation was but other figures used SEM for variation.	X	12	2003	14523084	table1	multiple	8-12-weeks	rt-qpcr	normalized-fold-change	FC-wrt-RefVeh	actb,gapdh,rps3,mapkapk5	lsd	0.24	bs-vehicle	egr2
González-Maeso	3	mouse	129S6/SvEv	10	male	rtqpcr	FC	3.3	lsd	0.24	DMSO-and-saline	60	1	acute	SSC	cortical sensory	egr-2	egr2	5-8	5-8	increase	plt-0.001	0.05	F-stat	nr	SEM	0.4	Effect size and variation eyeballed from graph		16	2007	17270739	fig.4	multiple	8-12-weeks	rt-qpcr	FC-wr-vehicle	FC-wr-Vehicle	β-actin, gapdh, ribosomal protein s3, and mapkapk-5	LSD	0.24	bs-vehicle	egr2
González-Maeso	4	mouse	129S6/SvEv	10	male	rtqpcr	FC	3.6	lsd	0.24	DMSO-and-saline	60	1	acute	SSC	cortical sensory	egr-2	egr2	6-8	6-8	increase	plt-0.001	0.05	F-stat	nr	SEM	0.3	Effect size and variation eyeballed from graph		19	2007	17270739	fig.5	multiple	8-12-weeks	rt-qpcr	FC-wr-vehicle	FC-wr-Vehicle	β-actin, gapdh, ribosomal protein s3, and mapkapk-5	LSD	0.24	bs-vehicle	egr2
González-Maeso	5	mouse	129S6/SvEv	10	male	rtqpcr	FC	2.38	lsd	0.24	DMSO-and-saline	60	1	acute	olfactory-bulb	subcortical	egr-2	egr2	6	6	increase	plt-0.01	0.05	t-test	nr	SEM	0.23	none		32	2007	17270739	TableS.10	multiple	8-12-weeks	rt-qpcr	FC-wr-vehicle	FC-wr-vehicle	β-actin, gapdh, ribosomal protein s3, and mapkapk-5	LSD	0.24	bs-vehicle	egr2
González-Maeso	5	mouse	129S6/SvEv	10	male	rtqpcr	FC	5.67	lsd	0.24	DMSO-and-saline	60	1	acute	prefrontal-cortex	cortical prefrontal	egr-2	egr2	6	6	increase	plt-0.001	0.05	t-test	nr	SEM	0.64	none		33	2007	17270739	TableS.10	multiple	8-12-weeks	rt-qpcr	FC-wr-vehicle	FC-wr-vehicle	β-actin, gapdh, ribosomal protein s3, and mapkapk-5	LSD	0.24	bs-vehicle	egr2
González-Maeso	5	mouse	129S6/SvEv	10	male	rtqpcr	FC	2.1	lsd	0.24	DMSO-and-saline	60	1	acute	cingulate-cortex	cortical prefrontal	egr-2	egr2	6	6	increase	plt-0.01	0.05	t-test	nr	SEM	0.18	none		34	2007	17270739	TableS.10	multiple	8-12-weeks	rt-qpcr	FC-wr-vehicle	FC-wr-vehicle	β-actin, gapdh, ribosomal protein s3, and mapkapk-5	LSD	0.24	bs-vehicle	egr2
González-Maeso	5	mouse	129S6/SvEv	10	male	rtqpcr	FC	3.28	lsd	0.24	DMSO-and-saline	60	1	acute	somatosensory-cortex	cortical sensory	egr-2	egr2	6	6	increase	plt-0.001	0.05	t-test	nr	SEM	0.3	none		35	2007	17270739	TableS.10	multiple	8-12-weeks	rt-qpcr	FC-wr-vehicle	FC-wr-vehicle	β-actin, gapdh, ribosomal protein s3, and mapkapk-5	LSD	0.24	bs-vehicle	egr2
González-Maeso	5	mouse	129S6/SvEv	10	male	rtqpcr	FC	4.07	lsd	0.24	DMSO-and-saline	60	1	acute	piriform-cortex	subcortical	egr-2	egr2	6	6	increase	plt-0.001	0.05	t-test	nr	SEM	0.26	none		36	2007	17270739	TableS.10	multiple	8-12-weeks	rt-qpcr	FC-wr-vehicle	FC-wr-vehicle	β-actin, gapdh, ribosomal protein s3, and mapkapk-5	LSD	0.24	bs-vehicle	egr2
González-Maeso	7	mouse	129S6/SvEv	10	male	rtqpcr	FC	3.40	doi	2	saline	60	1	acute	somatosensory-cortex	cortical sensory	egr-2	egr2	6–19	6–19	increase	plt-0.001	0.003	t-test	nr	SEM	0.47	none		37	2007	17270739	TableS.3	multiple	8-12-weeks	rt-qpcr	FC-wr-vehicle	FC-wr-vehicle	β-actin, gapdh, ribosomal protein s3, and mapkapk-5	doi	2.0	bs-vehicle	egr2
González-Maeso	7	mouse	129S6/SvEv	10	male	rtqpcr	FC	3.24	mescaline	20	saline	60	1	acute	somatosensory-cortex	cortical sensory	egr-2	egr2	6–19	6–19	increase	plt-0.001	0.003	t-test	nr	SEM	0.19	none		38	2007	17270739	TableS.3	multiple	8-12-weeks	rt-qpcr	FC-wr-vehicle	FC-wr-vehicle	β-actin, gapdh, ribosomal protein s3, and mapkapk-5	Mescaline	20.0	bs-vehicle	egr2
González-Maeso	7	mouse	129S6/SvEv	10	male	rtqpcr	FC	3.56	lsd	0.24	DMSO-and-saline	60	1	acute	somatosensory-cortex	cortical sensory	egr-2	egr2	6–19	6–19	increase	plt-0.001	0.003	t-test	nr	SEM	0.18	none		39	2007	17270739	TableS.3	multiple	8-12-weeks	rt-qpcr	FC-wr-vehicle	FC-wr-vehicle	β-actin, gapdh, ribosomal protein s3, and mapkapk-5	LSD	0.24	bs-vehicle	egr2
González-Maeso	7	mouse	129S6/SvEv	10	male	rtqpcr	FC	3.12	psilocin	2	distilled-water	60	1	acute	somatosensory-cortex	cortical sensory	egr-2	egr2	6–19	6–19	increase	plt-0.001	0.003	t-test	nr	SEM	0.19	none		40	2007	17270739	TableS.3	multiple	8-12-weeks	rt-qpcr	FC-wr-vehicle	FC-wr-vehicle	β-actin, gapdh, ribosomal protein s3, and mapkapk-5	Psilocin	2.0	bs-vehicle	egr2
González-Maeso	7	mouse	129S6/SvEv	10	male	rtqpcr	FC	3.05	dom	4	saline	60	1	acute	somatosensory-cortex	cortical sensory	egr-2	egr2	6–19	6–19	increase	plt-0.001	0.003	t-test	nr	SEM	0.4	none		41	2007	17270739	TableS.3	multiple	8-12-weeks	rt-qpcr	FC-wr-vehicle	FC-wr-vehicle	β-actin, gapdh, ribosomal protein s3, and mapkapk-5	DOM	4.0	bs-vehicle	egr2
González-Maeso	7	mouse	129S6/SvEv	10	male	rtqpcr	FC	3.03	dob	1	saline	60	1	acute	somatosensory-cortex	cortical sensory	egr-2	egr2	6–19	6–19	increase	plt-0.001	0.003	t-test	nr	SEM	0.27	none		42	2007	17270739	TableS.3	multiple	8-12-weeks	rt-qpcr	FC-wr-vehicle	FC-wr-vehicle	β-actin, gapdh, ribosomal protein s3, and mapkapk-5	DOB	1.0	bs-vehicle	egr2
González-Maeso	1	mouse	129Sv	10	male	rtqpcr	FC	0.74	doi	2	saline	60	1	acute	SSCx	cortical sensory	egr-3	egr3	12	21	decrease	plt-0.001	0.0038-tt	t-test	nr	SEM	0.07	Table did not define what variation was but other figures used SEM for variation.	X	10	2003	14523084	table1	multiple	8-12-weeks	rt-qpcr	normalized-fold-change	FC-wrt-RefVeh	actb,gapdh,rps3,mapkapk5	doi	2.0	bs-vehicle	egr3
González-Maeso	7	mouse	129S6/SvEv	10	male	rtqpcr	FC	0.75	doi	2	saline	60	1	acute	somatosensory-cortex	cortical sensory	egr-3	egr3	6–19	6–19	increase	plt-0.001	0.003	t-test	nr	SEM	0.05	none		11	2007	17270739	TableS.3	multiple	8-12-weeks	rt-qpcr	FC-wr-vehicle	FC-wr-vehicle	β-actin, gapdh, ribosomal protein s3, and mapkapk-5	doi	2.0	bs-vehicle	egr3
González-Maeso	7	mouse	129S6/SvEv	10	male	rtqpcr	FC	0.84	dom	4	saline	60	1	acute	somatosensory-cortex	cortical sensory	egr-3	egr3	6–19	6–19	increase	plt-0.003	0.003	t-test	nr	SEM	0.03	none		12	2007	17270739	TableS.3	multiple	8-12-weeks	rt-qpcr	FC-wr-vehicle	FC-wr-vehicle	β-actin, gapdh, ribosomal protein s3, and mapkapk-5	DOM	4.0	bs-vehicle	egr3
González-Maeso	7	mouse	129S6/SvEv	10	male	rtqpcr	FC	0.89	dob	1	saline	60	1	acute	somatosensory-cortex	cortical sensory	egr-3	egr3	6–19	6–19	increase	plt-0.003	0.003	t-test	nr	SEM	0.04	none		13	2007	17270739	TableS.3	multiple	8-12-weeks	rt-qpcr	FC-wr-vehicle	FC-wr-vehicle	β-actin, gapdh, ribosomal protein s3, and mapkapk-5	DOB	1.0	bs-vehicle	egr3
González-Maeso	7	mouse	129S6/SvEv	10	male	rtqpcr	FC	2.43	dom	4	saline	60	1	acute	somatosensory-cortex	cortical sensory	erk1	erk1	6–19	6–19	increase	plt-0.003	0.003	t-test	nr	SEM	0.16	none		14	2007	17270739	TableS.3	multiple	8-12-weeks	rt-qpcr	FC-wr-vehicle	FC-wr-vehicle	β-actin, gapdh, ribosomal protein s3, and mapkapk-5	DOM	4.0	bs-vehicle	MAPK3
González-Maeso	7	mouse	129S6/SvEv	10	male	rtqpcr	FC	0.74	dob	1	saline	60	1	acute	somatosensory-cortex	cortical sensory	ets1	ets1	6–19	6–19	increase	plt-0.003	0.003	t-test	nr	SEM	0.03	none		15	2007	17270739	TableS.3	multiple	8-12-weeks	rt-qpcr	FC-wr-vehicle	FC-wr-vehicle	β-actin, gapdh, ribosomal protein s3, and mapkapk-5	DOB	1.0	bs-vehicle	ets1
González-Maeso	7	mouse	129S6/SvEv	10	male	rtqpcr	FC	1.62	psilocin	2	distilled-water	60	1	acute	somatosensory-cortex	cortical sensory	fra1	fra1	6–19	6–19	increase	plt-0.003	0.003	t-test	nr	SEM	0.14	none		16	2007	17270739	TableS.3	multiple	8-12-weeks	rt-qpcr	FC-wr-vehicle	FC-wr-vehicle	β-actin, gapdh, ribosomal protein s3, and mapkapk-5	Psilocin	2.0	bs-vehicle	fosl1
González-Maeso	1	mouse	129Sv	10	male	rtqpcr	FC	0.79	lsd	0.24	saline	60	1	acute	SSCx	cortical sensory	glut4	glut4	12	12	decrease	plt-0.0038	0.0038-tt	t-test	nr	SEM	0.7	Table did not define what variation was but other figures used SEM for variation.	X	18	2003	14523084	table1	multiple	8-12-weeks	rt-qpcr	normalized-fold-change	FC-wrt-RefVeh	actb,gapdh,rps3,mapkapk5	lsd	0.24	bs-vehicle	glut4
González-Maeso	7	mouse	129S6/SvEv	10	male	rtqpcr	FC	0.79	lsd	0.24	DMSO-and-saline	60	1	acute	somatosensory-cortex	cortical sensory	glut-4	glut4	6–19	6–19	increase	plt-0.003	0.003	t-test	nr	SEM	0.03	none		19	2007	17270739	TableS.3	multiple	8-12-weeks	rt-qpcr	FC-wr-vehicle	FC-wr-vehicle	β-actin, gapdh, ribosomal protein s3, and mapkapk-5	LSD	0.24	bs-vehicle	glut4
González-Maeso	7	mouse	129S6/SvEv	10	male	rtqpcr	FC	0.89	dom	4	saline	60	1	acute	somatosensory-cortex	cortical sensory	glut4	glut4	6–19	6–19	increase	plt-0.003	0.003	t-test	nr	SEM	0.02	none		20	2007	17270739	TableS.3	multiple	8-12-weeks	rt-qpcr	FC-wr-vehicle	FC-wr-vehicle	β-actin, gapdh, ribosomal protein s3, and mapkapk-5	DOM	4.0	bs-vehicle	glut4
González-Maeso	7	mouse	129S6/SvEv	10	male	rtqpcr	FC	0.77	dob	1	saline	60	1	acute	somatosensory-cortex	cortical sensory	glut4	glut4	6–19	6–19	increase	plt-0.001	0.003	t-test	nr	SEM	0.04	none		21	2007	17270739	TableS.3	multiple	8-12-weeks	rt-qpcr	FC-wr-vehicle	FC-wr-vehicle	β-actin, gapdh, ribosomal protein s3, and mapkapk-5	DOB	1.0	bs-vehicle	glut4
González-Maeso	1	mouse	129Sv	10	male	rtqpcr	FC	1.21	lsd	0.24	saline	60	1	acute	SSCx	cortical sensory	gpcr26	gpcr26	12	12	increase	plt-0.0038	0.0038-tt	t-test	nr	SEM	0.04	Table did not define what variation was but other figures used SEM for variation.	X	19	2003	14523084	table1	multiple	8-12-weeks	rt-qpcr	normalized-fold-change	FC-wrt-RefVeh	actb,gapdh,rps3,mapkapk5	lsd	0.24	bs-vehicle	gpr26
González-Maeso	7	mouse	129S6/SvEv	10	male	rtqpcr	FC	1.23	lsd	0.24	DMSO-and-saline	60	1	acute	somatosensory-cortex	cortical sensory	gpcr-26	gpcr26	6–19	6–19	increase	plt-0.001	0.003	t-test	nr	SEM	0.02	none		20	2007	17270739	TableS.3	multiple	8-12-weeks	rt-qpcr	FC-wr-vehicle	FC-wr-vehicle	β-actin, gapdh, ribosomal protein s3, and mapkapk-5	LSD	0.24	bs-vehicle	gpr26
González-Maeso	7	mouse	129S6/SvEv	10	male	rtqpcr	FC	1.32	psilocin	2	distilled-water	60	1	acute	somatosensory-cortex	cortical sensory	gpcr26	gpcr26	6–19	6–19	increase	plt-0.001	0.003	t-test	nr	SEM	0.05	none		21	2007	17270739	TableS.3	multiple	8-12-weeks	rt-qpcr	FC-wr-vehicle	FC-wr-vehicle	β-actin, gapdh, ribosomal protein s3, and mapkapk-5	Psilocin	2.0	bs-vehicle	gpr26
González-Maeso	1	mouse	129Sv	10	male	rtqpcr	FC	1.35	lsd	0.24	saline	60	1	acute	SSCx	cortical sensory	ikba	ikba	12	12	increase	plt-0.001	0.0038-tt	t-test	nr	SEM	0.09	Table did not define what variation was but other figures used SEM for variation.	X	15	2003	14523084	table1	multiple	8-12-weeks	rt-qpcr	normalized-fold-change	FC-wrt-RefVeh	actb,gapdh,rps3,mapkapk5	lsd	0.24	bs-vehicle	nfkbia
González-Maeso	7	mouse	129S6/SvEv	10	male	rtqpcr	FC	1.57	doi	2	saline	60	1	acute	somatosensory-cortex	cortical sensory	I-κBα	iκbα	6–19	6–19	increase	plt-0.001	0.003	t-test	nr	SEM	0.05	none		16	2007	17270739	TableS.3	multiple	8-12-weeks	rt-qpcr	FC-wr-vehicle	FC-wr-vehicle	β-actin, gapdh, ribosomal protein s3, and mapkapk-5	doi	2.0	bs-vehicle	nfkbia
González-Maeso	7	mouse	129S6/SvEv	10	male	rtqpcr	FC	1.44	mescaline	20	saline	60	1	acute	somatosensory-cortex	cortical sensory	I-κBα	iκbα	6–19	6–19	increase	plt-0.001	0.003	t-test	nr	SEM	0.04	none		17	2007	17270739	TableS.3	multiple	8-12-weeks	rt-qpcr	FC-wr-vehicle	FC-wr-vehicle	β-actin, gapdh, ribosomal protein s3, and mapkapk-5	Mescaline	20.0	bs-vehicle	nfkbia
González-Maeso	7	mouse	129S6/SvEv	10	male	rtqpcr	FC	1.41	lsd	0.24	DMSO-and-saline	60	1	acute	somatosensory-cortex	cortical sensory	I-κBα	iκbα	6–19	6–19	increase	plt-0.001	0.003	t-test	nr	SEM	0.08	none		18	2007	17270739	TableS.3	multiple	8-12-weeks	rt-qpcr	FC-wr-vehicle	FC-wr-vehicle	β-actin, gapdh, ribosomal protein s3, and mapkapk-5	LSD	0.24	bs-vehicle	nfkbia
González-Maeso	7	mouse	129S6/SvEv	10	male	rtqpcr	FC	1.56	psilocin	2	distilled-water	60	1	acute	somatosensory-cortex	cortical sensory	I-κBα	iκbα	6–19	6–19	increase	plt-0.001	0.003	t-test	nr	SEM	0.05	none		19	2007	17270739	TableS.3	multiple	8-12-weeks	rt-qpcr	FC-wr-vehicle	FC-wr-vehicle	β-actin, gapdh, ribosomal protein s3, and mapkapk-5	Psilocin	2.0	bs-vehicle	nfkbia
González-Maeso	7	mouse	129S6/SvEv	10	male	rtqpcr	FC	1.45	dom	4	saline	60	1	acute	somatosensory-cortex	cortical sensory	I-κBα	iκbα	6–19	6–19	increase	plt-0.001	0.003	t-test	nr	SEM	0.08	none		20	2007	17270739	TableS.3	multiple	8-12-weeks	rt-qpcr	FC-wr-vehicle	FC-wr-vehicle	β-actin, gapdh, ribosomal protein s3, and mapkapk-5	DOM	4.0	bs-vehicle	nfkbia
González-Maeso	7	mouse	129S6/SvEv	10	male	rtqpcr	FC	1.48	dob	1	saline	60	1	acute	somatosensory-cortex	cortical sensory	I-κBα	iκbα	6–19	6–19	increase	plt-0.001	0.003	t-test	nr	SEM	0.06	none		21	2007	17270739	TableS.3	multiple	8-12-weeks	rt-qpcr	FC-wr-vehicle	FC-wr-vehicle	β-actin, gapdh, ribosomal protein s3, and mapkapk-5	DOB	1.0	bs-vehicle	nfkbia
González-Maeso	1	mouse	129Sv	10	male	rtqpcr	FC	1.58	lsd	0.24	saline	60	1	acute	SSCx	cortical sensory	jun-B	junb	12	12	increase	plt-0.001	0.0038-tt	t-test	nr	SEM	0.1	Table did not define what variation was but other figures used SEM for variation.	X	17	2003	14523084	table1	multiple	8-12-weeks	rt-qpcr	normalized-fold-change	FC-wrt-RefVeh	actb,gapdh,rps3,mapkapk5	lsd	0.24	bs-vehicle	junB
González-Maeso	7	mouse	129S6/SvEv	10	male	rtqpcr	FC	1.76	lsd	0.24	DMSO-and-saline	60	1	acute	somatosensory-cortex	cortical sensory	jun-B	junb	6–19	6–19	increase	plt-0.001	0.003	t-test	nr	SEM	0.13	none		18	2007	17270739	TableS.3	multiple	8-12-weeks	rt-qpcr	FC-wr-vehicle	FC-wr-vehicle	β-actin, gapdh, ribosomal protein s3, and mapkapk-5	LSD	0.24	bs-vehicle	junB
González-Maeso	7	mouse	129S6/SvEv	10	male	rtqpcr	FC	2.08	psilocin	2	distilled-water	60	1	acute	somatosensory-cortex	cortical sensory	jun-B	junb	6–19	6–19	increase	plt-0.001	0.003	t-test	nr	SEM	0.08	none		19	2007	17270739	TableS.3	multiple	8-12-weeks	rt-qpcr	FC-wr-vehicle	FC-wr-vehicle	β-actin, gapdh, ribosomal protein s3, and mapkapk-5	Psilocin	2.0	bs-vehicle	junB
González-Maeso	7	mouse	129S6/SvEv	10	male	rtqpcr	FC	1.75	dom	4	saline	60	1	acute	somatosensory-cortex	cortical sensory	jun-B	junb	6–19	6–19	increase	plt-0.001	0.003	t-test	nr	SEM	0.13	none		20	2007	17270739	TableS.3	multiple	8-12-weeks	rt-qpcr	FC-wr-vehicle	FC-wr-vehicle	β-actin, gapdh, ribosomal protein s3, and mapkapk-5	DOM	4.0	bs-vehicle	junB
González-Maeso	7	mouse	129S6/SvEv	10	male	rtqpcr	FC	2.07	dob	1	saline	60	1	acute	somatosensory-cortex	cortical sensory	jun-B	junb	6–19	6–19	increase	plt-0.001	0.003	t-test	nr	SEM	0.13	none		21	2007	17270739	TableS.3	multiple	8-12-weeks	rt-qpcr	FC-wr-vehicle	FC-wr-vehicle	β-actin, gapdh, ribosomal protein s3, and mapkapk-5	DOB	1.0	bs-vehicle	junB
González-Maeso	1	mouse	129Sv	10	male	rtqpcr	FC	0.81	doi	2	saline	60	1	acute	SSCx	cortical sensory	lynB	lynb	12	21	decrease	plt-0.0038	0.0038-tt	t-test	nr	SEM	0.03	Table did not define what variation was but other figures used SEM for variation. I could not find what lynb gene was.	X	8	2003	14523084	table1	multiple	8-12-weeks	rt-qpcr	normalized-fold-change	FC-wrt-RefVeh	actb,gapdh,rps3,mapkapk5	doi	2.0	bs-vehicle	lyn
González-Maeso	7	mouse	129S6/SvEv	10	male	rtqpcr	FC	0.87	doi	2	saline	60	1	acute	somatosensory-cortex	cortical sensory	lynB	lynb	6–19	6–19	increase	plt-0.001	0.003	t-test	nr	SEM	0.02	none		9	2007	17270739	TableS.3	multiple	8-12-weeks	rt-qpcr	FC-wr-vehicle	FC-wr-vehicle	β-actin, gapdh, ribosomal protein s3, and mapkapk-5	doi	2.0	bs-vehicle	lyn
González-Maeso	7	mouse	129S6/SvEv	10	male	rtqpcr	FC	0.84	dom	4	saline	60	1	acute	somatosensory-cortex	cortical sensory	lynB	lynb	6–19	6–19	increase	plt-0.003	0.003	t-test	nr	SEM	0.02	none		10	2007	17270739	TableS.3	multiple	8-12-weeks	rt-qpcr	FC-wr-vehicle	FC-wr-vehicle	β-actin, gapdh, ribosomal protein s3, and mapkapk-5	DOM	4.0	bs-vehicle	lyn
González-Maeso	7	mouse	129S6/SvEv	10	male	rtqpcr	FC	0.33	dob	1	saline	60	1	acute	somatosensory-cortex	cortical sensory	lynB	lynb	6–19	6–19	increase	plt-0.001	0.003	t-test	nr	SEM	0.01	none		11	2007	17270739	TableS.3	multiple	8-12-weeks	rt-qpcr	FC-wr-vehicle	FC-wr-vehicle	β-actin, gapdh, ribosomal protein s3, and mapkapk-5	DOB	1.0	bs-vehicle	lyn
González-Maeso	1	mouse	129Sv	10	male	rtqpcr	FC	2.10	doi	2	saline	60	1	acute	SSCx	cortical sensory	n-10	n10	12	21	increase	plt-0.001	0.0038-tt	t-test	nr	SEM	0.42	Table did not define what variation was but other figures used SEM for variation. I also could not find what gene N-10 was but this is what it is called in the paper.	X	4	2003	14523084	table1	multiple	8-12-weeks	rt-qpcr	normalized-fold-change	FC-wrt-RefVeh	actb,gapdh,rps3,mapkapk5	doi	2.0	bs-vehicle	n10
González-Maeso	1	mouse	129Sv	10	male	rtqpcr	FC	1.70	lsd	0.24	saline	60	1	acute	SSCx	cortical sensory	N-10	n10	12	12	increase	plt-0.001	0.0038-tt	t-test	nr	SEM	0.16	Table did not define what variation was but other figures used SEM for variation. I could not find what gene -10 was.	X	14	2003	14523084	table1	multiple	8-12-weeks	rt-qpcr	normalized-fold-change	FC-wrt-RefVeh	actb,gapdh,rps3,mapkapk5	lsd	0.24	bs-vehicle	n10
González-Maeso	7	mouse	129S6/SvEv	10	male	rtqpcr	FC	2.22	doi	2	saline	60	1	acute	somatosensory-cortex	cortical sensory	N-10	n10	6–19	6–19	increase	plt-0.001	0.003	t-test	nr	SEM	0.29	none		15	2007	17270739	TableS.3	multiple	8-12-weeks	rt-qpcr	FC-wr-vehicle	FC-wr-vehicle	β-actin, gapdh, ribosomal protein s3, and mapkapk-5	doi	2.0	bs-vehicle	n10
González-Maeso	7	mouse	129S6/SvEv	10	male	rtqpcr	FC	2.28	mescaline	20	saline	60	1	acute	somatosensory-cortex	cortical sensory	N-10	n10	6–19	6–19	increase	plt-0.001	0.003	t-test	nr	SEM	0.11	none		16	2007	17270739	TableS.3	multiple	8-12-weeks	rt-qpcr	FC-wr-vehicle	FC-wr-vehicle	β-actin, gapdh, ribosomal protein s3, and mapkapk-5	Mescaline	20.0	bs-vehicle	n10
González-Maeso	7	mouse	129S6/SvEv	10	male	rtqpcr	FC	1.69	lsd	0.24	DMSO-and-saline	60	1	acute	somatosensory-cortex	cortical sensory	N-10	n10	6–19	6–19	increase	plt-0.001	0.003	t-test	nr	SEM	0.11	none		17	2007	17270739	TableS.3	multiple	8-12-weeks	rt-qpcr	FC-wr-vehicle	FC-wr-vehicle	β-actin, gapdh, ribosomal protein s3, and mapkapk-5	LSD	0.24	bs-vehicle	n10
González-Maeso	7	mouse	129S6/SvEv	10	male	rtqpcr	FC	1.76	psilocin	2	distilled-water	60	1	acute	somatosensory-cortex	cortical sensory	N-10	n10	6–19	6–19	increase	plt-0.003	0.003	t-test	nr	SEM	1.16	none		18	2007	17270739	TableS.3	multiple	8-12-weeks	rt-qpcr	FC-wr-vehicle	FC-wr-vehicle	β-actin, gapdh, ribosomal protein s3, and mapkapk-5	Psilocin	2.0	bs-vehicle	n10
González-Maeso	7	mouse	129S6/SvEv	10	male	rtqpcr	FC	1.44	dom	4	saline	60	1	acute	somatosensory-cortex	cortical sensory	N-10	n10	6–19	6–19	increase	plt-0.003	0.003	t-test	nr	SEM	0.11	none		19	2007	17270739	TableS.3	multiple	8-12-weeks	rt-qpcr	FC-wr-vehicle	FC-wr-vehicle	β-actin, gapdh, ribosomal protein s3, and mapkapk-5	DOM	4.0	bs-vehicle	n10
González-Maeso	7	mouse	129S6/SvEv	10	male	rtqpcr	FC	2.05	dob	1	saline	60	1	acute	somatosensory-cortex	cortical sensory	N-10	n10	6–19	6–19	increase	plt-0.001	0.003	t-test	nr	SEM	0.18	none		20	2007	17270739	TableS.3	multiple	8-12-weeks	rt-qpcr	FC-wr-vehicle	FC-wr-vehicle	β-actin, gapdh, ribosomal protein s3, and mapkapk-5	DOB	1.0	bs-vehicle	n10
González-Maeso	1	mouse	129Sv	10	male	rtqpcr	FC	1.58	doi	2	saline	60	1	acute	SSCx	cortical sensory	nfkbia	nfkbia	12	21	increase	plt-0.001	0.0038-tt	t-test	nr	SEM	0.08	Table did not define what variation was but other figures used SEM for variation.	X	5	2003	14523084	table1	multiple	8-12-weeks	rt-qpcr	normalized-fold-change	FC-wrt-RefVeh	actb,gapdh,rps3,mapkapk5	doi	2.0	bs-vehicle	nfkbia
González-Maeso	1	mouse	129Sv	10	male	rtqpcr	FC	1.22	doi	2	saline	60	1	acute	SSCx	cortical sensory	period-1	period1	12	21	increase	plt-0.0038	0.0038-tt	t-test	nr	SEM	0.04	Table did not define what variation was but other figures used SEM for variation. I could not find what period-1 gene was.	X	7	2003	14523084	table1	multiple	8-12-weeks	rt-qpcr	normalized-fold-change	FC-wrt-RefVeh	actb,gapdh,rps3,mapkapk5	doi	2.0	bs-vehicle	per1
González-Maeso	1	mouse	129Sv	10	male	rtqpcr	FC	1.28	lsd	0.24	saline	60	1	acute	SSCx	cortical sensory	period-1	period1	12	12	increase	plt-0.001	0.0038-tt	t-test	nr	SEM	0.06	Table did not define what variation was but other figures used SEM for variation. I could not find what gene period1 was.	X	16	2003	14523084	table1	multiple	8-12-weeks	rt-qpcr	normalized-fold-change	FC-wrt-RefVeh	actb,gapdh,rps3,mapkapk5	lsd	0.24	bs-vehicle	per1
González-Maeso	7	mouse	129S6/SvEv	10	male	rtqpcr	FC	1.26	doi	2	saline	60	1	acute	somatosensory-cortex	cortical sensory	period-1	period1	6–19	6–19	increase	plt-0.001	0.003	t-test	nr	SEM	0.03	none		17	2007	17270739	TableS.3	multiple	8-12-weeks	rt-qpcr	FC-wr-vehicle	FC-wr-vehicle	β-actin, gapdh, ribosomal protein s3, and mapkapk-5	doi	2.0	bs-vehicle	per1
González-Maeso	7	mouse	129S6/SvEv	10	male	rtqpcr	FC	1.49	mescaline	20	saline	60	1	acute	somatosensory-cortex	cortical sensory	period-1	period1	6–19	6–19	increase	plt-0.001	0.003	t-test	nr	SEM	0.08	none		18	2007	17270739	TableS.3	multiple	8-12-weeks	rt-qpcr	FC-wr-vehicle	FC-wr-vehicle	β-actin, gapdh, ribosomal protein s3, and mapkapk-5	Mescaline	20.0	bs-vehicle	per1
González-Maeso	7	mouse	129S6/SvEv	10	male	rtqpcr	FC	1.33	lsd	0.24	DMSO-and-saline	60	1	acute	somatosensory-cortex	cortical sensory	period-1	period1	6–19	6–19	increase	plt-0.001	0.003	t-test	nr	SEM	0.06	none		19	2007	17270739	TableS.3	multiple	8-12-weeks	rt-qpcr	FC-wr-vehicle	FC-wr-vehicle	β-actin, gapdh, ribosomal protein s3, and mapkapk-5	LSD	0.24	bs-vehicle	per1
González-Maeso	7	mouse	129S6/SvEv	10	male	rtqpcr	FC	1.28	psilocin	2	distilled-water	60	1	acute	somatosensory-cortex	cortical sensory	period-1	period1	6–19	6–19	increase	plt-0.001	0.003	t-test	nr	SEM	0.04	none		20	2007	17270739	TableS.3	multiple	8-12-weeks	rt-qpcr	FC-wr-vehicle	FC-wr-vehicle	β-actin, gapdh, ribosomal protein s3, and mapkapk-5	Psilocin	2.0	bs-vehicle	per1
González-Maeso	7	mouse	129S6/SvEv	10	male	rtqpcr	FC	1.27	dob	1	saline	60	1	acute	somatosensory-cortex	cortical sensory	period-1	period1	6–19	6–19	increase	plt-0.001	0.003	t-test	nr	SEM	0.05	none		21	2007	17270739	TableS.3	multiple	8-12-weeks	rt-qpcr	FC-wr-vehicle	FC-wr-vehicle	β-actin, gapdh, ribosomal protein s3, and mapkapk-5	DOB	1.0	bs-vehicle	per1
González-Maeso	1	mouse	129Sv	10	male	rtqpcr	FC	0.77	doi	2	saline	60	1	acute	SSCx	cortical sensory	STY-kinase	stykinase	12	21	decrease	plt-0.001	0.0038-tt	t-test	nr	SEM	0.02	Table did not define what variation was but other figures used SEM for variation. Online the gene name was CLK1.	X	9	2003	14523084	table1	multiple	8-12-weeks	rt-qpcr	normalized-fold-change	FC-wrt-RefVeh	actb,gapdh,rps3,mapkapk5	doi	2.0	bs-vehicle	STYK1
González-Maeso	7	mouse	129S6/SvEv	10	male	rtqpcr	FC	0.78	doi	2	saline	60	1	acute	somatosensory-cortex	cortical sensory	sty-kinase	stykinase	6–19	6–19	increase	plt-0.001	0.003	t-test	nr	SEM	0.02	none		10	2007	17270739	TableS.3	multiple	8-12-weeks	rt-qpcr	FC-wr-vehicle	FC-wr-vehicle	β-actin, gapdh, ribosomal protein s3, and mapkapk-5	doi	2.0	bs-vehicle	STYK1
González-Maeso	7	mouse	129S6/SvEv	10	male	rtqpcr	FC	0.77	psilocin	2	distilled-water	60	1	acute	somatosensory-cortex	cortical sensory	sty-kinase	stykinase	6–19	6–19	increase	plt-0.001	0.003	t-test	nr	SEM	0.04	none		11	2007	17270739	TableS.3	multiple	8-12-weeks	rt-qpcr	FC-wr-vehicle	FC-wr-vehicle	β-actin, gapdh, ribosomal protein s3, and mapkapk-5	Psilocin	2.0	bs-vehicle	STYK1
González-Maeso	7	mouse	129S6/SvEv	10	male	rtqpcr	FC	0.77	dom	4	saline	60	1	acute	somatosensory-cortex	cortical sensory	sty-kinase	stykinase	6–19	6–19	increase	plt-0.001	0.003	t-test	nr	SEM	0.02	none		12	2007	17270739	TableS.3	multiple	8-12-weeks	rt-qpcr	FC-wr-vehicle	FC-wr-vehicle	β-actin, gapdh, ribosomal protein s3, and mapkapk-5	DOM	4.0	bs-vehicle	STYK1
González-Maeso	7	mouse	129S6/SvEv	10	male	rtqpcr	FC	0.78	dob	1	saline	60	1	acute	somatosensory-cortex	cortical sensory	sty-kinase	stykinase	6–19	6–19	increase	plt-0.001	0.003	t-test	nr	SEM	0.03	none		13	2007	17270739	TableS.3	multiple	8-12-weeks	rt-qpcr	FC-wr-vehicle	FC-wr-vehicle	β-actin, gapdh, ribosomal protein s3, and mapkapk-5	DOB	1.0	bs-vehicle	STYK1
Lerer	1	mouse	C57BL6J	12	male	rtqpcr	FC	2.534	psil	4.4	saline	60	1	acute	somatosensory-cortex	cortical sensory	cfos	cfos	6	8	increase	0.0048	0.05-tt	t-test	nr	SEM	0.346	none		1	2024	38698823	suppMat	gapdh	adult	rt-qpcr	normalized-fold-change	FC-wrt-RefGene	gapdh	psil	4.4	bs-vehicle	fos
Lerer	2	mouse	C57BL6J	12	male	rtqpcr	FC	1.367	psil	4.4	saline	60	1	acute	somatosensory-cortex	cortical sensory	cfos	cfos	9	10	increase	0.001	0.05-tt	f-test	8.978	SEM	0.078	combined PSIL+PME		4	2024	38698823	suppMat	gapdh	adult	rt-qpcr	normalized-fold-change	FC-wrt-RefGene	gapdh	psil	4.4	bs-vehicle	fos
Lerer	2	mouse	C57BL6J	12	male	rtqpcr	FC	1.391	pme-psilEquiv	4.4	saline	60	1	acute	somatosensory-cortex	cortical sensory	cfos	cfos	9	10	increase	0.001	0.05-tt	f-test	8.978	SEM	0.102	combined PSIL+PME		6	2024	38698823	suppMat	gapdh	adult	rt-qpcr	normalized-fold-change	FC-wrt-RefGene	gapdh	pme-equivPSIL	4.4	bs-vehicle	fos
Lerer	1	mouse	C57BL6J	12	male	rtqpcr	FC	1.677	psil	4.4	saline	60	1	acute	somatosensory-cortex	cortical sensory	egr1	egr1	6	8	increase	0.042	0.05-tt	t-test	nr	SEM	0.22	none		2	2024	38698823	suppMat	gapdh	adult	rt-qpcr	normalized-fold-change	FC-wrt-RefGene	gapdh	psil	4.4	bs-vehicle	egr1
Lerer	2	mouse	C57BL6J	12	male	rtqpcr	FC	1.152	psil	4.4	saline	60	1	acute	somatosensory-cortex	cortical sensory	egr1	egr1	9	10	increase	0.0069	0.05-tt	f-test	6.109	SEM	0.053	combined PSIL+PME		5	2024	38698823	suppMat	gapdh	adult	rt-qpcr	normalized-fold-change	FC-wrt-RefGene	gapdh	psil	4.4	bs-vehicle	egr1
Lerer	2	mouse	C57BL6J	12	male	rtqpcr	FC	1.133	pme-psilEquiv	4.4	saline	60	1	acute	somatosensory-cortex	cortical sensory	egr1	egr1	9	10	increase	0.0069	0.05-tt	f-test	6.109	SEM	0.037	combined PSIL+PME		7	2024	38698823	suppMat	gapdh	adult	rt-qpcr	normalized-fold-change	FC-wrt-RefGene	gapdh	pme-equivPSIL	4.4	bs-vehicle	egr1
Lerer	1	mouse	C57BL6J	12	male	rtqpcr	FC	2.687	psil	4.4	saline	60	1	acute	somatosensory-cortex	cortical sensory	egr2	egr2	6	8	increase	0.0041	0.05-tt	t-test	nr	SEM	0.362	none		3	2024	38698823	suppMat	gapdh	adult	rt-qpcr	normalized-fold-change	FC-wrt-RefGene	gapdh	psil	4.4	bs-vehicle	egr2
Santini	1	mouse	C57BL6J	nr	both	rtqpcr	%control	230	doi	2	saline	60	1	acute	S1 cortex	cortical sensory	cFos	cfos	9	9	increase	0.0001	plt-0.0001	two-way ANOVA	19.81	SEM	25	Effect size value (%change from control) estimated from graph; Post-hoc test was not explicitly stated, but found significant differences btwn WT + DOI vs Saline as well as differnces btwn SRKO mice + DOI vs SRKO + saline	x	1	2014	24269270	figure-1	gapdh	nr	RTqPCR	expression-%-of-control	expression-%-of-control	gapdh	DOI	2 mg/kg	BS-vehicle	fos
Vaidya	3	rat	spraguedawley	nr	male	ish	%control	125	doi	2	saline	60	1	acute	parietal-cortex	cortical parietal	bdnf	bdnf	4	4	increase	plt0.05	0.05	q-test	nr	SEM	nr	EffectSizeValue estimated from figure		7	1997	9092600	main	multiple	nr	in-situ-hybridization	%-of-vehicle	mean	none	doi	2.0	bs-vehicle	bdnf
Jefsen	1	rat	spraguedawley	8	male	rtqpcr	%control	85	psil	20	saline	90	1.5	acute	hippocampus	subcortical	arc	arc	10	10	decrease	0.0328	0.05	f-test	2.773	SEM	nr	8 reference genes, but gene combination ref/tar were not reported. Mean eyeballed from figure.		31	2021	33143539	suppmat	nr	adult	rt-qpcr	percent-of-vehicle	mean-%-vehicle	nr	psil	20.0	bs-vehicle	arc
Jefsen	1	rat	spraguedawley	8	male	rtqpcr	%control	140	psil	8	saline	90	1.5	acute	hippocampus	subcortical	arrdc2	arrdc2	10	10	increase	0.0031	0.05	h-test	29.29	SEM	nr	8 reference genes, but gene combination ref/tar were not reported. Mean eyeballed from figure.		32	2021	33143539	suppmat	nr	adult	rt-qpcr	percent-of-vehicle	mean-%-vehicle	nr	psil	8.0	bs-vehicle	arrdc2
Jefsen	1	rat	spraguedawley	8	male	rtqpcr	%control	160	psil	14	saline	90	1.5	acute	hippocampus	subcortical	arrdc2	arrdc2	10	10	increase	0.0004	0.05	h-test	29.29	SEM	nr	8 reference genes, but gene combination ref/tar were not reported. Mean eyeballed from figure.		33	2021	33143539	suppmat	nr	adult	rt-qpcr	percent-of-vehicle	mean-%-vehicle	nr	psil	14.0	bs-vehicle	arrdc2
Jefsen	1	rat	spraguedawley	8	male	rtqpcr	%control	162	psil	20	saline	90	1.5	acute	hippocampus	subcortical	arrdc2	arrdc2	10	10	increase	0.0043	0.05	h-test	29.29	SEM	nr	8 reference genes, but gene combination ref/tar were not reported. Mean eyeballed from figure.		34	2021	33143539	suppmat	nr	adult	rt-qpcr	percent-of-vehicle	mean-%-vehicle	nr	psil	20.0	bs-vehicle	arrdc2
Jefsen	1	rat	spraguedawley	8	male	rtqpcr	%control	140	psil	4	saline	90	1.5	acute	prefrontal-cortex	cortical prefrontal	cebpb	cebpb	10	10	increase	0.0397	0.05	f-test	6.532	SEM	nr	8 reference genes, but gene combination ref/tar were not reported. Mean eyeballed from figure.		1	2021	33143539	suppmat	nr	adult	rt-qpcr	percent-of-vehicle	mean-%-vehicle	nr	psil	4.0	bs-vehicle	cebpb
Jefsen	1	rat	spraguedawley	8	male	rtqpcr	%control	173	psil	8	saline	90	1.5	acute	prefrontal-cortex	cortical prefrontal	cebpb	cebpb	10	10	increase	0.0008	0.05	f-test	6.532	SEM	nr	8 reference genes, but gene combination ref/tar were not reported. Mean eyeballed from figure.		2	2021	33143539	suppmat	nr	adult	rt-qpcr	percent-of-vehicle	mean-%-vehicle	nr	psil	8.0	bs-vehicle	cebpb
Jefsen	1	rat	spraguedawley	8	male	rtqpcr	%control	175	psil	14	saline	90	1.5	acute	prefrontal-cortex	cortical prefrontal	cebpb	cebpb	10	9	increase	0.0008	0.05	f-test	6.532	SEM	nr	8 reference genes, but gene combination ref/tar were not reported. Mean eyeballed from figure.		3	2021	33143539	suppmat	nr	adult	rt-qpcr	percent-of-vehicle	mean-%-vehicle	nr	psil	14.0	bs-vehicle	cebpb
Jefsen	1	rat	spraguedawley	8	male	rtqpcr	%control	185	psil	20	saline	90	1.5	acute	prefrontal-cortex	cortical prefrontal	cebpb	cebpb	10	10	increase	<0.0001	0.05	f-test	6.532	SEM	nr	8 reference genes, but gene combination ref/tar were not reported. Mean eyeballed from figure.		4	2021	33143539	suppmat	nr	adult	rt-qpcr	percent-of-vehicle	mean-%-vehicle	nr	psil	20.0	bs-vehicle	cebpb
Jefsen	1	rat	spraguedawley	8	male	rtqpcr	%control	187	psil	8	saline	90	1.5	acute	prefrontal-cortex	cortical prefrontal	cfos	cfos	10	10	increase	0.0012	0.05	f-test	4.829	SEM	nr	8 reference genes, but gene combination ref/tar were not reported. Mean eyeballed from figure.		5	2021	33143539	suppmat	nr	adult	rt-qpcr	percent-of-vehicle	mean-%-vehicle	nr	psil	8.0	bs-vehicle	fos
Jefsen	1	rat	spraguedawley	8	male	rtqpcr	%control	150	psil	20	saline	90	1.5	acute	prefrontal-cortex	cortical prefrontal	cfos	cfos	10	10	increase	<0.0001	0.05	f-test	4.829	SEM	nr	8 reference genes, but gene combination ref/tar were not reported. Mean eyeballed from figure.		6	2021	33143539	suppmat	nr	adult	rt-qpcr	percent-of-vehicle	mean-%-vehicle	nr	psil	20.0	bs-vehicle	fos
Jefsen	1	rat	spraguedawley	8	male	rtqpcr	%control	150	psil	20	saline	90	1.5	acute	prefrontal-cortex	cortical prefrontal	fosb	cfosb	10	10	increase	0.0044	0.05	h-test	16.21	SEM	nr	8 reference genes, but gene combination ref/tar were not reported. Mean eyeballed from figure.		14	2021	33143539	suppmat	nr	adult	rt-qpcr	percent-of-vehicle	mean-%-vehicle	nr	psil	20.0	bs-vehicle	fos
Jefsen	1	rat	spraguedawley	8	male	rtqpcr	%control	75	psil	4	saline	90	1.5	acute	prefrontal-cortex	cortical prefrontal	clk1	clk1	10	10	decrease	0.0324	0.05	f-test	4.284	SEM	nr	8 reference genes, but gene combination ref/tar were not reported. Mean eyeballed from figure.		7	2021	33143539	suppmat	nr	adult	rt-qpcr	percent-of-vehicle	mean-%-vehicle	nr	psil	4.0	bs-vehicle	clk1
Jefsen	1	rat	spraguedawley	8	male	rtqpcr	%control	70	psil	8	saline	90	1.5	acute	prefrontal-cortex	cortical prefrontal	clk1	clk1	10	10	decrease	0.0156	0.05	f-test	4.284	SEM	nr	8 reference genes, but gene combination ref/tar were not reported. Mean eyeballed from figure.		8	2021	33143539	suppmat	nr	adult	rt-qpcr	percent-of-vehicle	mean-%-vehicle	nr	psil	8.0	bs-vehicle	clk1
Jefsen	1	rat	spraguedawley	8	male	rtqpcr	%control	65	psil	14	saline	90	1.5	acute	prefrontal-cortex	cortical prefrontal	clk1	clk1	10	10	decrease	0.0023	0.05	f-test	4.284	SEM	nr	8 reference genes, but gene combination ref/tar were not reported. Mean eyeballed from figure.		9	2021	33143539	suppmat	nr	adult	rt-qpcr	percent-of-vehicle	mean-%-vehicle	nr	psil	14.0	bs-vehicle	clk1
Jefsen	1	rat	spraguedawley	8	male	rtqpcr	%control	70	psil	2	saline	90	1.5	acute	hippocampus	subcortical	clk1	clk1	10	10	decrease	0.0053	0.05	f-test	6.163	SEM	nr	8 reference genes, but gene combination ref/tar were not reported. Mean eyeballed from figure.		35	2021	33143539	suppmat	nr	adult	rt-qpcr	percent-of-vehicle	mean-%-vehicle	nr	psil	2.0	bs-vehicle	clk1
Jefsen	1	rat	spraguedawley	8	male	rtqpcr	%control	75	psil	4	saline	90	1.5	acute	hippocampus	subcortical	clk1	clk1	10	10	decrease	0.0149	0.05	f-test	6.163	SEM	nr	8 reference genes, but gene combination ref/tar were not reported. Mean eyeballed from figure.		36	2021	33143539	suppmat	nr	adult	rt-qpcr	percent-of-vehicle	mean-%-vehicle	nr	psil	4.0	bs-vehicle	clk1
Jefsen	1	rat	spraguedawley	8	male	rtqpcr	%control	65	psil	8	saline	90	1.5	acute	hippocampus	subcortical	clk1	clk1	10	10	decrease	0.0008	0.05	f-test	6.163	SEM	nr	8 reference genes, but gene combination ref/tar were not reported. Mean eyeballed from figure.		37	2021	33143539	suppmat	nr	adult	rt-qpcr	percent-of-vehicle	mean-%-vehicle	nr	psil	8.0	bs-vehicle	clk1
Jefsen	1	rat	spraguedawley	8	male	rtqpcr	%control	62	psil	14	saline	90	1.5	acute	hippocampus	subcortical	clk1	clk1	10	10	decrease	0.0006	0.05	f-test	6.163	SEM	nr	8 reference genes, but gene combination ref/tar were not reported. Mean eyeballed from figure.		38	2021	33143539	suppmat	nr	adult	rt-qpcr	percent-of-vehicle	mean-%-vehicle	nr	psil	14.0	bs-vehicle	clk1
Jefsen	1	rat	spraguedawley	8	male	rtqpcr	%control	68	psil	20	saline	90	1.5	acute	hippocampus	subcortical	clk1	clk1	10	10	decrease	0.0033	0.05	f-test	6.163	SEM	nr	8 reference genes, but gene combination ref/tar were not reported. Mean eyeballed from figure.		39	2021	33143539	suppmat	nr	adult	rt-qpcr	percent-of-vehicle	mean-%-vehicle	nr	psil	20.0	bs-vehicle	clk1
Jefsen	1	rat	spraguedawley	8	male	rtqpcr	%control	155	psil	8	saline	90	1.5	acute	prefrontal-cortex	cortical prefrontal	dusp1	dusp1	10	9	increase	0.0069	0.05	f-test	31.07	SEM	nr	8 reference genes, but gene combination ref/tar were not reported. Mean eyeballed from figure.		11	2021	33143539	suppmat	nr	adult	rt-qpcr	percent-of-vehicle	mean-%-vehicle	nr	psil	8.0	bs-vehicle	dusp1
Jefsen	1	rat	spraguedawley	8	male	rtqpcr	%control	150	psil	14	saline	90	1.5	acute	prefrontal-cortex	cortical prefrontal	dusp1	dusp1	10	10	increase	0.0262	0.05	f-test	31.07	SEM	nr	8 reference genes, but gene combination ref/tar were not reported. Mean eyeballed from figure.		12	2021	33143539	suppmat	nr	adult	rt-qpcr	percent-of-vehicle	mean-%-vehicle	nr	psil	14.0	bs-vehicle	dusp1
Jefsen	1	rat	spraguedawley	8	male	rtqpcr	%control	170	psil	20	saline	90	1.5	acute	prefrontal-cortex	cortical prefrontal	dusp1	dusp1	10	10	increase	<0.0001	0.05	f-test	31.07	SEM	nr	8 reference genes, but gene combination ref/tar were not reported. Mean eyeballed from figure.		13	2021	33143539	suppmat	nr	adult	rt-qpcr	percent-of-vehicle	mean-%-vehicle	nr	psil	20.0	bs-vehicle	dusp1
Jefsen	1	rat	spraguedawley	8	male	rtqpcr	%control	150	psil	4	saline	90	1.5	acute	hippocampus	subcortical	dusp1	dusp1	10	10	increase	0.0206	0.05	h-test	55.28	SEM	nr	8 reference genes, but gene combination ref/tar were not reported. Mean eyeballed from figure.		40	2021	33143539	suppmat	nr	adult	rt-qpcr	percent-of-vehicle	mean-%-vehicle	nr	psil	4.0	bs-vehicle	dusp1
Jefsen	1	rat	spraguedawley	8	male	rtqpcr	%control	190	psil	8	saline	90	1.5	acute	hippocampus	subcortical	dusp1	dusp1	10	10	increase	0.0005	0.05	h-test	55.28	SEM	nr	8 reference genes, but gene combination ref/tar were not reported. Mean eyeballed from figure.		41	2021	33143539	suppmat	nr	adult	rt-qpcr	percent-of-vehicle	mean-%-vehicle	nr	psil	8.0	bs-vehicle	dusp1
Jefsen	1	rat	spraguedawley	8	male	rtqpcr	%control	210	psil	14	saline	90	1.5	acute	hippocampus	subcortical	dusp1	dusp1	10	10	increase	<0.0001	0.05	h-test	55.28	SEM	nr	8 reference genes, but gene combination ref/tar were not reported. Mean eyeballed from figure.		42	2021	33143539	suppmat	nr	adult	rt-qpcr	percent-of-vehicle	mean-%-vehicle	nr	psil	14.0	bs-vehicle	dusp1
Jefsen	1	rat	spraguedawley	8	male	rtqpcr	%control	208	psil	20	saline	90	1.5	acute	hippocampus	subcortical	dusp1	dusp1	10	10	increase	<0.0001	0.05	h-test	55.28	SEM	nr	8 reference genes, but gene combination ref/tar were not reported. Mean eyeballed from figure.		43	2021	33143539	suppmat	nr	adult	rt-qpcr	percent-of-vehicle	mean-%-vehicle	nr	psil	20.0	bs-vehicle	dusp1
Jefsen	1	rat	spraguedawley	8	male	rtqpcr	%control	75	psil	8	saline	90	1.5	acute	hippocampus	subcortical	egr2	egr2	10	10	decrease	0.0164	0.05	f-test	2.353	SEM	nr	8 reference genes, but gene combination ref/tar were not reported. Mean eyeballed from figure.		44	2021	33143539	suppmat	nr	adult	rt-qpcr	percent-of-vehicle	mean-%-vehicle	nr	psil	8.0	bs-vehicle	egr2
Jefsen	1	rat	spraguedawley	8	male	rtqpcr	%control	77	psil	14	saline	90	1.5	acute	hippocampus	subcortical	egr2	egr2	10	10	decrease	0.0499	0.05	f-test	2.353	SEM	nr	8 reference genes, but gene combination ref/tar were not reported. Mean eyeballed from figure.		45	2021	33143539	suppmat	nr	adult	rt-qpcr	percent-of-vehicle	mean-%-vehicle	nr	psil	14.0	bs-vehicle	egr2
Jefsen	1	rat	spraguedawley	8	male	rtqpcr	%control	210	psil	4	saline	90	1.5	acute	prefrontal-cortex	cortical prefrontal	IkB-a	ikba	10	10	increase	0.0018	0.05	h-test	36.66	SEM	nr	8 reference genes, but gene combination ref/tar were not reported. Mean eyeballed from figure.		15	2021	33143539	suppmat	nr	adult	rt-qpcr	percent-of-vehicle	mean-%-vehicle	nr	psil	4.0	bs-vehicle	nfkbia
Jefsen	1	rat	spraguedawley	8	male	rtqpcr	%control	190	psil	8	saline	90	1.5	acute	prefrontal-cortex	cortical prefrontal	IkB-a	ikba	10	10	increase	0.0079	0.05	h-test	36.66	SEM	nr	8 reference genes, but gene combination ref/tar were not reported. Mean eyeballed from figure.		16	2021	33143539	suppmat	nr	adult	rt-qpcr	percent-of-vehicle	mean-%-vehicle	nr	psil	8.0	bs-vehicle	nfkbia
Jefsen	1	rat	spraguedawley	8	male	rtqpcr	%control	195	psil	14	saline	90	1.5	acute	prefrontal-cortex	cortical prefrontal	IkB-a	ikba	10	10	increase	0.0035	0.05	h-test	36.66	SEM	nr	8 reference genes, but gene combination ref/tar were not reported. Mean eyeballed from figure.		17	2021	33143539	suppmat	nr	adult	rt-qpcr	percent-of-vehicle	mean-%-vehicle	nr	psil	14.0	bs-vehicle	nfkbia
Jefsen	1	rat	spraguedawley	8	male	rtqpcr	%control	215	psil	20	saline	90	1.5	acute	prefrontal-cortex	cortical prefrontal	IkB-a	ikba	10	10	increase	0.0003	0.05	h-test	36.66	SEM	nr	8 reference genes, but gene combination ref/tar were not reported. Mean eyeballed from figure.		18	2021	33143539	suppmat	nr	adult	rt-qpcr	percent-of-vehicle	mean-%-vehicle	nr	psil	20.0	bs-vehicle	nfkbia
Jefsen	1	rat	spraguedawley	8	male	rtqpcr	%control	190	psil	4	saline	90	1.5	acute	hippocampus	subcortical	IkB-a	ikba	10	10	increase	0.0017	0.05	h-test	58.44	SEM	nr	8 reference genes, but gene combination ref/tar were not reported. Mean eyeballed from figure.		47	2021	33143539	suppmat	nr	adult	rt-qpcr	percent-of-vehicle	mean-%-vehicle	nr	psil	4.0	bs-vehicle	nfkbia
Jefsen	1	rat	spraguedawley	8	male	rtqpcr	%control	185	psil	8	saline	90	1.5	acute	hippocampus	subcortical	IkB-a	ikba	10	9	increase	0.0051	0.05	h-test	58.44	SEM	nr	8 reference genes, but gene combination ref/tar were not reported. Mean eyeballed from figure.		48	2021	33143539	suppmat	nr	adult	rt-qpcr	percent-of-vehicle	mean-%-vehicle	nr	psil	8.0	bs-vehicle	nfkbia
Jefsen	1	rat	spraguedawley	8	male	rtqpcr	%control	210	psil	14	saline	90	1.5	acute	hippocampus	subcortical	IkB-a	ikba	10	10	increase	<0.0001	0.05	h-test	58.44	SEM	nr	8 reference genes, but gene combination ref/tar were not reported. Mean eyeballed from figure.		49	2021	33143539	suppmat	nr	adult	rt-qpcr	percent-of-vehicle	mean-%-vehicle	nr	psil	14.0	bs-vehicle	nfkbia
Jefsen	1	rat	spraguedawley	8	male	rtqpcr	%control	200	psil	20	saline	90	1.5	acute	hippocampus	subcortical	IkB-a	ikba	10	10	increase	<0.0001	0.05	h-test	58.44	SEM	nr	8 reference genes, but gene combination ref/tar were not reported. Mean eyeballed from figure.		50	2021	33143539	suppmat	nr	adult	rt-qpcr	percent-of-vehicle	mean-%-vehicle	nr	psil	20.0	bs-vehicle	nfkbia
Jefsen	1	rat	spraguedawley	8	male	rtqpcr	%control	110	psil	14	saline	90	1.5	acute	hippocampus	subcortical	il6	il6	9	10	increase	0.0391	0.05	h-test	15.8	SEM	nr	8 reference genes, but gene combination ref/tar were not reported. Mean eyeballed from figure.		51	2021	33143539	suppmat	nr	adult	rt-qpcr	percent-of-vehicle	mean-%-vehicle	nr	psil	14.0	bs-vehicle	il6
Jefsen	1	rat	spraguedawley	8	male	rtqpcr	%control	150	psil	8	saline	90	1.5	acute	prefrontal-cortex	cortical prefrontal	junb	junb	10	10	increase	0.0059	0.05	f-test	4.731	SEM	nr	8 reference genes, but gene combination ref/tar were not reported. Mean eyeballed from figure.		19	2021	33143539	suppmat	nr	adult	rt-qpcr	percent-of-vehicle	mean-%-vehicle	nr	psil	8.0	bs-vehicle	junb
Jefsen	1	rat	spraguedawley	8	male	rtqpcr	%control	145	psil	14	saline	90	1.5	acute	prefrontal-cortex	cortical prefrontal	junb	junb	10	10	increase	0.0319	0.05	f-test	4.731	SEM	nr	8 reference genes, but gene combination ref/tar were not reported. Mean eyeballed from figure.		20	2021	33143539	suppmat	nr	adult	rt-qpcr	percent-of-vehicle	mean-%-vehicle	nr	psil	14.0	bs-vehicle	junb
Jefsen	1	rat	spraguedawley	8	male	rtqpcr	%control	185	psil	20	saline	90	1.5	acute	prefrontal-cortex	cortical prefrontal	junb	junb	10	10	increase	<0.0001	0.05	f-test	4.731	SEM	nr	8 reference genes, but gene combination ref/tar were not reported. Mean eyeballed from figure.		21	2021	33143539	suppmat	nr	adult	rt-qpcr	percent-of-vehicle	mean-%-vehicle	nr	psil	20.0	bs-vehicle	junb
Jefsen	1	rat	spraguedawley	8	male	rtqpcr	%control	150	psil	8	saline	90	1.5	acute	prefrontal-cortex	cortical prefrontal	nr4a1	nr4a1	10	10	increase	0.0063	0.05	f-test	2.949	SEM	nr	8 reference genes, but gene combination ref/tar were not reported. Mean eyeballed from figure.		22	2021	33143539	suppmat	nr	adult	rt-qpcr	percent-of-vehicle	mean-%-vehicle	nr	psil	8.0	bs-vehicle	nr4a1
Jefsen	1	rat	spraguedawley	8	male	rtqpcr	%control	160	psil	20	saline	90	1.5	acute	prefrontal-cortex	cortical prefrontal	nr4a1	nr4a1	10	10	increase	0.0034	0.05	f-test	2.949	SEM	nr	8 reference genes, but gene combination ref/tar were not reported. Mean eyeballed from figure.		23	2021	33143539	suppmat	nr	adult	rt-qpcr	percent-of-vehicle	mean-%-vehicle	nr	psil	20.0	bs-vehicle	nr4a1
Jefsen	1	rat	spraguedawley	8	male	rtqpcr	%control	150	psil	2	saline	90	1.5	acute	prefrontal-cortex	cortical prefrontal	p11	p11	10	9	increase	0.0463	0.05	f-test	2.182	SEM	nr	8 reference genes, but gene combination ref/tar were not reported. Mean eyeballed from figure.		24	2021	33143539	suppmat	nr	adult	rt-qpcr	percent-of-vehicle	mean-%-vehicle	nr	psil	2.0	bs-vehicle	S100A10
Jefsen	1	rat	spraguedawley	8	male	rtqpcr	%control	145	psil	8	saline	90	1.5	acute	prefrontal-cortex	cortical prefrontal	p11	p11	10	10	increase	0.0078	0.05	f-test	2.182	SEM	nr	8 reference genes, but gene combination ref/tar were not reported. Mean eyeballed from figure.		25	2021	33143539	suppmat	nr	adult	rt-qpcr	percent-of-vehicle	mean-%-vehicle	nr	psil	8.0	bs-vehicle	S100A10
Jefsen	1	rat	spraguedawley	8	male	rtqpcr	%control	105	psil	8	saline	90	1.5	acute	prefrontal-cortex	cortical prefrontal	psd95	psd95	10	8	increase	0.0201	0.05	h-test	14.23	SEM	nr	8 reference genes, but gene combination ref/tar were not reported. Mean eyeballed from figure.		26	2021	33143539	suppmat	nr	adult	rt-qpcr	percent-of-vehicle	mean-%-vehicle	nr	psil	8.0	bs-vehicle	DLG4
Jefsen	1	rat	spraguedawley	8	male	rtqpcr	%control	85	psil	8	saline	90	1.5	acute	hippocampus	subcortical	ptgs2	ptgs2	10	10	decrease	0.0141	0.05	h-test	25.44	SEM	nr	8 reference genes, but gene combination ref/tar were not reported. Mean eyeballed from figure.		52	2021	33143539	suppmat	nr	adult	rt-qpcr	percent-of-vehicle	mean-%-vehicle	nr	psil	8.0	bs-vehicle	ptgs2
Jefsen	1	rat	spraguedawley	8	male	rtqpcr	%control	85	psil	14	saline	90	1.5	acute	hippocampus	subcortical	ptgs2	ptgs2	10	10	decrease	0.0072	0.05	h-test	25.44	SEM	nr	8 reference genes, but gene combination ref/tar were not reported. Mean eyeballed from figure.		53	2021	33143539	suppmat	nr	adult	rt-qpcr	percent-of-vehicle	mean-%-vehicle	nr	psil	14.0	bs-vehicle	ptgs2
Jefsen	1	rat	spraguedawley	8	male	rtqpcr	%control	86	psil	20	saline	90	1.5	acute	hippocampus	subcortical	ptgs2	ptgs2	10	10	decrease	0.0379	0.05	h-test	25.44	SEM	nr	8 reference genes, but gene combination ref/tar were not reported. Mean eyeballed from figure.		54	2021	33143539	suppmat	nr	adult	rt-qpcr	percent-of-vehicle	mean-%-vehicle	nr	psil	20.0	bs-vehicle	ptgs2
Jefsen	1	rat	spraguedawley	8	male	rtqpcr	%control	200	psil	4	saline	90	1.5	acute	prefrontal-cortex	cortical prefrontal	sgk1	sgk1	9	10	increase	0.0225	0.05	h-test	37.32	SEM	nr	8 reference genes, but gene combination ref/tar were not reported. Mean eyeballed from figure.		27	2021	33143539	suppmat	nr	adult	rt-qpcr	percent-of-vehicle	mean-%-vehicle	nr	psil	4.0	bs-vehicle	sgk1
Jefsen	1	rat	spraguedawley	8	male	rtqpcr	%control	250	psil	8	saline	90	1.5	acute	prefrontal-cortex	cortical prefrontal	sgk1	sgk1	9	8	increase	0.0143	0.05	h-test	37.32	SEM	nr	8 reference genes, but gene combination ref/tar were not reported. Mean eyeballed from figure.		28	2021	33143539	suppmat	nr	adult	rt-qpcr	percent-of-vehicle	mean-%-vehicle	nr	psil	8.0	bs-vehicle	sgk1
Jefsen	1	rat	spraguedawley	8	male	rtqpcr	%control	205	psil	14	saline	90	1.5	acute	prefrontal-cortex	cortical prefrontal	sgk1	sgk1	9	10	increase	0.0475	0.05	h-test	37.32	SEM	nr	8 reference genes, but gene combination ref/tar were not reported. Mean eyeballed from figure.		29	2021	33143539	suppmat	nr	adult	rt-qpcr	percent-of-vehicle	mean-%-vehicle	nr	psil	14.0	bs-vehicle	sgk1
Jefsen	1	rat	spraguedawley	8	male	rtqpcr	%control	225	psil	20	saline	90	1.5	acute	prefrontal-cortex	cortical prefrontal	sgk1	sgk1	9	9	increase	0.0062	0.05	h-test	37.32	SEM	nr	8 reference genes, but gene combination ref/tar were not reported. Mean eyeballed from figure.		30	2021	33143539	suppmat	nr	adult	rt-qpcr	percent-of-vehicle	mean-%-vehicle	nr	psil	20.0	bs-vehicle	sgk1
Jefsen	1	rat	spraguedawley	8	male	rtqpcr	%control	150	psil	4	saline	90	1.5	acute	hippocampus	subcortical	sgk1	sgk1	10	10	increase	0.0358	0.05	h-test	37.32	SEM	nr	8 reference genes, but gene combination ref/tar were not reported. Mean eyeballed from figure.		55	2021	33143539	suppmat	nr	adult	rt-qpcr	percent-of-vehicle	mean-%-vehicle	nr	psil	4.0	bs-vehicle	sgk1
Jefsen	1	rat	spraguedawley	8	male	rtqpcr	%control	152	psil	8	saline	90	1.5	acute	hippocampus	subcortical	sgk1	sgk1	10	10	increase	0.0165	0.05	h-test	37.32	SEM	nr	8 reference genes, but gene combination ref/tar were not reported. Mean eyeballed from figure.		56	2021	33143539	suppmat	nr	adult	rt-qpcr	percent-of-vehicle	mean-%-vehicle	nr	psil	8.0	bs-vehicle	sgk1
Jefsen	1	rat	spraguedawley	8	male	rtqpcr	%control	180	psil	14	saline	90	1.5	acute	hippocampus	subcortical	sgk1	sgk1	10	10	increase	0.0014	0.05	h-test	37.32	SEM	nr	8 reference genes, but gene combination ref/tar were not reported. Mean eyeballed from figure.		57	2021	33143539	suppmat	nr	adult	rt-qpcr	percent-of-vehicle	mean-%-vehicle	nr	psil	14.0	bs-vehicle	sgk1
Jefsen	1	rat	spraguedawley	8	male	rtqpcr	%control	152	psil	20	saline	90	1.5	acute	hippocampus	subcortical	sgk1	sgk1	10	10	increase	0.0089	0.05	h-test	37.32	SEM	nr	8 reference genes, but gene combination ref/tar were not reported. Mean eyeballed from figure.		58	2021	33143539	suppmat	nr	adult	rt-qpcr	percent-of-vehicle	mean-%-vehicle	nr	psil	20.0	bs-vehicle	sgk1
Nichols	2	rat	spraguedawley	nr	male	rnasepro	%control	148	lsd	1	saline	90	1.5	acute	pfc	cortical prefrontal	ania3	ania3	4	4	increase	plt0.05	0.05	t-test	nr	nr	nr	estimate from figure		14	2002	11927188	main	cypA	nr	rnase-protection	expression-%-of-control	%-of-control	cypA	lsd	1.0	bs-vehicle	HOMER1
Nichols	2	rat	spraguedawley	nr	male	rnasepro	%control	135	lsd	1	saline	90	1.5	acute	midbrain	subcortical	ania3	ania3	4	4	increase	plt0.05	0.05	t-test	nr	nr	nr	estimate from figure		15	2002	11927188	main	cypA	nr	rnase-protection	expression-%-of-control	%-of-control	cypA	lsd	1.0	bs-vehicle	HOMER1
Nichols	2	rat	sprague-dawley	nr	male	rnasepro	%control	180	lsd	1.0	saline	90	1.5	acute	prefrontal-cortex	cortical prefrontal	ania3	ania3	4	4	increase	plt0.05	0.05	t-test	nr	SEM	nr	tx=4 per tx group. effectsize eyeballed		2	2003	12654518	main	cyclophilin	nr	rnase-protection-assay	percent-expressed-compared-to-baseline		cyclophilin	lsd	1.0	bs-vehicle	HOMER1
Nichols	4	rat	sprague-dawley	nr	male	rnasepro	%control	125	lsd	0.5	saline	90	1.5	acute	prefrontal-cortex	cortical prefrontal	ania3	ania3	4	4	increase	plt0.05	0.05	t-test	nr	SEM	nr	tx=4 per tx group. effectsize eyeballed		9	2003	12654518	main	cyclophilin	nr	rnase-protection-assay	percent-expressed-compared-to-baseline		cyclophilin	lsd	0.5	bs-vehicle	HOMER1
Nichols	5	rat	sprague-dawley	nr	male	rnasepro	%control	180	lsd	1.0	saline	90	1.5	acute	prefrontal-cortex	cortical prefrontal	ania3	ania3	4	3	increase	plt0.05	0.05	t-test	nr	SEM	nr	tx=3 independent samples pooled from groups of 4 rats. effectsize eyeballed		13	2003	12654518	main	cyclophilin	nr	rnase-protection-assay	percent-expressed-compared-to-baseline		cyclophilin	lsd	1.0	bs-vehicle	HOMER1
Nichols	6	rat	sprague-dawley	nr	male	rnasepro	%control	125	lsd	0.5	saline	90	1.5	acute	prefrontal-cortex	cortical prefrontal	ania3	ania3	4	4	increase	plt0.05	0.05	t-test	nr	SEM	nr	tx=4 independent rats. effectsize eyeballed		26	2003	12654518	main	cyclophilin	nr	rnase-protection-assay	percent-expressed-compared-to-baseline		cyclophilin	lsd	0.5	bs-vehicle	HOMER1
Nichols	6	rat	sprague-dawley	nr	male	rnasepro	%control	175	lsd	1.0	saline	90	1.5	acute	prefrontal-cortex	cortical prefrontal	ania3	ania3	4	3	increase	plt0.05	0.05	t-test	nr	SEM	nr	tx=3 independent samples pooled from groups of 4 rats. effectsize eyeballed		27	2003	12654518	main	cyclophilin	nr	rnase-protection-assay	percent-expressed-compared-to-baseline		cyclophilin	lsd	1.0	bs-vehicle	HOMER1
Nichols	3	rat	sprague-dawley	nr	male	rnasepro	%control	175	lsd	1.0	saline	90	1.5	acute	prefrontal-cortex	cortical prefrontal	ania3	ania3	4	4	increase	plt0.05	0.05	t-test	nr	SEM	nr	tx=4 rats per tx group. effectsize eyeballed		41	2003	12654518	main	cyclophilin	nr	rnase-protection-assay	percent-expressed-compared-to-baseline		cyclophilin	lsd	1.0	bs-vehicle	HOMER1
Nichols	1	rat	spraguedawley	nr	male	rnasepro	%control	510	lsd	1	saline	90	1.5	acute	pfc	cortical prefrontal	arc	arc	4	4	increase	plt0.01	0.05	t-test	nr	nr	nr	estimate from figure		4	2002	11927188	main	cypA	nr	rnase-protection	expression-%-of-control	%-of-control	cypA	lsd	1.0	bs-vehicle	arc
Nichols	1	rat	spraguedawley	nr	male	rnasepro	%control	120	lsd	1	saline	90	1.5	acute	hip	subcortical	arc	arc	4	4	increase	plt0.05	0.05	t-test	nr	nr	nr	estimate from figure		5	2002	11927188	main	cypA	nr	rnase-protection	expression-%-of-control	%-of-control	cypA	lsd	1.0	bs-vehicle	arc
Nichols	2	rat	sprague-dawley	nr	male	rnasepro	%control	300	lsd	1.0	saline	90	1.5	acute	prefrontal-cortex	cortical prefrontal	arc	arc	4	4	increase	plt0.05	0.05	t-test	nr	SEM	nr	tx=4 per tx group. effectsize eyeballed		3	2003	12654518	main	cyclophilin	nr	rnase-protection-assay	percent-expressed-compared-to-baseline		cyclophilin	lsd	1.0	bs-vehicle	arc
Nichols	4	rat	sprague-dawley	nr	male	rnasepro	%control	125	lsd	0.5	saline	90	1.5	acute	prefrontal-cortex	cortical prefrontal	arc	arc	4	4	increase	plt0.05	0.05	t-test	nr	SEM	nr	tx=4 per tx group. effectsize eyeballed		10	2003	12654518	main	cyclophilin	nr	rnase-protection-assay	percent-expressed-compared-to-baseline		cyclophilin	lsd	0.5	bs-vehicle	arc
Nichols	5	rat	sprague-dawley	nr	male	rnasepro	%control	500	lsd	1.0	saline	90	1.5	acute	prefrontal-cortex	cortical prefrontal	Arc	arc	4	3	increase	plt0.05	0.05	t-test	nr	SEM	nr	tx=3 independent samples pooled from groups of 4 rats. effectsize eyeballed		15	2003	12654518	main	cyclophilin	nr	rnase-protection-assay	percent-expressed-compared-to-baseline		cyclophilin	lsd	1.0	bs-vehicle	Arc
Nichols	6	rat	sprague-dawley	nr	male	rnasepro	%control	500	lsd	1.0	saline	90	1.5	acute	prefrontal-cortex	cortical prefrontal	Arc	arc	4	3	increase	plt0.05	0.05	t-test	nr	SEM	nr	tx=3 independent samples pooled from groups of 4 rats. effectsize eyeballed		28	2003	12654518	main	cyclophilin	nr	rnase-protection-assay	percent-expressed-compared-to-baseline		cyclophilin	lsd	1.0	bs-vehicle	Arc
Nichols	3	rat	sprague-dawley	nr	male	rnasepro	%control	300	lsd	1.0	saline	90	1.5	acute	prefrontal-cortex	cortical prefrontal	arc	arc	4	4	increase	plt0.05	0.05	t-test	nr	SEM	nr	tx=4 rats per tx group. effectsize eyeballed		42	2003	12654518	main	cyclophilin	nr	rnase-protection-assay	percent-expressed-compared-to-baseline		cyclophilin	lsd	1.0	bs-vehicle	arc
Nichols	1	rat	spraguedawley	nr	male	rtqpcr	%control	180	lsd	1	saline	90	1.5	acute	pFC	cortical prefrontal	C/EBP	c/ebp	4	4	increase	plt-0.05	0.05	t-test	nr	SEM	25	No t-stat value given; effect size (% change from control) estimated from plot; EffectSizeVarValue estimated from plot; expression levels measured relative to housekeeping gene.	x	1	2004	15255935	figure-1	gapdh	nr	RTqPCR	expression-%-of-control	expression-%-of-control	gapdh	LSD	1 mg/kg	BS-saline	CEBPB
Nichols	1	rat	spraguedawley	nr	male	rtqpcr	%control	155	lsd	1	saline	90	1.5	acute	midbrain	subcortical	C/EBP	c/ebp	4	4	increase	plt-0.05	0.05	t-test	nr	SEM	5	No t-stat value given; effect size (% change from control) estimated from plot; EffectSizeVarValue estimated from plot; expression levels measured relative to housekeeping gene.	x	7	2004	15255935	figure-1	gapdh	nr	RTqPCR	expression-%-of-control	expression-%-of-control	gapdh	LSD	1 mg/kg	BS-saline	CEBPB
Nichols	2	rat	spraguedawley	nr	male	rtqpcr	%control	180	lsd	1	saline	90	1.5	acute	pFC	cortical prefrontal	C/EBP	c/ebp	4	4	increase	plt-0.05	0.05	t-test	nr	SEM	25	No t-stat value given; effect size (% change from control) estimated from plot; EffectSizeVarValue estimated from plot; expression levels measured relative to housekeeping gene.	x	10	2004	15255935	figure-5	gapdh	nr	RTqPCR	expression-%-of-control	expression-%-of-control	gapdh	LSD	1 mg/kg	BS-saline	CEBPB
Nichols	1	rat	spraguedawley	nr	male	rnasepro	%control	225	lsd	1	saline	90	1.5	acute	pfc	cortical prefrontal	cfos	cfos	4	4	increase	plt0.01	0.05	t-test	nr	nr	nr	estimate from figure		1	2002	11927188	main	cypA	nr	rnase-protection	expression-%-of-control	%-of-control	cypA	lsd	1.0	bs-vehicle	fos
Nichols	1	rat	spraguedawley	nr	male	rnasepro	%control	195	lsd	1	saline	90	1.5	acute	hip	subcortical	cfos	cfos	4	4	increase	plt0.05	0.05	t-test	nr	nr	nr	estimate from figure		2	2002	11927188	main	cypA	nr	rnase-protection	expression-%-of-control	%-of-control	cypA	lsd	1.0	bs-vehicle	fos
Nichols	1	rat	spraguedawley	nr	male	rnasepro	%control	200	lsd	1	saline	90	1.5	acute	midbrain	subcortical	cfos	cfos	4	4	increase	plt0.01	0.05	t-test	nr	nr	nr	estimate from figure		3	2002	11927188	main	cypA	nr	rnase-protection	expression-%-of-control	%-of-control	cypA	lsd	1.0	bs-vehicle	fos
Nichols	2	rat	sprague-dawley	nr	male	rnasepro	%control	150	lsd	1.0	saline	90	1.5	acute	prefrontal-cortex	cortical prefrontal	cfos	cfos	4	4	increase	plt0.05	0.05	t-test	nr	SEM	nr	tx=4 per tx group. effectsize eyeballed		4	2003	12654518	main	cyclophilin	nr	rnase-protection-assay	percent-expressed-compared-to-baseline		cyclophilin	lsd	1.0	bs-vehicle	fos
Nichols	4	rat	sprague-dawley	nr	male	rnasepro	%control	125	lsd	0.5	saline	90	1.5	acute	prefrontal-cortex	cortical prefrontal	cfos	cfos	4	4	increase	plt0.05	0.05	t-test	nr	SEM	nr	tx=4 per tx group. effectsize eyeballed		11	2003	12654518	main	cyclophilin	nr	rnase-protection-assay	percent-expressed-compared-to-baseline		cyclophilin	lsd	0.5	bs-vehicle	fos
Nichols	5	rat	sprague-dawley	nr	male	rnasepro	%control	215	lsd	1.0	saline	90	1.5	acute	prefrontal-cortex	cortical prefrontal	cFos	cfos	4	3	increase	plt0.05	0.05	t-test	nr	SEM	nr	tx=3 independent samples pooled from groups of 4 rats. effectsize eyeballed		17	2003	12654518	main	cyclophilin	nr	rnase-protection-assay	percent-expressed-compared-to-baseline		cyclophilin	lsd	1.0	bs-vehicle	fos
Nichols	6	rat	sprague-dawley	nr	male	rnasepro	%control	200	lsd	1.0	saline	90	1.5	acute	prefrontal-cortex	cortical prefrontal	cFos	cfos	4	3	increase	plt0.05	0.05	t-test	nr	SEM	nr	tx=3 independent samples pooled from groups of 4 rats. effectsize eyeballed		29	2003	12654518	main	cyclophilin	nr	rnase-protection-assay	percent-expressed-compared-to-baseline		cyclophilin	lsd	1.0	bs-vehicle	fos
Nichols	6	rat	sprague-dawley	nr	male	rnasepro	%control	125	lsd	0.5	saline	90	1.5	acute	prefrontal-cortex	cortical prefrontal	cFos	cfos	4	4	increase	plt0.05	0.05	t-test	nr	SEM	nr	tx=4 independent rats. effectsize eyeballed		30	2003	12654518	main	cyclophilin	nr	rnase-protection-assay	percent-expressed-compared-to-baseline		cyclophilin	lsd	0.5	bs-vehicle	fos
Nichols	3	rat	sprague-dawley	nr	male	rnasepro	%control	175	lsd	1.0	saline	90	1.5	acute	prefrontal-cortex	cortical prefrontal	cfos	cfos	4	4	increase	plt0.05	0.05	t-test	nr	SEM	nr	tx=4 rats per tx group. effectsize eyeballed		43	2003	12654518	main	cyclophilin	nr	rnase-protection-assay	percent-expressed-compared-to-baseline		cyclophilin	lsd	1.0	bs-vehicle	fos
Nichols	1	rat	sprague-dawley	nr	male	rnasepro	%control	32	lsd	1.0	saline	90	1.5	acute	prefrontal-cortex	cortical prefrontal	homer1a	homer1a	3	3	increase	plt0.05	0.05	t-test	nr	SEM	11	tx=3 independent batches of 4 animals each, pooled.		1	2003	12654518	main	cyclophilin	nr	rnase-protection-assay	percent-expressed-compared-to-baseline		cyclophilin	lsd	1.0	bs-vehicle	HOMER1
Nichols	2	rat	spraguedawley	nr	male	rnasepro	%control	170	lsd	1	saline	90	1.5	acute	pfc	cortical prefrontal	IkB	ikb	4	4	increase	plt0.01	0.05	t-test	nr	nr	nr	estimate from figure		9	2002	11927188	main	cypA	nr	rnase-protection	expression-%-of-control	%-of-control	cypA	lsd	1.0	bs-vehicle	nfkbia
Nichols	2	rat	spraguedawley	nr	male	rnasepro	%control	170	lsd	1	saline	90	1.5	acute	hip	subcortical	IkB	ikb	4	4	increase	plt0.01	0.05	t-test	nr	nr	nr	estimate from figure		10	2002	11927188	main	cypA	nr	rnase-protection	expression-%-of-control	%-of-control	cypA	lsd	1.0	bs-vehicle	nfkbia
Nichols	2	rat	spraguedawley	nr	male	rnasepro	%control	185	lsd	1	saline	90	1.5	acute	midbrain	subcortical	IkB	ikb	4	4	increase	plt0.01	0.05	t-test	nr	nr	nr	estimate from figure		11	2002	11927188	main	cypA	nr	rnase-protection	expression-%-of-control	%-of-control	cypA	lsd	1.0	bs-vehicle	nfkbia
Nichols	2	rat	sprague-dawley	nr	male	rnasepro	%control	200	lsd	1.0	saline	90	1.5	acute	prefrontal-cortex	cortical prefrontal	IkB	ikb	4	4	increase	plt0.05	0.05	t-test	nr	SEM	nr	tx=4 per tx group. effectsize eyeballed		5	2003	12654518	main	cyclophilin	nr	rnase-protection-assay	percent-expressed-compared-to-baseline		cyclophilin	lsd	1.0	bs-vehicle	nfkbia
Nichols	5	rat	sprague-dawley	nr	male	rnasepro	%control	200	lsd	1.0	saline	90	1.5	acute	prefrontal-cortex	cortical prefrontal	IkB	ikb	4	3	increase	plt0.05	0.05	t-test	nr	SEM	nr	tx=3 independent samples pooled from groups of 4 rats. effectsize eyeballed		19	2003	12654518	main	cyclophilin	nr	rnase-protection-assay	percent-expressed-compared-to-baseline		cyclophilin	lsd	1.0	bs-vehicle	nfkbia
Nichols	6	rat	sprague-dawley	nr	male	rnasepro	%control	175	lsd	0.5	saline	90	1.5	acute	prefrontal-cortex	cortical prefrontal	IkB	ikb	4	4	increase	plt0.05	0.05	t-test	nr	SEM	nr	tx=4 independent rats. effectsize eyeballed		31	2003	12654518	main	cyclophilin	nr	rnase-protection-assay	percent-expressed-compared-to-baseline		cyclophilin	lsd	0.5	bs-vehicle	nfkbia
Nichols	6	rat	sprague-dawley	nr	male	rnasepro	%control	200	lsd	1.0	saline	90	1.5	acute	prefrontal-cortex	cortical prefrontal	IkB	ikb	4	3	increase	plt0.05	0.05	t-test	nr	SEM	nr	tx=3 independent samples pooled from groups of 4 rats. effectsize eyeballed		32	2003	12654518	main	cyclophilin	nr	rnase-protection-assay	percent-expressed-compared-to-baseline		cyclophilin	lsd	1.0	bs-vehicle	nfkbia
Nichols	6	rat	sprague-dawley	nr	male	rnasepro	%control	130	lsd	0.25	saline	90	1.5	acute	prefrontal-cortex	cortical prefrontal	IkB	ikb	4	4	increase	plt0.05	0.05	t-test	nr	SEM	nr	tx=4 independent rats. effectsize eyeballed		33	2003	12654518	main	cyclophilin	nr	rnase-protection-assay	percent-expressed-compared-to-baseline		cyclophilin	lsd	0.25	bs-vehicle	nfkbia
Nichols	3	rat	sprague-dawley	nr	male	rnasepro	%control	175	lsd	1.0	saline	90	1.5	acute	prefrontal-cortex	cortical prefrontal	IkB	ikb	4	4	increase	plt0.05	0.05	t-test	nr	SEM	nr	tx=4 rats per tx group. effectsize eyeballed		44	2003	12654518	main	cyclophilin	nr	rnase-protection-assay	percent-expressed-compared-to-baseline		cyclophilin	lsd	1.0	bs-vehicle	nfkbia
Nichols	1	rat	spraguedawley	nr	male	rtqpcr	%control	215	lsd	1	saline	90	1.5	acute	pFC	cortical prefrontal	ILAD-1	ilad1	4	4	increase	plt-0.05	0.05	t-test	nr	SEM	25	No t-stat value given; effect size (% change from control) estimated from plot; EffectSizeVarValue estimated from plot; expression levels measured relative to housekeeping gene.	x	3	2004	15255935	figure-1	gapdh	nr	RTqPCR	expression-%-of-control	expression-%-of-control	gapdh	LSD	1 mg/kg	BS-saline	ilad1
Nichols	1	rat	spraguedawley	nr	male	rtqpcr	%control	175	lsd	1	saline	90	1.5	acute	hippocampus	subcortical	ILAD-1	ilad1	4	4	increase	plt-0.05	0.05	t-test	nr	SEM	20	No t-stat value given; effect size (% change from control) estimated from plot; EffectSizeVarValue estimated from plot; expression levels measured relative to housekeeping gene.	x	6	2004	15255935	figure-1	gapdh	nr	RTqPCR	expression-%-of-control	expression-%-of-control	gapdh	LSD	1 mg/kg	BS-saline	ilad1
Nichols	1	rat	spraguedawley	nr	male	rtqpcr	%control	230	lsd	1	saline	90	1.5	acute	midbrain	subcortical	ILAD-1	ilad1	4	4	increase	plt-0.05	0.05	t-test	nr	SEM	15	No t-stat value given; effect size (% change from control) estimated from plot; EffectSizeVarValue estimated from plot; EffectSizeVarValue estimated from plot; expression levels measured relative to housekeeping gene in saline group.	x	9	2004	15255935	figure-1	gapdh	nr	RTqPCR	expression-%-of-control	expression-%-of-control	gapdh	LSD	1 mg/kg	BS-saline	ilad1
Nichols	2	rat	spraguedawley	nr	male	rtqpcr	%control	160	lsd	1	saline	90	1.5	acute	pFC	cortical prefrontal	ILAD-1	ilad1	4	4	increase	plt-0.05	0.05	t-test	nr	SEM	5	No t-stat value given; effect size (% change from control) estimated from plot; EffectSizeVarValue estimated from plot; expression levels measured relative to housekeeping gene.	x	12	2004	15255935	figure-5	gapdh	nr	RTqPCR	expression-%-of-control	expression-%-of-control	gapdh	LSD	1 mg/kg	BS-saline	ilad1
Nichols	2	rat	spraguedawley	nr	male	rnasepro	%control	205	lsd	1	saline	90	1.5	acute	pfc	cortical prefrontal	krox20	krox20	4	4	increase	plt0.01	0.05	t-test	nr	nr	nr	estimate from figure		16	2002	11927188	main	cypA	nr	rnase-protection	expression-%-of-control	%-of-control	cypA	lsd	1.0	bs-vehicle	egr2
Nichols	2	rat	spraguedawley	nr	male	rnasepro	%control	210	lsd	1	saline	90	1.5	acute	hip	subcortical	krox20	krox20	4	4	increase	plt0.05	0.05	t-test	nr	nr	nr	estimate from figure		17	2002	11927188	main	cypA	nr	rnase-protection	expression-%-of-control	%-of-control	cypA	lsd	1.0	bs-vehicle	egr2
Nichols	2	rat	sprague-dawley	nr	male	rnasepro	%control	200	lsd	1.0	saline	90	1.5	acute	prefrontal-cortex	cortical prefrontal	krox-20	krox20	4	4	increase	plt0.05	0.05	t-test	nr	SEM	nr	tx=4 per tx group. effectsize eyeballed		6	2003	12654518	main	cyclophilin	nr	rnase-protection-assay	percent-expressed-compared-to-baseline		cyclophilin	lsd	1.0	bs-vehicle	egr2
Nichols	5	rat	sprague-dawley	nr	male	rnasepro	%control	200	lsd	1.0	saline	90	1.5	acute	prefrontal-cortex	cortical prefrontal	Krox-20	krox20	4	3	increase	plt0.05	0.05	t-test	nr	SEM	nr	tx=3 independent samples pooled from groups of 4 rats. effectsize eyeballed		21	2003	12654518	main	cyclophilin	nr	rnase-protection-assay	percent-expressed-compared-to-baseline		cyclophilin	lsd	1.0	bs-vehicle	egr2
Nichols	6	rat	sprague-dawley	nr	male	rnasepro	%control	125	lsd	0.25	saline	90	1.5	acute	prefrontal-cortex	cortical prefrontal	Krox-20	krox20	4	4	increase	plt0.05	0.05	t-test	nr	SEM	nr	tx=4 independent rats. effectsize eyeballed		34	2003	12654518	main	cyclophilin	nr	rnase-protection-assay	percent-expressed-compared-to-baseline		cyclophilin	lsd	0.25	bs-vehicle	egr2
Nichols	6	rat	sprague-dawley	nr	male	rnasepro	%control	200	lsd	0.5	saline	90	1.5	acute	prefrontal-cortex	cortical prefrontal	Krox-20	krox20	4	4	increase	plt0.05	0.05	t-test	nr	SEM	nr	tx=4 independent rats. effectsize eyeballed		35	2003	12654518	main	cyclophilin	nr	rnase-protection-assay	percent-expressed-compared-to-baseline		cyclophilin	lsd	0.5	bs-vehicle	egr2
Nichols	6	rat	sprague-dawley	nr	male	rnasepro	%control	200	lsd	1.0	saline	90	1.5	acute	prefrontal-cortex	cortical prefrontal	Krox-20	krox20	4	3	increase	plt0.05	0.05	t-test	nr	SEM	nr	tx=3 independent samples pooled from groups of 4 rats. effectsize eyeballed		36	2003	12654518	main	cyclophilin	nr	rnase-protection-assay	percent-expressed-compared-to-baseline		cyclophilin	lsd	1.0	bs-vehicle	egr2
Nichols	3	rat	sprague-dawley	nr	male	rnasepro	%control	200	lsd	1.0	saline	90	1.5	acute	prefrontal-cortex	cortical prefrontal	krox-20	krox20	4	4	increase	plt0.05	0.05	t-test	nr	SEM	nr	tx=4 rats per tx group. effectsize eyeballed		45	2003	12654518	main	cyclophilin	nr	rnase-protection-assay	percent-expressed-compared-to-baseline		cyclophilin	lsd	1.0	bs-vehicle	egr2
Nichols	1	rat	spraguedawley	nr	male	rtqpcr	%control	180	lsd	1	saline	90	1.5	acute	pFC	cortical prefrontal	MKP-1	mkp1	4	4	increase	plt-0.05	0.05	t-test	nr	SEM	15	No t-stat value given; effect size (% change from control) estimated from plot; EffectSizeVarValue estimated from plot; expression levels measured relative to housekeeping gene.	x	2	2004	15255935	figure-1	gapdh	nr	RTqPCR	expression-%-of-control	expression-%-of-control	gapdh	LSD	1 mg/kg	BS-saline	DUSP1
Nichols	1	rat	spraguedawley	nr	male	rtqpcr	%control	260	lsd	1	saline	90	1.5	acute	hippocampus	subcortical	MKP-1	mkp1	4	4	increase	plt-0.05	0.05	t-test	nr	SEM	20	No t-stat value given; effect size (% change from control) estimated from plot; EffectSizeVarValue estimated from plot; expression levels measured relative to housekeeping gene.	x	5	2004	15255935	figure-1	gapdh	nr	RTqPCR	expression-%-of-control	expression-%-of-control	gapdh	LSD	1 mg/kg	BS-saline	DUSP1
Nichols	1	rat	spraguedawley	nr	male	rtqpcr	%control	205	lsd	1	saline	90	1.5	acute	midbrain	subcortical	MKP-1	mkp1	4	4	increase	plt-0.05	0.05	t-test	nr	SEM	5	No t-stat value given; effect size (% change from control) estimated from plot; EffectSizeVarValue estimated from plot; expression levels measured relative to housekeeping gene.	x	8	2004	15255935	figure-1	gapdh	nr	RTqPCR	expression-%-of-control	expression-%-of-control	gapdh	LSD	1 mg/kg	BS-saline	DUSP1
Nichols	2	rat	spraguedawley	nr	male	rtqpcr	%control	195	lsd	1	saline	90	1.5	acute	PFC	cortical prefrontal	MKP-1	mkp1	4	4	increase	plt-0.05	0.05	t-test	nr	SEM	13	No t-stat value given; effect size (% change from control) estimated from plot; EffectSizeVarValue estimated from plot; expression levels measured relative to housekeeping gene.	x	11	2004	15255935	figure-5	gapdh	nr	RTqPCR	expression-%-of-control	expression-%-of-control	gapdh	LSD	1 mg/kg	BS-saline	DUSP1
Nichols	2	rat	spraguedawley	nr	male	rnasepro	%control	145	lsd	1	saline	90	1.5	acute	pfc	cortical prefrontal	nor1	nor1	4	4	increase	plt0.05	0.05	t-test	nr	nr	nr	estimate from figure		12	2002	11927188	main	cypA	nr	rnase-protection	expression-%-of-control	%-of-control	cypA	lsd	1.0	bs-vehicle	nr4a3
Nichols	2	rat	spraguedawley	nr	male	rnasepro	%control	175	lsd	1	saline	90	1.5	acute	midbrain	subcortical	nor1	nor1	4	4	increase	plt0.05	0.05	t-test	nr	nr	nr	estimate from figure		13	2002	11927188	main	cypA	nr	rnase-protection	expression-%-of-control	%-of-control	cypA	lsd	1.0	bs-vehicle	nr4a3
Nichols	2	rat	sprague-dawley	nr	male	rnasepro	%control	200	lsd	1.0	saline	90	1.5	acute	prefrontal-cortex	cortical prefrontal	Nor1	nor1	4	4	increase	plt0.05	0.05	t-test	nr	SEM	nr	tx=4 per tx group. effectsize eyeballed		7	2003	12654518	main	cyclophilin	nr	rnase-protection-assay	percent-expressed-compared-to-baseline		cyclophilin	lsd	1.0	bs-vehicle	nr4a3
Nichols	4	rat	sprague-dawley	nr	male	rnasepro	%control	125	lsd	0.5	saline	90	1.5	acute	prefrontal-cortex	cortical prefrontal	Nor1	nor1	4	4	increase	plt0.05	0.05	t-test	nr	SEM	nr	tx=4 per tx group. effectsize eyeballed		12	2003	12654518	main	cyclophilin	nr	rnase-protection-assay	percent-expressed-compared-to-baseline		cyclophilin	lsd	0.5	bs-vehicle	nr4a3
Nichols	5	rat	sprague-dawley	nr	male	rnasepro	%control	176	lsd	1.0	saline	90	1.5	acute	prefrontal-cortex	cortical prefrontal	Nor1	nor1	4	3	increase	plt0.05	0.05	t-test	nr	SEM	26	tx=3 independent samples pooled from groups of 4 rats.		23	2003	12654518	main	cyclophilin	nr	rnase-protection-assay	percent-expressed-compared-to-baseline		cyclophilin	lsd	1.0	bs-vehicle	nr4a3
Nichols	6	rat	sprague-dawley	nr	male	rnasepro	%control	175	lsd	1.0	saline	90	1.5	acute	prefrontal-cortex	cortical prefrontal	Nor1	nor1	4	3	increase	plt0.05	0.05	t-test	nr	SEM	nr	tx=3 independent samples pooled from groups of 4 rats. effectsize eyeballed		37	2003	12654518	main	cyclophilin	nr	rnase-protection-assay	percent-expressed-compared-to-baseline		cyclophilin	lsd	1.0	bs-vehicle	nr4a3
Nichols	6	rat	sprague-dawley	nr	male	rnasepro	%control	125	lsd	0.5	saline	90	1.5	acute	prefrontal-cortex	cortical prefrontal	Nor1	nor1	4	4	increase	plt0.05	0.05	t-test	nr	SEM	nr	tx=4 independent rats. effectsize eyeballed		38	2003	12654518	main	cyclophilin	nr	rnase-protection-assay	percent-expressed-compared-to-baseline		cyclophilin	lsd	0.5	bs-vehicle	nr4a3
Nichols	3	rat	sprague-dawley	nr	male	rnasepro	%control	275	lsd	1.0	saline	90	1.5	acute	prefrontal-cortex	cortical prefrontal	Nor1	nor1	4	4	increase	plt0.05	0.05	t-test	nr	SEM	nr	tx=4 rats per tx group. effectsize eyeballed		46	2003	12654518	main	cyclophilin	nr	rnase-protection-assay	percent-expressed-compared-to-baseline		cyclophilin	lsd	1.0	bs-vehicle	nr4a3
Nichols	2	rat	spraguedawley	nr	male	rnasepro	%control	220	lsd	1	saline	90	1.5	acute	pfc	cortical prefrontal	sgk	sgk	4	4	increase	plt0.01	0.05	t-test	nr	nr	nr	estimate from figure		6	2002	11927188	main	cypA	nr	rnase-protection	expression-%-of-control	%-of-control	cypA	lsd	1.0	bs-vehicle	sgk1
Nichols	2	rat	spraguedawley	nr	male	rnasepro	%control	210	lsd	1	saline	90	1.5	acute	hip	subcortical	sgk	sgk	4	4	increase	plt0.01	0.05	t-test	nr	nr	nr	estimate from figure		7	2002	11927188	main	cypA	nr	rnase-protection	expression-%-of-control	%-of-control	cypA	lsd	1.0	bs-vehicle	sgk1
Nichols	2	rat	spraguedawley	nr	male	rnasepro	%control	160	lsd	1	saline	90	1.5	acute	midbrain	subcortical	sgk	sgk	4	4	increase	plt0.001	0.05	t-test	nr	nr	nr	estimate from figure		8	2002	11927188	main	cypA	nr	rnase-protection	expression-%-of-control	%-of-control	cypA	lsd	1.0	bs-vehicle	sgk1
Nichols	2	rat	sprague-dawley	nr	male	rnasepro	%control	250	lsd	1.0	saline	90	1.5	acute	prefrontal-cortex	cortical prefrontal	sgk	sgk	4	4	increase	plt0.05	0.05	t-test	nr	SEM	nr	tx=4 per tx group. effectsize eyeballed		8	2003	12654518	main	cyclophilin	nr	rnase-protection-assay	percent-expressed-compared-to-baseline		cyclophilin	lsd	1.0	bs-vehicle	sgk1
Nichols	5	rat	sprague-dawley	nr	male	rnasepro	%control	220	lsd	1.0	saline	90	1.5	acute	prefrontal-cortex	cortical prefrontal	sgk	sgk	4	3	increase	plt0.05	0.05	t-test	nr	SEM	nr	tx=3 independent samples pooled from groups of 4 rats. effectsize eyeballed		25	2003	12654518	main	cyclophilin	nr	rnase-protection-assay	percent-expressed-compared-to-baseline		cyclophilin	lsd	1.0	bs-vehicle	sgk1
Nichols	6	rat	sprague-dawley	nr	male	rnasepro	%control	125	lsd	0.5	saline	90	1.5	acute	prefrontal-cortex	cortical prefrontal	sgk	sgk	4	4	increase	plt0.05	0.05	t-test	nr	SEM	nr	tx=4 independent rats. effectsize eyeballed		39	2003	12654518	main	cyclophilin	nr	rnase-protection-assay	percent-expressed-compared-to-baseline		cyclophilin	lsd	0.5	bs-vehicle	sgk1
Nichols	6	rat	sprague-dawley	nr	male	rnasepro	%control	225	lsd	1.0	saline	90	1.5	acute	prefrontal-cortex	cortical prefrontal	sgk	sgk	4	3	increase	plt0.05	0.05	t-test	nr	SEM	nr	tx=3 independent samples pooled from groups of 4 rats. effectsize eyeballed		40	2003	12654518	main	cyclophilin	nr	rnase-protection-assay	percent-expressed-compared-to-baseline		cyclophilin	lsd	1.0	bs-vehicle	sgk1
Nichols	3	rat	sprague-dawley	nr	male	rnasepro	%control	200	lsd	1.0	saline	90	1.5	acute	prefrontal-cortex	cortical prefrontal	sgk	sgk	4	4	increase	plt0.05	0.05	t-test	nr	SEM	nr	tx=4 rats per tx group. effectsize eyeballed		47	2003	12654518	main	cyclophilin	nr	rnase-protection-assay	percent-expressed-compared-to-baseline		cyclophilin	lsd	1.0	bs-vehicle	sgk1
Tilakaratne	1	rat	spraguedawley	nr	male	northernblot	%control	327	doi	4	saline	90	1.5	acute	cortex	cortical prefrontal	c-fos	cfos	4	4	increase	plt-0.05	0.05-tt	F-test	nr	SE	20	SE was eyeballed from figure		1	1996	8832223	fig.3	na	nr	northern-blot	mrna-percent-stimulation-above-control	mrna-percent-stimulation-above-control	na	doi	4.0	bs-vehicle	fos
Tilakaratne	1	rat	spraguedawley	nr	male	northernblot	%control	281	doi	4	saline	90	1.5	acute	hippocampus	subcortical	c-fos	cfos	4	4	increase	plt-0.05	0.05-tt	F-test	nr	SE	20	SE was eyeballed from figure		2	1996	8832223	fig.3	na	nr	northern-blot	mrna-percent-stimulation-above-control	mrna-percent-stimulation-above-control	na	doi	4.0	bs-vehicle	fos
Tilakaratne	1	rat	spraguedawley	nr	male	northernblot	%control	190	doi	4	saline	90	1.5	acute	cerebellum	subcortical	c-fos	cfos	4	4	increase	plt-0.05	0.05-tt	F-test	nr	SE	20	SE was eyeballed from figure		3	1996	8832223	fig.3	na	nr	northern-blot	mrna-percent-stimulation-above-control	mrna-percent-stimulation-above-control	na	doi	4.0	bs-vehicle	fos
Tilakaratne	1	rat	spraguedawley	nr	male	northernblot	%control	290	doi	4	saline	90	1.5	acute	cortex	cortical prefrontal	ngflc	ngflc	4	4	increase	plt-0.05	0.05-tt	F-test	nr	SE	10	SE was eyeballed from figure		4	1996	8832223	fig.3	na	nr	northern-blot	mrna-percent-stimulation-above-control	mrna-percent-stimulation-above-control	na	doi	4.0	bs-vehicle	ngflc
Tilakaratne	1	rat	spraguedawley	nr	male	northernblot	%control	233	doi	4	saline	90	1.5	acute	hippocampus	subcortical	ngflc	ngflc	4	4	increase	plt-0.05	0.05-tt	F-test	nr	SE	30	SE was eyeballed from figure		5	1996	8832223	fig.3	na	nr	northern-blot	mrna-percent-stimulation-above-control	mrna-percent-stimulation-above-control	na	doi	4.0	bs-vehicle	ngflc
Tilakaratne	1	rat	spraguedawley	nr	male	northernblot	%control	290	doi	4	saline	90	1.5	acute	cerebellum	subcortical	ngflc	ngflc	4	4	increase	plt-0.05	0.05-tt	F-test	nr	SE	10	Effect size and SE was eyeballed from figure		6	1996	8832223	fig.3	na	nr	northern-blot	mrna-percent-stimulation-above-control	mrna-percent-stimulation-above-control	na	doi	4.0	bs-vehicle	ngflc
Tilakaratne	1	rat	spraguedawley	nr	male	northernblot	%control	219	doi	4	saline	90	1.5	acute	cortex	cortical prefrontal	tis1	tis1	4	4	increase	plt-0.05	0.05-tt	F-test	nr	SE	20	SE was eyeballed from figure		7	1996	8832223	fig.3	na	nr	northern-blot	mrna-percent-stimulation-above-control	mrna-percent-stimulation-above-control	na	doi	4.0	bs-vehicle	tia1
Tilakaratne	1	rat	spraguedawley	nr	male	northernblot	%control	125	doi	4	saline	90	1.5	acute	cerebellum	subcortical	tis1	tis1	4	4	increase	plt-0.05	0.05-tt	F-test	nr	SE	20	SE was eyeballed from figure		8	1996	8832223	fig.3	na	nr	northern-blot	mrna-percent-stimulation-above-control	mrna-percent-stimulation-above-control	na	doi	4.0	bs-vehicle	tia1
Martin	1	rat	spraguedawley	nr	male	rtqpcr	dCTvControl	4.59479	doi	6	saline	105	1.75	acute	ssc	cortical sensory	cfos	cfos	4-5	4-5	increase	plt0.01	0.05	f-test	nr	nr	nr	eyeball-dCT-from-figure		3	2016	27649637	main	gapdh	nr	rt-qpcr	dCT-gene-to-control	dCT-gene-to-control	gapdh	doi	6.0	bs-saline	fos
Martin	5	rat	sprague-dawley	nr	male	rtqpcr	dCTvControl	2.46229	doi	6.0	saline	105	1.75	acute	Non-neurons-mPFC	cell culture	Fos	cfos	3-5	3-5	increase	plt-0.01	0.05	T-test	nr	nr	DOI=0.2; CON=0.2	Effect size and variation was eyeballed from figure. Data was collected from non-neurons.		1	2016	27649637	FigureS2	gapdh	nr	rt-qpcr	dCT-gene-to-control		gapdh	doi	6.0	bs-saline	Fos
Martin	5	rat	sprague-dawley	nr	male	rtqpcr	dCTvControl	2.82843	doi	6.0	saline	105	1.75	acute	Non-neurons-SSC	cell culture	Fos	cfos	3-5	3-5	increase	plt-0.01	0.05	T-test	nr	nr	DOI=0.2; CON=0.2	Effect size and variation was eyeballed from figure. Data was collected from non-neurons.		2	2016	27649637	FigureS2	gapdh	nr	rt-qpcr	dCT-gene-to-control		gapdh	doi	6.0	bs-saline	Fos
Martin	5	rat	sprague-dawley	nr	male	rtqpcr	dCTvControl	2	doi	6.0	saline	105	1.75	acute	Astrocytes-mPFC	cell culture	Fos	cfos	3-5	3-5	increase	plt-0.05	0.05	T-test	nr	nr	DOI=0.3; CON=0.3	Effect size and variation was eyeballed from figure. Data was collected from non-neurons.		3	2016	27649637	FigureS2	gapdh	nr	rt-qpcr	dCT-gene-to-control		gapdh	doi	6.0	bs-saline	Fos
Martin	5	rat	sprague-dawley	nr	male	rtqpcr	dCTvControl	3.4822	doi	6.0	saline	105	1.75	acute	Astrocytes-SSC	cell culture	Fos	cfos	3-5	3-5	increase	plt-0.05	0.05	T-test	nr	nr	DOI=0.4; CON=0.4	Effect size and variation was eyeballed from figure. Data was collected from non-neurons.		4	2016	27649637	FigureS2	gapdh	nr	rt-qpcr	dCT-gene-to-control		gapdh	doi	6.0	bs-saline	Fos
Martin	1	rat	spraguedawley	nr	male	rtqpcr	dCTvControl	9.18959	doi	6	saline	105	1.75	acute	mpfc	cortical prefrontal	fosb	cfosb	4-5	4-5	increase	plt0.001	0.05	f-test	nr	nr	nr	eyeball-dCT-from-figure		1	2016	27649637	main	gapdh	nr	rt-qpcr	dCT-gene-to-control	dCT-gene-to-control	gapdh	doi	6.0	bs-saline	fos
Martin	1	rat	spraguedawley	nr	male	rtqpcr	dCTvControl	17.1484	doi	6	saline	105	1.75	acute	ssc	cortical sensory	fosb	cfosb	4-5	4-5	increase	plt0.001	0.05	f-test	nr	nr	nr	eyeball-dCT-from-figure		4	2016	27649637	main	gapdh	nr	rt-qpcr	dCT-gene-to-control	dCT-gene-to-control	gapdh	doi	6.0	bs-saline	fos
Martin	1	rat	spraguedawley	nr	male	rtqpcr	dCTvControl	0.003173	doi	6	saline	105	1.75	acute	mpfc	cortical prefrontal	egr2	egr2	4-5	4-5	increase	plt0.05	0.05	f-test	nr	nr	nr	eyeball-dCT-from-figure		2	2016	27649637	main	gapdh	nr	rt-qpcr	dCT-gene-to-control	dCT-gene-to-control	gapdh	doi	6.0	bs-saline	egr2
Martin	1	rat	spraguedawley	nr	male	rtqpcr	dCTvControl	3.4822	doi	6	saline	105	1.75	acute	ssc	cortical sensory	egr2	egr2	4-5	4-5	increase	plt0.05	0.05	f-test	nr	nr	nr	eyeball-dCT-from-figure		5	2016	27649637	main	gapdh	nr	rt-qpcr	dCT-gene-to-control	dCT-gene-to-control	gapdh	doi	6.0	bs-saline	egr2
Martin	3	rat	spraguedawley	nr	male	rtqpcr	dCTvControl	4.59479	doi	6	saline	105	1.75	acute	mpfc	cortical prefrontal	gad67	gad67	4-5	4-5	increase	plt0.05	0.05	f-test	nr	nr	nr	eyeball-dCT-from-figure		9	2016	27649637	main	gapdh	nr	rt-qpcr	dCT-gene-to-control	dCT-gene-to-control	gapdh	doi	6.0	bs-saline	gad1
Martin	3	rat	spraguedawley	nr	male	rtqpcr	dCTvControl	32	doi	6	saline	105	1.75	acute	ssc	cortical sensory	gad67	gad67	4-5	4-5	increase	plt0.001	0.05	f-test	nr	nr	nr	eyeball-dCT-from-figure		12	2016	27649637	main	gapdh	nr	rt-qpcr	dCT-gene-to-control	dCT-gene-to-control	gapdh	doi	6.0	bs-saline	gad1
Martin	2	rat	spraguedawley	nr	male	rtqpcr	dCTvControl	1.86607	doi	6	saline	105	1.75	acute	ssc	cortical sensory	grm2	grm2	4-5	4-5	increase	plt0.05	0.05	f-test	nr	nr	nr	eyeball-dCT-from-figure		8	2016	27649637	main	gapdh	nr	rt-qpcr	dCT-gene-to-control	dCT-gene-to-control	gapdh	doi	6.0	bs-saline	grm2
Martin	2	rat	spraguedawley	nr	male	rtqpcr	dCTvControl	2.63902	doi	6	saline	105	1.75	acute	mpfc	cortical prefrontal	ht2ra	ht2ra	4-5	4-5	increase	plt0.01	0.05	f-test	nr	nr	nr	eyeball-dCT-from-figure		6	2016	27649637	main	gapdh	nr	rt-qpcr	dCT-gene-to-control	dCT-gene-to-control	gapdh	doi	6.0	bs-saline	htr2a
Martin	2	rat	spraguedawley	nr	male	rtqpcr	dCTvControl	3.4822	doi	6	saline	105	1.75	acute	ssc	cortical sensory	ht2ra	ht2ra	4-5	4-5	increase	plt0.001	0.05	f-test	nr	nr	nr	eyeball-dCT-from-figure		7	2016	27649637	main	gapdh	nr	rt-qpcr	dCT-gene-to-control	dCT-gene-to-control	gapdh	doi	6.0	bs-saline	htr2a
Martin	5	rat	sprague-dawley	nr	male	rtqpcr	dCTvControl	4.92458	doi	6.0	saline	105	1.75	acute	Non-Neurons-SSC	cell culture	Per1	per1	3-5	3-5	increase	plt-0.01	0.05	T-test	nr	nr	DOI=0.2; CON=0.2	Effect size and variation was eyeballed from figure. Data was collected from non-neurons.		5	2016	27649637	FigureS2	gapdh	nr	rt-qpcr	dCT-gene-to-control		gapdh	doi	6.0	bs-saline	Per1
Martin	5	rat	sprague-dawley	nr	male	rtqpcr	dCTvControl	5.27803	doi	6.0	saline	105	1.75	acute	Non-Neurons-SSC	cell culture	Per1	per1	3-5	3-5	increase	plt-0.001	0.05	T-test	nr	nr	DOI=0.1; CON=0.2	Effect size and variation was eyeballed from figure. Data was collected from non-neurons.		6	2016	27649637	FigureS2	gapdh	nr	rt-qpcr	dCT-gene-to-control		gapdh	doi	6.0	bs-saline	Per1
Martin	5	rat	sprague-dawley	nr	male	rtqpcr	dCTvControl	1.41421	doi	6.0	saline	105	1.75	acute	Astrocytes-mPFC	cell culture	Per1	per1	3-5	3-5	increase	plt-0.05	0.05	T-test	nr	nr	DOI=0.2; CON=0.4	Effect size and variation was eyeballed from figure. Data was collected from non-neurons.		7	2016	27649637	FigureS2	gapdh	nr	rt-qpcr	dCT-gene-to-control		gapdh	doi	6.0	bs-saline	Per1
Martin	5	rat	sprague-dawley	nr	male	rtqpcr	dCTvControl	2.82843	doi	6.0	saline	105	1.75	acute	Astrocytes-SSC	cell culture	Per1	per1	3-5	3-5	increase	plt-0.05	0.05	T-test	nr	nr	DOI=0.2; CON=0.2	Effect size and variation was eyeballed from figure. Data was collected from non-neurons.		8	2016	27649637	FigureS2	gapdh	nr	rt-qpcr	dCT-gene-to-control		gapdh	doi	6.0	bs-saline	Per1
Martin	3	rat	spraguedawley	nr	male	rtqpcr	dCTvControl	3.03143	doi	6	saline	105	1.75	acute	mpfc	cortical prefrontal	pvlb	pvlb	4-5	4-5	increase	plt0.05	0.05	f-test	nr	nr	nr	eyeball-dCT-from-figure		11	2016	27649637	main	gapdh	nr	rt-qpcr	dCT-gene-to-control	dCT-gene-to-control	gapdh	doi	6.0	bs-saline	pvalb
Martin	3	rat	spraguedawley	nr	male	rtqpcr	dCTvControl	2.46229	doi	6	saline	105	1.75	acute	ssc	cortical sensory	pvlb	pvlb	4-5	4-5	increase	plt0.05	0.05	f-test	nr	nr	nr	eyeball-dCT-from-figure		15	2016	27649637	main	gapdh	nr	rt-qpcr	dCT-gene-to-control	dCT-gene-to-control	gapdh	doi	6.0	bs-saline	pvalb
Martin	3	rat	spraguedawley	nr	male	rtqpcr	dCTvControl	2.82843	doi	6	saline	105	1.75	acute	ssc	cortical sensory	slc17a6	slc17a6	4-5	4-5	increase	plt0.001	0.05	f-test	nr	nr	nr	eyeball-dCT-from-figure		16	2016	27649637	main	gapdh	nr	rt-qpcr	dCT-gene-to-control	dCT-gene-to-control	gapdh	doi	6.0	bs-saline	slc17a6
Martin	3	rat	spraguedawley	nr	male	rtqpcr	dCTvControl	3.4822	doi	6	saline	105	1.75	acute	mpfc	cortical prefrontal	slc6a1	slc6a1	4-5	4-5	increase	plt0.05	0.05	f-test	nr	nr	nr	eyeball-dCT-from-figure		10	2016	27649637	main	gapdh	nr	rt-qpcr	dCT-gene-to-control	dCT-gene-to-control	gapdh	doi	6.0	bs-saline	slc6a1
Martin	3	rat	spraguedawley	nr	male	rtqpcr	dCTvControl	17.1484	doi	6	saline	105	1.75	acute	ssc	cortical sensory	slc6a1	slc6a1	4-5	4-5	increase	plt0.001	0.05	f-test	nr	nr	nr	eyeball-dCT-from-figure		13	2016	27649637	main	gapdh	nr	rt-qpcr	dCT-gene-to-control	dCT-gene-to-control	gapdh	doi	6.0	bs-saline	slc6a1
Martin	3	rat	spraguedawley	nr	male	rtqpcr	dCTvControl	13.9288	doi	6	saline	105	1.75	acute	ssc	cortical sensory	sst	sst	4-5	4-5	increase	plt0.001	0.05	f-test	nr	nr	nr	eyeball-dCT-from-figure		14	2016	27649637	main	gapdh	nr	rt-qpcr	dCT-gene-to-control	dCT-gene-to-control	gapdh	doi	6.0	bs-saline	sst
Benekareddy	1	rat	spraguedawley	nr	male	ish	%control	175	doi	8	saline	120	2	acute	neocortex	cortical prefrontal	arc	arc	3-4	3-4	increase	0.009	0.05-tt	t-stat	nr	SEM	20	Effect size and variance result was eyeballed from figure2. No value was provided in text.		1	2012	22404904	fig.2	na	nr	In-situ-hybridization	mrna-percent-of-control	mrna-percent-of-control	na	doi	8.0	bs-vehicle	arc
Benekareddy	2	rat	spraguedawley	nr	male	ish	%control	150	doi	8	saline	120	2	acute	neocortex	cortical prefrontal	arc	arc	4-6	4-6	increase	plt-0.001	0.05-tt	F-stat	15.78	SEM	20	Effect size and variance result was eyeballed from figure5. No value was provided in text.		2	2012	22404904	fig.5	na	nr	In-situ-hybridization	mrna-percent-of-control	mrna-percent-of-control	na	doi	8.0	bs-vehicle	arc
Desouza	1	rat	spraguedawley	E17.5	male	rtqpcr	FC	2.25	doi	10uM	dmso	120	2	acute	cortical neurons	cortical prefrontal	arc	arc	4	4	increase	plt-0.05	0.05	F-stat	nr	SEM	0.05	effect size and variation was eyeballed from figure. Experiment was done in cell culture and concentration was reported in micromolar. Cortical neurons also extracted from rat embryo.		1	2021	35002622	fig.1	hprt	E17.5	qpcr	fold-change	FC-wr-control	hprt	doi	10uM	bs-dmso	arc
Desouza	1	rat	spraguedawley	E17.5	male	rtqpcr	FC	1.8	doi	10uM	dmso	120	2	acute	cortical neurons	cell culture	arc	arc	3–5	3–5	increase	plt-0.05	0.05	F-stat	nr	SEM	0.3	effect size and variation was eyeballed from figure. Experiment was done in cell culture and concentration was reported in micromolar. Cortical neurons also extracted from rat embryo.		7	2021	35002622	fig.1	hprt	E17.5	qpcr	fold-change	FC-wr-control	hprt	doi	10uM	bs-dmso	arc
Desouza	2	mouse	C57BL/6	18	nr	rtqpcr	FC	4.1	doi	2	saline	120	2	acute	neocortex	cortical prefrontal	arc	arc	12	12	increase	plt-0.05	0.05	F-stat	81.38	SEM	0.6	effect size and variation was eyeballed from figure.		1	2021	35002622	fig.2	hprt	4-5 months	qpcr	FC-wr-control	FC-wr-control	hprt	doi	2	bs-vehicle	arc
Desouza	4	rat	spraguedawley	10	male	rtqpcr	FC	2	doi	8	saline	120	2	acute	neocortex	cortical prefrontal	arc	arc	4–6	4–6	increase	plt-0.05	0.05-tt	ttest	nr	SEM	0.1	effect size and variation eyeballed from figure.		1	2021	35002622	fig.3	hprt	2-3 months	qpcr	FC-wr-control	FC-wr-control	hprt	doi	8.0	bs-vehicle	arc
Desouza	5	mouse	C57BL/6	18	nr	rtqpcr	%control	140	doi	8	saline	120	2	acute	somatosensory-cortex	cortical sensory	arc	arc	3-4	3-4	increase	plt-0.05	0.05-tt	F-test	16.81	SEM	10	effect size value and variation was eyeballed from figure.		1	2021	35002622	fig.4	hprt	4–5 months	qpcr	mRNA-percent-of-control	mRNA-percent-of-control	hprt	doi	8	bs-vehicle	arc
Desouza	5	mouse	C57BL/6	18	nr	rtqpcr	%control	190	doi	8	saline	120	2	acute	prefrontal-cortex	cortical prefrontal	arc	arc	3-4	3-4	increase	plt-0.05	0.05-tt	F-test	78.83	SEM	10	effect size value and variation was eyeballed from figure.		2	2021	35002622	fig.4	hprt	4–5 months	qpcr	mRNA-percent-of-control	mRNA-percent-of-control	hprt	doi	8	bs-vehicle	arc
Desouza	4	rat	spraguedawley	10	male	rtqpcr	FC	5.7	doi	8	saline	120	2	acute	neocortex	cortical prefrontal	atf3	atf3	4–6	4–6	increase	plt-0.05	0.05-tt	ttest	nr	SEM	0.1	effect size and variation eyeballed from figure.		2	2021	35002622	fig.3	hprt	2-3 months	qpcr	FC-wr-control	FC-wr-control	hprt	doi	8.0	bs-vehicle	atf3
Desouza	4	rat	spraguedawley	10	male	rtqpcr	FC	1.8	doi	8	saline	120	2	acute	neocortex	cortical prefrontal	atf4	atf4	4–6	4–6	increase	plt-0.05	0.05	ttest	nr	SEM	0.1	effect size and variation eyeballed from figure		3	2021	35002622	fig.3	hprt	2–3 months	qpcr	FC-wr-control	FC-wr-control	hprt	doi	8.0	bs-vehicle	atf4
Desouza	1	rat	spraguedawley	E17.5	male	rtqpcr	FC	2.25	doi	10uM	dmso	120	2	acute	cortical neurons	cell culture	bdnf1	bdnf1	4	4	increase	plt-0.05	0.05	F-stat	nr	SEM	0.05	effect size and variation was eyeballed from figure. Experiment was done in cell culture and concentration was reported in micromolar. Cortical neurons also extracted from rat embryo.		2	2021	35002622	fig.1	hprt	E17.5	qpcr	fold-change	FC-wr-control	hprt	doi	10uM	bs-dmso	bndf
Desouza	1	rat	spraguedawley	E17.5	male	rtqpcr	FC	1.9	doi	10uM	dmso	120	2	acute	cortical neurons	cell culture	bdnf1	bdnf1	3–5	3–5	increase	plt-0.05	0.05	F-stat	nr	SEM	0.25	effect size and variation was eyeballed from figure. Experiment was done in cell culture and concentration was reported in micromolar. Cortical neurons also extracted from rat embryo.		8	2021	35002622	fig.1	hprt	E17.5	qpcr	fold-change	FC-wr-control	hprt	doi	10uM	bs-dmso	bndf
Desouza	2	mouse	C57BL/6	18	nr	rtqpcr	FC	2	doi	2	saline	120	2	acute	neocortex	cortical prefrontal	bdnf1	bdnf1	12	12	increase	plt-0.05	0.05	F-stat	20.37	SEM	0.25	effect size and variation was eyeballed from figure.		2	2021	35002622	fig.2	hprt	4-5 months	qpcr	FC-wr-control	FC-wr-control	hprt	doi	2	bs-vehicle	bndf
Desouza	4	rat	spraguedawley	10	male	rtqpcr	FC	3	doi	8	saline	120	2	acute	neocortex	cortical prefrontal	bdnf1	bdnf1	4–6	4–6	increase	plt-0.05	0.05	ttest	nr	SEM	0.3	effect size and variation eyeballed from figure		4	2021	35002622	fig.3	hprt	2–3 months	qpcr	FC-wr-control	FC-wr-control	hprt	doi	8.0	bs-vehicle	bndf
Desouza	1	rat	spraguedawley	E17.5	male	rtqpcr	FC	1.55	doi	10uM	dmso	120	2	acute	cortical neurons	cell culture	cebpb	cebpb	4	4	increase	plt-0.05	0.05	F-stat	nr	SEM	0.2	effect size and variation was eyeballed from figure. Experiment was done in cell culture and concentration was reported in micromolar. Cortical neurons also extracted from rat embryo.		3	2021	35002622	fig.1	hprt	E17.5	qpcr	fold-change	FC-wr-control	hprt	doi	10uM	bs-dmso	cebpb
Desouza	1	rat	spraguedawley	E17.5	male	rtqpcr	FC	1.5	doi	10uM	dmso	120	2	acute	cortical neurons	cell culture	cebpb	cebpb	3–5	3–5	increase	plt-0.05	0.05	F-stat	nr	SEM	0.1	effect size and variation was eyeballed from figure. Experiment was done in cell culture and concentration was reported in micromolar. Cortical neurons also extracted from rat embryo.		9	2021	35002622	fig.1	hprt	E17.5	qpcr	fold-change	FC-wr-control	hprt	doi	10uM	bs-dmso	cebpb
Desouza	4	rat	spraguedawley	10	male	rtqpcr	FC	4.1	doi	8	saline	120	2	acute	neocortex	cortical prefrontal	cebpb	cebpb	4–6	4–6	increase	plt-0.05	0.05	ttest	nr	SEM	0.1	effect size and variation eyeballed from figure		5	2021	35002622	fig.3	hprt	2–3 months	qpcr	FC-wr-control	FC-wr-control	hprt	doi	8.0	bs-vehicle	cebpb
Desouza	6	mouse	C57BL/6	18	nr	rtqpcr	FC	3.8	doi	8	saline	120	2	acute	neocortex	cortical prefrontal	cebpb	cebpb	3-4	3-4	increase	plt-0.05	0.05-tt	F-test	3.388	SEM	0.5	effect size value and variation was eyeballed from figure.		3	2021	35002622	fig.4	hprt	4–5 months	qpcr	FC-wr-control	FC-wr-control	hprt	doi	8	bs-vehicle	cebpb
Desouza	4	rat	spraguedawley	10	male	rtqpcr	FC	4.0	doi	8	saline	120	2	acute	neocortex	cortical prefrontal	cebpd	cebpd	4–6	4–6	increase	plt-0.05	0.05	ttest	nr	SEM	0.1	effect size and variation eyeballed from figure		6	2021	35002622	fig.3	hprt	2–3 months	qpcr	FC-wr-control	FC-wr-control	hprt	doi	8.0	bs-vehicle	cebpd
Desouza	1	rat	spraguedawley	E17.5	male	rtqpcr	FC	2.5	doi	10uM	dmso	120	2	acute	cortical neurons	cell culture	c-Fos	cfos	4	4	increase	plt-0.05	0.05	F-stat	nr	SEM	0.05	effect size and variation was eyeballed from figure. Experiment was done in cell culture and concentration was reported in micromolar. Cortical neurons also extracted from rat embryo.		4	2021	35002622	fig.1	hprt	E17.5	qpcr	fold-change	FC-wr-control	hprt	doi	10uM	bs-dmso	fos
Desouza	1	rat	spraguedawley	E17.5	male	rtqpcr	FC	1.6	doi	10uM	dmso	120	2	acute	cortical neurons	cell culture	c-fos	cfos	3–5	3–5	increase	plt-0.05	0.05	F-stat	nr	SEM	0.35	effect size and variation was eyeballed from figure. Experiment was done in cell culture and concentration was reported in micromolar. Cortical neurons also extracted from rat embryo.		10	2021	35002622	fig.1	hprt	E17.5	qpcr	fold-change	FC-wr-control	hprt	doi	10uM	bs-dmso	fos
Desouza	3	mouse	C57BL/6	18	nr	rtqpcr	FC	2.2	doi	2	saline	120	2	acute	neocortex	cortical prefrontal	c-fos	cfos	12	12	increase	plt-0.05	0.05	F-stat	26.72	SEM	0.25	effect size and variation eyeballed from figure.		3	2021	35002622	fig.2	hprt	4-5 months	qpcr	FC-wr-control	FC-wr-control	hprt	doi	2	bs-vehicle	fos
Desouza	4	rat	spraguedawley	10	male	rtqpcr	FC	3.8	doi	8	saline	120	2	acute	neocortex	cortical prefrontal	c-fos	cfos	4–6	4–6	increase	plt-0.05	0.05	ttest	nr	SEM	0.1	effect size and variation eyeballed from figure		11	2021	35002622	fig.3	hprt	2–3 months	qpcr	FC-wr-control	FC-wr-control	hprt	doi	8.0	bs-vehicle	fos
Desouza	6	mouse	C57BL/6	18	nr	rtqpcr	FC	4.5	doi	8	saline	120	2	acute	neocortex	cortical prefrontal	c-fos	cfos	3-4	3-4	increase	plt-0.05	0.05-tt	F-test	4.493	SEM	0.5	effect size value and variation was eyeballed from figure.		4	2021	35002622	fig.4	hprt	4–5 months	qpcr	FC-wr-control	FC-wr-control	hprt	doi	8	bs-vehicle	fos
Desouza	1	rat	spraguedawley	E17.5	male	rtqpcr	FC	1.9	doi	10uM	dmso	120	2	acute	cortical neurons	cell culture	egr1	egr1	4	4	increase	plt-0.05	0.05	F-stat	nr	SEM	0.1	effect size and variation was eyeballed from figure. Experiment was done in cell culture and concentration was reported in micromolar. Cortical neurons also extracted from rat embryo.		5	2021	35002622	fig.1	hprt	E17.5	qpcr	fold-change	FC-wr-control	hprt	doi	10uM	bs-dmso	egr1
Desouza	1	rat	spraguedawley	E17.5	male	rtqpcr	FC	1.3	doi	10uM	dmso	120	2	acute	cortical neurons	cell culture	egr1	egr1	3–5	3–5	increase	plt-0.05	0.05	F-stat	nr	SEM	0.15	effect size and variation was eyeballed from figure. Experiment was done in cell culture and concentration was reported in micromolar. Cortical neurons also extracted from rat embryo.		11	2021	35002622	fig.1	hprt	E17.5	qpcr	fold-change	FC-wr-control	hprt	doi	10uM	bs-dmso	egr1
Desouza	3	mouse	C57BL/6	18	nr	rtqpcr	FC	2.2	doi	2	saline	120	2	acute	neocortex	cortical prefrontal	egr-1	egr1	12	12	increase	pli-0.05	0.05	F-stat	34.58	SEM	0.3	effect size and variation eyeballed from figure.		4	2021	35002622	fig.2	hprt	4-5 months	qpcr	FC-wr-control	FC-wr-control	hprt	doi	2	bs-vehicle	egr1
Desouza	4	rat	spraguedawley	10	male	rtqpcr	FC	2.1	doi	8	saline	120	2	acute	neocortex	cortical prefrontal	egr-1	egr1	4–6	4–6	increase	plt-0.05	0.05	ttest	nr	SEM	0.05	effect size and variation eyeballed from figure		7	2021	35002622	fig.3	hprt	2–3 months	qpcr	FC-wr-control	FC-wr-control	hprt	doi	8.0	bs-vehicle	egr1
Desouza	1	rat	spraguedawley	E17.5	male	rtqpcr	FC	2.4	doi	10uM	dmso	120	2	acute	cortical neurons	cell culture	egr2	egr2	4	4	increase	plt-0.05	0.05	F-stat	nr	SEM	0.15	effect size and variation was eyeballed from figure. Experiment was done in cell culture and concentration was reported in micromolar. Cortical neurons also extracted from rat embryo.		6	2021	35002622	fig.1	hprt	E17.5	qpcr	fold-change	FC-wr-control	hprt	doi	10uM	bs-dmso	egr2
Desouza	3	mouse	C57BL/6	18	nr	rtqpcr	FC	2.8	doi	2	saline	120	2	acute	neocortex	cortical prefrontal	egr-2	egr2	12	12	increase	pli-0.05	0.05	F-stat	1392	SEM	0.35	effect size and variation eyeballed from figure.		5	2021	35002622	fig.2	hprt	4-5 months	qpcr	FC-wr-control	FC-wr-control	hprt	doi	2	bs-vehicle	egr2
Desouza	4	rat	spraguedawley	10	male	rtqpcr	FC	5.2	doi	8	saline	120	2	acute	neocortex	cortical prefrontal	egr-2	egr2	4–6	4–6	increase	plt-0.05	0.05	ttest	nr	SEM	0.05	effect size and variation eyeballed from figure		8	2021	35002622	fig.3	hprt	2–3 months	qpcr	FC-wr-control	FC-wr-control	hprt	doi	8.0	bs-vehicle	egr2
Desouza	4	rat	spraguedawley	10	male	rtqpcr	FC	2.0	doi	8	saline	120	2	acute	neocortex	cortical prefrontal	egr-3	egr3	4–6	4–6	increase	plt-0.05	0.05	ttest	nr	SEM	0.05	effect size and variation eyeballed from figure		9	2021	35002622	fig.3	hprt	2–3 months	qpcr	FC-wr-control	FC-wr-control	hprt	doi	8.0	bs-vehicle	egr3
Desouza	4	rat	spraguedawley	10	male	rtqpcr	FC	2.3	doi	8	saline	120	2	acute	neocortex	cortical prefrontal	egr-4	egr4	4–6	4–6	increase	plt-0.05	0.05	ttest	nr	SEM	0.1	effect size and variation eyeballed from figure		10	2021	35002622	fig.3	hprt	2–3 months	qpcr	FC-wr-control	FC-wr-control	hprt	doi	8.0	bs-vehicle	egr4
Desouza	4	rat	spraguedawley	10	male	rtqpcr	FC	2.1	doi	8	saline	120	2	acute	neocortex	cortical prefrontal	junb	junb	4–6	4–6	increase	plt-0.05	0.05	ttest	nr	SEM	0.2	effect size and variation eyeballed from figure		12	2021	35002622	fig.3	hprt	2–3 months	qpcr	FC-wr-control	FC-wr-control	hprt	doi	8.0	bs-vehicle	junb
Desouza	4	rat	spraguedawley	10	male	rtqpcr	FC	3.1	doi	8	saline	120	2	acute	neocortex	cortical prefrontal	nfkbia	nfkbia	4–6	4–6	increase	plt-0.05	0.05	ttest	nr	SEM	0.2	effect size and variation eyeballed from figure		13	2021	35002622	fig.3	hprt	2–3 months	qpcr	FC-wr-control	FC-wr-control	hprt	doi	8.0	bs-vehicle	nfkbia
Gewirtz	1	rat	spraguedawley	nr	male	ish	%control	159	doi	5	saline	120	2	acute	mpfc	cortical prefrontal	bdnf	bdnf	4	4	increase	plt-0.01	0.05-tt	F-test	17.4	nr	10	variance was not stated in paper. However the graph had error bars. variance value was eyeballed	X	1	2002	12117585	fig.2	na	nr	in-situ-hybridization	mrna-percent-of-control	mrna-percent-of-control	na	doi	5.0	bs-vehicle	bdnf
Gewirtz	1	rat	spraguedawley	nr	male	ish	%control	153	doi	5	saline	120	2	acute	frontoparietal-cortex	cortical parietal	bdnf	bdnf	4	4	increase	plt-0.05	0.05-tt	F-test	7.4	nr	23	paper did not state what the value of the variation was (SD ro SEM)	X	2	2002	12117585	Results 3.1	na	nr	in-situ-hybridization	mrna-percent-of-control	mrna-percent-of-control	na	doi	5.0	bs-vehicle	bdnf
Gewirtz	1	rat	spraguedawley	nr	male	ish	%control	130	doi	5	saline	120	2	acute	claustrum	subcortical	bdnf	bdnf	4	4	increase	plt-0.05	0.05-tt	F-test	13.4	nr	16	paper did not state what the value of the variation was (SD ro SEM)	X	3	2002	12117585	Results3.1	na	nr	in-situ-hybridization	mrna-percent-of-control	mrna-percent-of-control	na	doi	5.0	bs-vehicle	bdnf
Gewirtz	2	rat	spraguedawley	nr	male	ish	%control	154	doi	5	saline	120	2	acute	mPFC	cortical prefrontal	bdnf	bdnf	3	3	increase	0.001	0.05-tt	F-test	12.8	nr	10	paper did not state what the value of the variation was (SD ro SEM). Paper did not state what value of effect size was, and was eyeballed from graph	X	4	2002	12117585	figure4	na	nr	in-situ-hybridization	mrna-percent-of-control	mrna-percent-of-control	na	doi	5.0	bs-vehicle	bdnf
Gewirtz	3	rat	spraguedawley	nr	male	ish	%control	182	doi	5	saline	120	2	acute	mPFC	cortical prefrontal	bdnf	bdnf	9	8	increase	plt-0.01	0.05-tt	F-test	57.3	nr	15	paper did not state what the value of the variation was (SD ro SEM). Paper did not state what value of effect size was, and was eyeballed from graph	X	5	2002	12117585	figure6	na	nr	in-situ-hybridization	mrna-percent-of-control	mrna-percent-of-control	na	doi	5.0	bs-vehicle	bdnf
Vaidya	2	rat	spraguedawley	nr	male	ish	%control	55	doi	0.5	saline	120	2	acute	dentate-gyrus	subcortical	bdnf	bdnf	4	3	decrease	plt0.05	0.05	q-test	nr	SEM	nr	EffectSizeValue estimated from figure		3	1997	9092600	main	multiple	nr	in-situ-hybridization	%-of-vehicle	mean	none	doi	0.5	bs-vehicle	bdnf
Vaidya	2	rat	spraguedawley	nr	male	ish	%control	52	doi	2	saline	120	2	acute	dentate-gyrus	subcortical	bdnf	bdnf	4	3	decrease	plt0.05	0.05	q-test	nr	SEM	nr	EffectSizeValue estimated from figure		4	1997	9092600	main	multiple	nr	in-situ-hybridization	%-of-vehicle	mean	none	doi	2.0	bs-vehicle	bdnf
Vaidya	2	rat	spraguedawley	nr	male	ish	%control	145	doi	0.5	saline	120	2	acute	parietal-cortex	cortical parietal	bdnf	bdnf	4	3	increase	plt0.05	0.05	q-test	nr	SEM	nr	EffectSizeValue estimated from figure		5	1997	9092600	main	multiple	nr	in-situ-hybridization	%-of-vehicle	mean	none	doi	0.5	bs-vehicle	bdnf
Vaidya	2	rat	spraguedawley	nr	male	ish	%control	170	doi	2	saline	120	2	acute	parietal-cortex	cortical parietal	bdnf	bdnf	4	3	increase	plt0.05	0.05	q-test	nr	SEM	nr	EffectSizeValue estimated from figure		6	1997	9092600	main	multiple	nr	in-situ-hybridization	%-of-vehicle	mean	none	doi	2.0	bs-vehicle	bdnf
Vaidya	3	rat	spraguedawley	nr	male	ish	%control	210	doi	2	saline	120	2	acute	parietal-cortex	cortical parietal	bdnf	bdnf	3	3	increase	plt0.05	0.05	q-test	nr	SEM	nr	EffectSizeValue estimated from figure		8	1997	9092600	main	multiple	nr	in-situ-hybridization	%-of-vehicle	mean	none	doi	2.0	bs-vehicle	bdnf
Vaidya	3	rat	spraguedawley	nr	male	ish	%control	55	doi	2	saline	120	2	acute	dentate-gyrus	subcortical	bdnf	bdnf	3	3	decrease	plt0.05	0.05	q-test	nr	SEM	nr	EffectSizeValue estimated from figure		10	1997	9092600	main	multiple	nr	in-situ-hybridization	%-of-vehicle	mean	none	doi	2.0	bs-vehicle	bdnf
Fadahunsi	1	mouse	C57BL/6J	10	male	rnaseq	logFC	-0.6	psil	3	saline	180	3	acute	PFC	cortical prefrontal	apoo	apoo	8	8	decrease	10^-5.6	0.05-tt	t-test	nr	nr	nr	P value, effect size value were eyeballed from fig 4C	X	5	2022	35953488	fig.4	nr	10 weeks	rna-seq	log(FC)	log(FC)	nr	psil	3	bs-vehicle	apoo
Fadahunsi	1	mouse	C57BL/6J	10	male	rnaseq	logFC	nr	psil	3	saline	180	3	acute	PFC	cortical prefrontal	bdnf	bdnf	8	8	nr	padjlt-0.05	0.05-tt	t-test	nr	nr	nr	figure only stated p value for these genes lt 0.05. No FC info or increase/decrease.	X	12	2022	35953488	fig.4	nr	10 weeks	rna-seq	log(FC)	log(FC)	nr	psil	3	bs-vehicle	bdnf
Fadahunsi	1	mouse	C57BL/6J	10	male	rnaseq	logFC	-0.75	psil	3	saline	180	3	acute	PFC	cortical prefrontal	cdh19	cdh19	8	8	decrease	10^-5.7	0.05-tt	t-test	nr	nr	nr	P value, effect size value were eyeballed from fig 4C	X	4	2022	35953488	fig.4	nr	10 weeks	rna-seq	log(FC)	log(FC)	nr	psil	3	bs-vehicle	cdh19
Fadahunsi	1	mouse	C57BL/6J	10	male	rnaseq	logFC	0.7	psil	3	saline	180	3	acute	PFC	cortical prefrontal	col5a1	col5a1	8	8	increase	10^-5.7	0.05-tt	t-test	nr	nr	nr	P value, effect size value were eyeballed from fig 4C	X	8	2022	35953488	fig.4	nr	10 weeks	rna-seq	log(FC)	log(FC)	nr	psil	3	bs-vehicle	col5a1
Fadahunsi	1	mouse	C57BL/6J	10	male	rnaseq	logFC	-0.5	psil	3	saline	180	3	acute	PFC	cortical prefrontal	coq10b	coq10b	8	8	decrease	10^-6.5	0.05-tt	t-test	nr	nr	nr	P value, effect size value were eyeballed from fig 4C	X	2	2022	35953488	fig.4	nr	10 weeks	rna-seq	log(FC)	log(FC)	nr	psil	3	bs-vehicle	coq10b
Fadahunsi	1	mouse	C57BL/6J	10	male	rnaseq	logFC	0.3	psil	3	saline	180	3	acute	PFC	cortical prefrontal	cyb561a3	cyb561a3	8	8	increase	10^-6.2	0.05-tt	t-test	nr	nr	nr	P value, effect size value were eyeballed from fig 4C	X	7	2022	35953488	fig.4	nr	10 weeks	rna-seq	log(FC)	log(FC)	nr	psil	3	bs-vehicle	cyb561a3
Fadahunsi	1	mouse	C57BL/6J	10	male	rnaseq	logFC	-0.8	psil	3	saline	180	3	acute	PFC	cortical prefrontal	dio2	dio2	8	8	decrease	10^-5.6	0.05-tt	t-test	nr	nr	nr	P value, effect size value were eyeballed from fig 4C	X	6	2022	35953488	fig.4	nr	10 weeks	rna-seq	log(FC)	log(FC)	nr	psil	3	bs-vehicle	dio2
Fadahunsi	1	mouse	C57BL/6J	10	male	rnaseq	logFC	0.4	psil	3	saline	180	3	acute	PFC	cortical prefrontal	hrh1	hrh1	8	8	increase	10^-5.5	0.05-tt	t-test	nr	nr	nr	P value, effect size value were eyeballed from fig 4C	X	10	2022	35953488	fig.4	nr	10 weeks	rna-seq	log(FC)	log(FC)	nr	psil	3	bs-vehicle	hrh1
Fadahunsi	1	mouse	C57BL/6J	10	male	rnaseq	logFC	-0.6	psil	3	saline	180	3	acute	PFC	cortical prefrontal	lrrtm4	lrrtm4	8	8	decrease	10^-6.2	0.05-tt	t-test	nr	nr	nr	P value, effect size value were eyeballed from fig 4C	X	3	2022	35953488	fig.4	nr	10 weeks	rna-seq	log(FC)	log(FC)	nr	psil	3	bs-vehicle	lrrtm4
Fadahunsi	1	mouse	C57BL/6J	10	male	rnaseq	logFC	nr	psil	3	saline	180	3	acute	PFC	cortical prefrontal	negr1	negr1	8	8	nr	padjlt-0.05	0.05-tt	t-test	nr	nr	nr	figure only stated p value for these genes lt 0.05. No FC info or increase/decrease.	X	13	2022	35953488	fig.4	nr	10 weeks	rna-seq	log(FC)	log(FC)	nr	psil	3	bs-vehicle	negr1
Fadahunsi	1	mouse	C57BL/6J	10	male	rnaseq	logFC	0.25	psil	3	saline	180	3	acute	PFC	cortical prefrontal	nelfb	nelfb	8	8	increase	10^-5.6	0.05-tt	t-test	nr	nr	nr	P value, effect size value were eyeballed from fig 4C	X	9	2022	35953488	fig.4	nr	10 weeks	rna-seq	log(FC)	log(FC)	nr	psil	3	bs-vehicle	nelfb
Fadahunsi	1	mouse	C57BL/6J	10	male	rnaseq	logFC	nr	psil	3	saline	180	3	acute	PFC	cortical prefrontal	nptn	nptn	8	8	nr	padjlt-0.05	0.05-tt	t-test	nr	nr	nr	figure only stated p value for these genes lt 0.05. No FC info or increase/decrease.	X	11	2022	35953488	fig.4	nr	10 weeks	rna-seq	log(FC)	log(FC)	nr	psil	3	bs-vehicle	nptn
Fadahunsi	1	mouse	C57BL/6J	10	male	rnaseq	logFC	-0.5	psil	3	saline	180	3	acute	PFC	cortical prefrontal	usp53	usp53	8	8	decrease	10^-7	0.05-tt	t-test	nr	nr	nr	P value, effect size value were eyeballed from fig 4C	X	1	2022	35953488	fig.4	nr	10 weeks	rna-seq	log(FC)	log(FC)	nr	psil	3	bs-vehicle	usp53
Vaidya	1	rat	spraguedawley	nr	male	ish	%control	48	doi	8	saline	180	3	acute	dentate-gyrus	subcortical	bdnf	bdnf	6	6	decrease	plt0.05	0.05	t-test	nr	SEM	nr	EffectSizeValue estimated from figure		1	1997	9092600	main	multiple	nr	in-situ-hybridization	%-of-vehicle	mean	none	doi	8.0	bs-vehicle	bdnf
Vaidya	1	rat	spraguedawley	nr	male	ish	%control	180	doi	8	saline	180	3	acute	parietal-cortex	cortical parietal	bdnf	bdnf	6	6	increase	plt0.05	0.05	t-test	nr	SEM	nr	EffectSizeValue estimated from figure		2	1997	9092600	main	multiple	nr	in-situ-hybridization	%-of-vehicle	mean	none	doi	8.0	bs-vehicle	bdnf
Vaidya	3	rat	spraguedawley	nr	male	ish	%control	190	doi	2	saline	180	3	acute	parietal-cortex	cortical parietal	bdnf	bdnf	4	4	increase	plt0.05	0.05	q-test	nr	SEM	nr	EffectSizeValue estimated from figure		9	1997	9092600	main	multiple	nr	in-situ-hybridization	%-of-vehicle	mean	none	doi	2.0	bs-vehicle	bdnf
Vaidya	3	rat	spraguedawley	nr	male	ish	%control	35	doi	2	saline	180	3	acute	dentate-gyrus	subcortical	bdnf	bdnf	4	4	decrease	plt0.05	0.05	q-test	nr	SEM	nr	EffectSizeValue estimated from figure		11	1997	9092600	main	multiple	nr	in-situ-hybridization	%-of-vehicle	mean	none	doi	2.0	bs-vehicle	bdnf
Nichols	5	rat	sprague-dawley	nr	male	rnasepro	%control	149	lsd	1.0	saline	300	5	acute	prefrontal-cortex	cortical prefrontal	Nor1	nor1	4	3	increase	plt0.05	0.05	t-test	nr	SEM	11	tx=3 independent rats.		24	2003	12654518	main	cyclophilin	nr	rnase-protection-assay	percent-expressed-compared-to-baseline		cyclophilin	lsd	1.0	bs-vehicle	nr4a3
Donovan	1	pig	YorkshirexDurocxLandrace	9-weeks	female	RNAseq	Log2(FC)	-1.105	psil	0.08	saline	1440	24	subacute	PFC	cortical prefrontal	A2M	a2m	6	6	decrease	0.0005	0.05	permutation-test	nr	nr	nr	FDR=0.0489. Full length analysis		3	2021	33288378	TableS.2	na	9-weeks	RNAseq	Log2(FC)		na	psilocybin	0.08	bs-vehicle	A2M
Donovan	1	pig	YorkshirexDurocxLandrace	9-weeks	female	RNAseq	Log2(FC)	1.2011	psil	0.08	saline	1440	24	subacute	PFC	cortical prefrontal	AVP	avp	6	6	increase	0.0002	0.05	permutation-test	nr	nr	nr	FDR=0.0163. 3' tag analysis.		12	2021	33288378	TableS.2	na	9-weeks	RNAseq	Log2(FC)		na	psilocybin	0.08	bs-vehicle	AVP
Donovan	1	pig	YorkshirexDurocxLandrace	9-weeks	female	RNAseq	Log2(FC)	-1.576	psil	0.08	saline	1440	24	subacute	PFC	cortical prefrontal	C12orf75	c12orf75	6	6	decrease	0.0002	0.05	permutation-test	nr	nr	nr	FDR=0.0387. Full length analysis		1	2021	33288378	TableS.2	na	9-weeks	RNAseq	Log2(FC)		na	psilocybin	0.08	bs-vehicle	C12orf75
Donovan	1	pig	YorkshirexDurocxLandrace	9-weeks	female	RNAseq	Log2(FC)	1.0269	psil	0.08	saline	1440	24	subacute	PFC	cortical prefrontal	CDKN1A	cdkn1a	6	6	increase	0.0025	0.05	permutation-test	nr	nr	nr	FDR=0.0497. 3' tag analysis.		16	2021	33288378	TableS.2	na	9-weeks	RNAseq	Log2(FC)		na	psilocybin	0.08	bs-vehicle	CDKN1A
Donovan	1	pig	YorkshirexDurocxLandrace	9-weeks	female	RNAseq	Log2(FC)	1.2984	psil	0.08	saline	1440	24	subacute	PFC	cortical prefrontal	DMGDH	dmgdh	6	6	increase	0.0018	0.05	permutation-test	nr	nr	nr	FDR=0.0408. 3' tag analysis.		11	2021	33288378	TableS.2	na	9-weeks	RNAseq	Log2(FC)		na	psilocybin	0.08	bs-vehicle	DMGDH
Donovan	1	pig	YorkshirexDurocxLandrace	9-weeks	female	RNAseq	Log2(FC)	-1.023	psil	0.08	saline	1440	24	subacute	PFC	cortical prefrontal	DMRT2	dmrt2	6	6	decrease	0.0004	0.05	permutation-test	nr	nr	nr	FDR=0.0474. Full length analysis		4	2021	33288378	TableS.2	na	9-weeks	RNAseq	Log2(FC)		na	psilocybin	0.08	bs-vehicle	DMRT2
Donovan	1	pig	YorkshirexDurocxLandrace	9-weeks	female	RNAseq	Log2(FC)	1.194	psil	0.08	saline	1440	24	subacute	PFC	cortical prefrontal	FGF22	fgf22	6	6	increase	3E-05	0.05	permutation-test	nr	nr	nr	FDR=0.0068. 3' tag analysis.		14	2021	33288378	TableS.2	na	9-weeks	RNAseq	Log2(FC)		na	psilocybin	0.08	bs-vehicle	FGF22
Donovan	1	pig	YorkshirexDurocxLandrace	9-weeks	female	RNAseq	Log2(FC)	-1.188	psil	0.08	saline	1440	24	subacute	PFC	cortical prefrontal	FZD10	fzd10	6	6	decrease	0.001	0.05	permutation-test	nr	nr	nr	FDR=0.0317. 3' tag analysis.		7	2021	33288378	TableS.2	na	9-weeks	RNAseq	Log2(FC)		na	psilocybin	0.08	bs-vehicle	FZD10
Donovan	1	pig	YorkshirexDurocxLandrace	9-weeks	female	RNAseq	Log2(FC)	-1.027	psil	0.08	saline	1440	24	subacute	PFC	cortical prefrontal	GALP	galp	6	6	decrease	0.0014	0.05	permutation-test	nr	nr	nr	FDR=0.0364. 3' tag analysis.		9	2021	33288378	TableS.2	na	9-weeks	RNAseq	Log2(FC)		na	psilocybin	0.08	bs-vehicle	GALP
Donovan	1	pig	YorkshirexDurocxLandrace	9-weeks	female	RNAseq	Log2(FC)	1.0143	psil	0.08	saline	1440	24	subacute	PFC	cortical prefrontal	HIST1H1D	hist1h1d	6	6	increase	0.0007	0.05	permutation-test	nr	nr	nr	FDR=0.0275. 3' tag analysis.		17	2021	33288378	TableS.2	na	9-weeks	RNAseq	Log2(FC)		na	psilocybin	0.08	bs-vehicle	HIST1H1D
Donovan	1	pig	YorkshirexDurocxLandrace	9-weeks	female	RNAseq	Log2(FC)	-1.463	psil	0.08	saline	1440	24	subacute	PFC	cortical prefrontal	ITIH5	itih5	6	6	decrease	0.0009	0.05	permutation-test	nr	nr	nr	FDR=0.0295. 3' tag analysis.		5	2021	33288378	TableS.2	na	9-weeks	RNAseq	Log2(FC)		na	psilocybin	0.08	bs-vehicle	ITIH5
Donovan	1	pig	YorkshirexDurocxLandrace	9-weeks	female	RNAseq	Log2(FC)	1.1995	psil	0.08	saline	1440	24	subacute	PFC	cortical prefrontal	LPAR5	lpar5	6	6	increase	0.0004	0.05	permutation-test	nr	nr	nr	FDR=0.0226. 3' tag analysis.		13	2021	33288378	TableS.2	na	9-weeks	RNAseq	Log2(FC)		na	psilocybin	0.08	bs-vehicle	LPAR5
Donovan	1	pig	YorkshirexDurocxLandrace	9-weeks	female	RNAseq	Log2(FC)	-1.297	psil	0.08	saline	1440	24	subacute	PFC	cortical prefrontal	MYH11	myh11	6	6	decrease	4E-06	0.05	permutation-test	nr	nr	nr	FDR=0.0092. Full length analysis		2	2021	33288378	TableS.2	na	9-weeks	RNAseq	Log2(FC)		na	psilocybin	0.08	bs-vehicle	MYH11
Donovan	1	pig	YorkshirexDurocxLandrace	9-weeks	female	RNAseq	Log2(FC)	-1.324	psil	0.08	saline	1440	24	subacute	PFC	cortical prefrontal	PRSS35	prss35	6	6	decrease	0.0005	0.05	permutation-test	nr	nr	nr	FDR=0.023. 3' tag analysis.		6	2021	33288378	TableS.2	na	9-weeks	RNAseq	Log2(FC)		na	psilocybin	0.08	bs-vehicle	PRSS35
Donovan	1	pig	YorkshirexDurocxLandrace	9-weeks	female	RNAseq	Log2(FC)	1.4818	psil	0.08	saline	1440	24	subacute	PFC	cortical prefrontal	SIAH3	siah3	6	6	increase	2E-06	0.05	permutation-test	nr	nr	nr	FDR=0.0032. 3' tag analysis.		10	2021	33288378	TableS.2	na	9-weeks	RNAseq	Log2(FC)		na	psilocybin	0.08	bs-vehicle	SIAH3
Donovan	1	pig	YorkshirexDurocxLandrace	9-weeks	female	RNAseq	Log2(FC)	1.1309	psil	0.08	saline	1440	24	subacute	PFC	cortical prefrontal	SLC26A1	slc26a1	6	6	increase	2E-05	0.05	permutation-test	nr	nr	nr	FDR=0.0067. 3' tag analysis.		15	2021	33288378	TableS.2	na	9-weeks	RNAseq	Log2(FC)		na	psilocybin	0.08	bs-vehicle	SLC26A1
Donovan	1	pig	YorkshirexDurocxLandrace	9-weeks	female	RNAseq	Log2(FC)	-1.031	psil	0.08	saline	1440	24	subacute	PFC	cortical prefrontal	SLC26A2	slc26a2	6	6	decrease	0.0017	0.05	permutation-test	nr	nr	nr	FDR=0.0404. 3' tag analysis.		8	2021	33288378	TableS.2	na	9-weeks	RNAseq	Log2(FC)		na	psilocybin	0.08	bs-vehicle	SLC26A2
Nardou	1	mouse	C57BL/6J	P98-to-P112	male	RNAseq	TPMratio	nr	lsd	0.001	saline	2880	48	subacute	NAc	subcortical	9630041A04Rik	9630041a04rik	3	3	increase	qlt-0.1	0.1	Benjamini–Hochberg-corrected-q	nr	nr	nr	Effect size from heat map was not estimated. Statistical test was done in comparison to closed period treatments. Increase and decrease was eyeballed in comparison to saline groups		9	2023	37316665	fig. 5	na	P98-to-P112	RNAseq	TPM-ratio-to-row-mean		nr	LSD	0.001	bs-vehicle	9630041A04Rik
Nardou	1	mouse	C57BL/6J	P98-to-P112	male	RNAseq	TPMratio	nr	lsd	0.001	saline	2880	48	subacute	NAc	subcortical	ac131185.2	ac131185.2	3	3	decrease	qlt-0.1	0.1	Benjamini–Hochberg-corrected-q	nr	nr	nr	Effect size from heat map was not estimated. Statistical test was done in comparison to closed period treatments. Increase and decrease was eyeballed in comparison to saline groups		10	2023	37316665	fig. 5	na	P98-to-P112	RNAseq	TPM-ratio-to-row-mean		nr	LSD	0.001	bs-vehicle	ac131185.2
Nardou	1	mouse	C57BL/6J	P98-to-P112	male	RNAseq	TPMratio	nr	lsd	0.001	saline	2880	48	subacute	NAc	subcortical	acrvl	acrvl	3	3	increase	qlt-0.1	0.1	Benjamini–Hochberg-corrected-q	nr	nr	nr	Effect size from heat map was not estimated. Statistical test was done in comparison to closed period treatments. Increase and decrease was eyeballed in comparison to saline groups		11	2023	37316665	fig. 5	na	P98-to-P112	RNAseq	TPM-ratio-to-row-mean		nr	LSD	0.001	bs-vehicle	acvrl1
Nardou	1	mouse	C57BL/6J	P98-to-P112	male	RNAseq	TPMratio	nr	lsd	0.001	saline	2880	48	subacute	NAc	subcortical	acrvl-1	acrvl1	3	3	increase	qlt-0.1	0.1	Benjamini–Hochberg-corrected-q	nr	nr	nr	Effect size from heat map was not estimated. Statistical test was done in comparison to closed period treatments. Increase and decrease was eyeballed in comparison to saline groups		12	2023	37316665	fig. 5	na	P98-to-P112	RNAseq	TPM-ratio-to-row-mean		nr	LSD	0.001	bs-vehicle	acvrl1
Nardou	1	mouse	C57BL/6J	P98-to-P112	male	RNAseq	TPMratio	nr	lsd	0.001	saline	2880	48	subacute	NAc	subcortical	adcy4	adcy4	3	3	increase	qlt-0.1	0.1	Benjamini–Hochberg-corrected-q	nr	nr	nr	Effect size from heat map was not estimated. Statistical test was done in comparison to closed period treatments. Increase and decrease was eyeballed in comparison to saline groups		13	2023	37316665	fig. 5	na	P98-to-P112	RNAseq	TPM-ratio-to-row-mean		nr	LSD	0.001	bs-vehicle	adcy4
Nardou	1	mouse	C57BL/6J	P98-to-P112	male	RNAseq	TPMratio	0.4	lsd	0.001	saline	2880	48	subacute	NAc	subcortical	adgre5	adgre5	3	3	increase	qlt-0.1	0.1	Benjamini–Hochberg-corrected-q	nr	nr	0.001	Effect size and variation eyeballed from graph. statistics reported as Benjamini–Hochberg-corrected-q		6	2023	37316665	fig. 5	na	P98-to-P112	RNAseq	TPM-ratio-to-saline-mean		nr	LSD	0.001	bs-vehicle	adgre5
Nardou	1	mouse	C57BL/6J	P98-to-P112	male	RNAseq	TPMratio	nr	lsd	0.001	saline	2880	48	subacute	NAc	subcortical	adgrl4	adgrl4	3	3	increase	qlt-0.1	0.1	Benjamini–Hochberg-corrected-q	nr	nr	nr	Effect size from heat map was not estimated. Statistical test was done in comparison to closed period treatments. Increase and decrease was eyeballed in comparison to saline groups		7	2023	37316665	fig. 5	na	P98-to-P112	RNAseq	TPM-ratio-to-row-mean		nr	LSD	0.001	bs-vehicle	adgrl4
Nardou	2	mouse	C57BL/6J	P98-to-P112	male	RNAseq	TPMratio	0.45	lsd	0.001	saline	2880	48	subacute	NAc	subcortical	akap12	akap12	3	3	increase	qlt-0.15	0.15	Benjamini–Hochberg-corrected-q	nr	nr	0.1	Effect size and variation eyeballed from graph. statistics reported as Benjamini–Hochberg-corrected-q		13	2023	37316665	Extended-figure10	na	P98-to-P112	RNAseq	TPM-ratio-to-saline-mean		nr	LSD	0.001	bs-vehicle	akap12
Nardou	1	mouse	C57BL/6J	P98-to-P112	male	RNAseq	TPMratio	nr	lsd	0.001	saline	2880	48	subacute	NAc	subcortical	angptl2	angptl2	3	3	increase	qlt-0.1	0.1	Benjamini–Hochberg-corrected-q	nr	nr	nr	Effect size from heat map was not estimated. Statistical test was done in comparison to closed period treatments. Increase and decrease was eyeballed in comparison to saline groups		14	2023	37316665	fig. 5	na	P98-to-P112	RNAseq	TPM-ratio-to-row-mean		nr	LSD	0.001	bs-vehicle	angptl2
Nardou	1	mouse	C57BL/6J	P98-to-P112	male	RNAseq	TPMratio	nr	lsd	0.001	saline	2880	48	subacute	NAc	subcortical	arc	arc	3	3	decrease	qlt-0.1	0.1	Benjamini–Hochberg-corrected-q	nr	nr	nr	Effect size from heat map was not estimated. Statistical test was done in comparison to closed period treatments. Increase and decrease was eyeballed in comparison to saline groups		15	2023	37316665	fig. 5	na	P98-to-P112	RNAseq	TPM-ratio-to-row-mean		nr	LSD	0.001	bs-vehicle	arc
Nardou	1	mouse	C57BL/6J	P98-to-P112	male	RNAseq	TPMratio	nr	lsd	0.001	saline	2880	48	subacute	NAc	subcortical	arl4d	arl4d	3	3	decrease	qlt-0.1	0.1	Benjamini–Hochberg-corrected-q	nr	nr	nr	Effect size from heat map was not estimated. Statistical test was done in comparison to closed period treatments. Increase and decrease was eyeballed in comparison to saline groups		16	2023	37316665	fig. 5	na	P98-to-P112	RNAseq	TPM-ratio-to-row-mean		nr	LSD	0.001	bs-vehicle	arl4d
Nardou	1	mouse	C57BL/6J	P98-to-P112	male	RNAseq	TPMratio	nr	lsd	0.001	saline	2880	48	subacute	NAc	subcortical	btg2	btg2	3	3	decrease	qlt-0.1	0.1	Benjamini–Hochberg-corrected-q	nr	nr	nr	Effect size from heat map was not estimated. Statistical test was done in comparison to closed period treatments. Increase and decrease was eyeballed in comparison to saline groups		17	2023	37316665	fig. 5	na	P98-to-P112	RNAseq	TPM-ratio-to-row-mean		nr	LSD	0.001	bs-vehicle	btg2
Nardou	2	mouse	C57BL/6J	P98-to-P112	male	RNAseq	TPMratio	0.35	lsd	0.001	saline	2880	48	subacute	NAc	subcortical	camsap1	camsap1	3	3	increase	qlt-0.15	0.15	Benjamini–Hochberg-corrected-q	nr	nr	0.05	Effect size and variation eyeballed from graph. statistics reported as Benjamini–Hochberg-corrected-q		9	2023	37316665	Extended-figure10	na	P98-to-P112	RNAseq	TPM-ratio-to-saline-mean		nr	LSD	0.001	bs-vehicle	camsap1
Nardou	1	mouse	C57BL/6J	P98-to-P112	male	RNAseq	TPMratio	nr	lsd	0.001	saline	2880	48	subacute	NAc	subcortical	cavin1	cavin1	3	3	increase	qlt-0.1	0.1	Benjamini–Hochberg-corrected-q	nr	nr	nr	Effect size from heat map was not estimated. Statistical test was done in comparison to closed period treatments. Increase and decrease was eyeballed in comparison to saline groups		10	2023	37316665	fig. 5	na	P98-to-P112	RNAseq	TPM-ratio-to-row-mean		nr	LSD	0.001	bs-vehicle	cavin1
Nardou	1	mouse	C57BL/6J	P98-to-P112	male	RNAseq	TPMratio	nr	lsd	0.001	saline	2880	48	subacute	NAc	subcortical	ccm2l	ccm2l	3	3	increase	qlt-0.1	0.1	Benjamini–Hochberg-corrected-q	nr	nr	nr	Effect size from heat map was not estimated. Statistical test was done in comparison to closed period treatments. Increase and decrease was eyeballed in comparison to saline groups		11	2023	37316665	fig. 5	na	P98-to-P112	RNAseq	TPM-ratio-to-row-mean		nr	LSD	0.001	bs-vehicle	ccm2l
Nardou	1	mouse	C57BL/6J	P98-to-P112	male	RNAseq	TPMratio	nr	lsd	0.001	saline	2880	48	subacute	NAc	subcortical	fos	cfos	3	3	decrease	qlt-0.1	0.1	Benjamini–Hochberg-corrected-q	nr	nr	nr	Effect size from heat map was not estimated. Statistical test was done in comparison to closed period treatments. Increase and decrease was eyeballed in comparison to saline groups		12	2023	37316665	fig. 5	na	P98-to-P112	RNAseq	TPM-ratio-to-row-mean		nr	LSD	0.001	bs-vehicle	fos
Nardou	2	mouse	C57BL/6J	P98-to-P112	male	RNAseq	TPMratio	0.4	lsd	0.001	saline	2880	48	subacute	NAc	subcortical	chd8	chd8	3	3	increase	qlt-0.15	0.15	Benjamini–Hochberg-corrected-q	nr	nr	0.05	Effect size and variation eyeballed from graph. statistics reported as Benjamini–Hochberg-corrected-q		16	2023	37316665	Extended-figure10	na	P98-to-P112	RNAseq	TPM-ratio-to-saline-mean		nr	LSD	0.001	bs-vehicle	chd8
Nardou	1	mouse	C57BL/6J	P98-to-P112	male	RNAseq	TPMratio	-1.25	lsd	0.001	saline	2880	48	subacute	NAc	subcortical	crcx4	crcx4	3	3	decrease	qlt-0.1	0.1	Benjamini–Hochberg-corrected-q	nr	nr	0.1	Effect size and variation eyeballed from graph. statistics reported as Benjamini–Hochberg-corrected-q		4	2023	37316665	fig. 5	na	P98-to-P112	RNAseq	TPM-ratio-to-saline-mean		nr	LSD	0.001	bs-vehicle	cxcr4
Nardou	1	mouse	C57BL/6J	P98-to-P112	male	RNAseq	TPMratio	nr	lsd	0.001	saline	2880	48	subacute	NAc	subcortical	dusp1	dusp1	3	3	decrease	qlt-0.1	0.1	Benjamini–Hochberg-corrected-q	nr	nr	nr	Effect size from heat map was not estimated. Statistical test was done in comparison to closed period treatments. Increase and decrease was eyeballed in comparison to saline groups		5	2023	37316665	fig. 5	na	P98-to-P112	RNAseq	TPM-ratio-to-row-mean		nr	LSD	0.001	bs-vehicle	dusp1
Nardou	1	mouse	C57BL/6J	P98-to-P112	male	RNAseq	TPMratio	nr	lsd	0.001	saline	2880	48	subacute	NAc	subcortical	ehd2	ehd2	3	3	increase	qlt-0.1	0.1	Benjamini–Hochberg-corrected-q	nr	nr	nr	Effect size from heat map was not estimated. Statistical test was done in comparison to closed period treatments. Increase and decrease was eyeballed in comparison to saline groups		6	2023	37316665	fig. 5	na	P98-to-P112	RNAseq	TPM-ratio-to-row-mean		nr	LSD	0.001	bs-vehicle	ehd2
Nardou	2	mouse	C57BL/6J	P98-to-P112	male	RNAseq	TPMratio	0.35	lsd	0.001	saline	2880	48	subacute	NAc	subcortical	eif4g	eif4g	3	3	increase	qlt-0.15	0.15	Benjamini–Hochberg-corrected-q	nr	nr	0.1	Effect size and variation eyeballed from graph. statistics reported as Benjamini–Hochberg-corrected-q		14	2023	37316665	Extended-figure10	na	P98-to-P112	RNAseq	TPM-ratio-to-saline-mean		nr	LSD	0.001	bs-vehicle	eif4g1
Nardou	1	mouse	C57BL/6J	P98-to-P112	male	RNAseq	TPMratio	nr	lsd	0.001	saline	2880	48	subacute	NAc	subcortical	eng	eng	3	3	increase	qlt-0.1	0.1	Benjamini–Hochberg-corrected-q	nr	nr	nr	Effect size from heat map was not estimated. Statistical test was done in comparison to closed period treatments. Increase and decrease was eyeballed in comparison to saline groups		15	2023	37316665	fig. 5	na	P98-to-P112	RNAseq	TPM-ratio-to-row-mean		nr	LSD	0.001	bs-vehicle	eng
Nardou	1	mouse	C57BL/6J	P98-to-P112	male	RNAseq	TPMratio	nr	lsd	0.001	saline	2880	48	subacute	NAc	subcortical	ephb4	ephb4	3	3	increase	qlt-0.1	0.1	Benjamini–Hochberg-corrected-q	nr	nr	nr	Effect size from heat map was not estimated. Statistical test was done in comparison to closed period treatments. Increase and decrease was eyeballed in comparison to saline groups		16	2023	37316665	fig. 5	na	P98-to-P112	RNAseq	TPM-ratio-to-row-mean		nr	LSD	0.001	bs-vehicle	ephb4
Nardou	1	mouse	C57BL/6J	P98-to-P112	male	RNAseq	TPMratio	nr	lsd	0.001	saline	2880	48	subacute	NAc	subcortical	flt4	flt4	3	3	increase	qlt-0.1	0.1	Benjamini–Hochberg-corrected-q	nr	nr	nr	Effect size from heat map was not estimated. Statistical test was done in comparison to closed period treatments. Increase and decrease was eyeballed in comparison to saline groups		17	2023	37316665	fig. 5	na	P98-to-P112	RNAseq	TPM-ratio-to-row-mean		nr	LSD	0.001	bs-vehicle	flt4
Nardou	1	mouse	C57BL/6J	P98-to-P112	male	RNAseq	TPMratio	0.6	lsd	0.001	saline	2880	48	subacute	NAc	subcortical	Fn1	fn1	3	3	increase	qlt-0.1	0.1	Benjamini–Hochberg-corrected-q	nr	nr	0.1	Effect size and variation eyeballed from graph. statistics reported as Benjamini–Hochberg-corrected-q		1	2023	37316665	fig. 5	na	P98-to-P112	RNAseq	TPM-ratio-to-saline-mean		nr	LSD	0.001	bs-vehicle	Fn1
Nardou	1	mouse	C57BL/6J	P98-to-P112	male	RNAseq	TPMratio	nr	lsd	0.001	saline	2880	48	subacute	NAc	subcortical	gata2	gata2	3	3	increase	qlt-0.1	0.1	Benjamini–Hochberg-corrected-q	nr	nr	nr	Effect size from heat map was not estimated. Statistical test was done in comparison to closed period treatments. Increase and decrease was eyeballed in comparison to saline groups		2	2023	37316665	fig. 5	na	P98-to-P112	RNAseq	TPM-ratio-to-row-mean		nr	LSD	0.001	bs-vehicle	gata2a
Nardou	2	mouse	C57BL/6J	P98-to-P112	male	RNAseq	TPMratio	0.4	lsd	0.001	saline	2880	48	subacute	NAc	subcortical	gprasp1	gprasp1	3	3	increase	qlt-0.15	0.15	Benjamini–Hochberg-corrected-q	nr	nr	0.05	Effect size and variation eyeballed from graph. statistics reported as Benjamini–Hochberg-corrected-q		10	2023	37316665	Extended-figure10	na	P98-to-P112	RNAseq	TPM-ratio-to-saline-mean		nr	LSD	0.001	bs-vehicle	gprasp1
Nardou	1	mouse	C57BL/6J	P98-to-P112	male	RNAseq	TPMratio	nr	lsd	0.001	saline	2880	48	subacute	NAc	subcortical	hif3a	hif3a	3	3	increase	qlt-0.1	0.1	Benjamini–Hochberg-corrected-q	nr	nr	nr	Effect size from heat map was not estimated. Statistical test was done in comparison to closed period treatments. Increase and decrease was eyeballed in comparison to saline groups		11	2023	37316665	fig. 5	na	P98-to-P112	RNAseq	TPM-ratio-to-row-mean		nr	LSD	0.001	bs-vehicle	hif3a
Nardou	1	mouse	C57BL/6J	P98-to-P112	male	RNAseq	TPMratio	nr	lsd	0.001	saline	2880	48	subacute	NAc	subcortical	hspa12b	hspa12b	3	3	increase	qlt-0.1	0.1	Benjamini–Hochberg-corrected-q	nr	nr	nr	Effect size from heat map was not estimated. Statistical test was done in comparison to closed period treatments. Increase and decrease was eyeballed in comparison to saline groups		12	2023	37316665	fig. 5	na	P98-to-P112	RNAseq	TPM-ratio-to-row-mean		nr	LSD	0.001	bs-vehicle	hspa12b
Nardou	1	mouse	C57BL/6J	P98-to-P112	male	RNAseq	TPMratio	nr	lsd	0.001	saline	2880	48	subacute	NAc	subcortical	inhbb	inhbb	3	3	decrease	qlt-0.1	0.1	Benjamini–Hochberg-corrected-q	nr	nr	nr	Effect size from heat map was not estimated. Statistical test was done in comparison to closed period treatments. Increase and decrease was eyeballed in comparison to saline groups		13	2023	37316665	fig. 5	na	P98-to-P112	RNAseq	TPM-ratio-to-row-mean		nr	LSD	0.001	bs-vehicle	inhbb
Nardou	1	mouse	C57BL/6J	P98-to-P112	male	RNAseq	TPMratio	nr	lsd	0.001	saline	2880	48	subacute	NAc	subcortical	junB	junb	3	3	decrease	qlt-0.1	0.1	Benjamini–Hochberg-corrected-q	nr	nr	nr	Effect size from heat map was not estimated. Statistical test was done in comparison to closed period treatments. Increase and decrease was eyeballed in comparison to saline groups		14	2023	37316665	fig. 5	na	P98-to-P112	RNAseq	TPM-ratio-to-row-mean		nr	LSD	0.001	bs-vehicle	junB
Nardou	1	mouse	C57BL/6J	P98-to-P112	male	RNAseq	TPMratio	nr	lsd	0.001	saline	2880	48	subacute	NAc	subcortical	lamc3	lamc3	3	3	increase	qlt-0.1	0.1	Benjamini–Hochberg-corrected-q	nr	nr	nr	Effect size from heat map was not estimated. Statistical test was done in comparison to closed period treatments. Increase and decrease was eyeballed in comparison to saline groups		15	2023	37316665	fig. 5	na	P98-to-P112	RNAseq	TPM-ratio-to-row-mean		nr	LSD	0.001	bs-vehicle	lamc3
Nardou	1	mouse	C57BL/6J	P98-to-P112	male	RNAseq	TPMratio	-0.15	lsd	0.001	saline	2880	48	subacute	NAc	subcortical	Mmp16	mmp16	3	3	decrease	qlt-0.1	0.1	Benjamini–Hochberg-corrected-q	nr	nr	0.15	Effect size and variation eyeballed from graph. statistics reported as Benjamini–Hochberg-corrected-q		2	2023	37316665	fig. 5	na	P98-to-P112	RNAseq	TPM-ratio-to-saline-mean		nr	LSD	0.001	bs-vehicle	Mmp16
Nardou	1	mouse	C57BL/6J	P98-to-P112	male	RNAseq	TPMratio	nr	lsd	0.001	saline	2880	48	subacute	NAc	subcortical	mrtfa	mrtfa	3	3	increase	qlt-0.1	0.1	Benjamini–Hochberg-corrected-q	nr	nr	nr	Effect size from heat map was not estimated. Statistical test was done in comparison to closed period treatments. Increase and decrease was eyeballed in comparison to saline groups		3	2023	37316665	fig. 5	na	P98-to-P112	RNAseq	TPM-ratio-to-row-mean		nr	LSD	0.001	bs-vehicle	mkl1
Nardou	2	mouse	C57BL/6J	P98-to-P112	male	RNAseq	TPMratio	0.38	lsd	0.001	saline	2880	48	subacute	NAc	subcortical	myo16	myo16	3	3	increase	qlt-0.15	0.15	Benjamini–Hochberg-corrected-q	nr	nr	0.15	Effect size and variation eyeballed from graph. statistics reported as Benjamini–Hochberg-corrected-q		15	2023	37316665	Extended-figure10	na	P98-to-P112	RNAseq	TPM-ratio-to-saline-mean		nr	LSD	0.001	bs-vehicle	myo16
Nardou	1	mouse	C57BL/6J	P98-to-P112	male	RNAseq	TPMratio	nr	lsd	0.001	saline	2880	48	subacute	NAc	subcortical	Nes	nes	3	3	increase	qlt-0.1	0.1	Benjamini–Hochberg-corrected-q	nr	nr	nr	Effect size from heat map was not estimated. Statistical test was done in comparison to closed period treatments. Increase and decrease was eyeballed in comparison to saline groups		16	2023	37316665	fig. 5	na	P98-to-P112	RNAseq	TPM-ratio-to-row-mean		nr	LSD	0.001	bs-vehicle	Nes
Nardou	1	mouse	C57BL/6J	P98-to-P112	male	RNAseq	TPMratio	nr	lsd	0.001	saline	2880	48	subacute	NAc	subcortical	nfil3	nfil3	3	3	decrease	qlt-0.1	0.1	Benjamini–Hochberg-corrected-q	nr	nr	nr	Effect size from heat map was not estimated. Statistical test was done in comparison to closed period treatments. Increase and decrease was eyeballed in comparison to saline groups		17	2023	37316665	fig. 5	na	P98-to-P112	RNAseq	TPM-ratio-to-row-mean		nr	LSD	0.001	bs-vehicle	nfil3
Nardou	1	mouse	C57BL/6J	P98-to-P112	male	RNAseq	TPMratio	nr	lsd	0.001	saline	2880	48	subacute	NAc	subcortical	nos3	nos3	3	3	increase	qlt-0.1	0.1	Benjamini–Hochberg-corrected-q	nr	nr	nr	Effect size from heat map was not estimated. Statistical test was done in comparison to closed period treatments. Increase and decrease was eyeballed in comparison to saline groups		18	2023	37316665	fig. 5	na	P98-to-P112	RNAseq	TPM-ratio-to-row-mean		nr	LSD	0.001	bs-vehicle	nos3
Nardou	1	mouse	C57BL/6J	P98-to-P112	male	RNAseq	TPMratio	0.3	lsd	0.001	saline	2880	48	subacute	NAc	subcortical	nostrin	nostrin	3	3	increase	qlt-0.1	0.1	Benjamini–Hochberg-corrected-q	nr	nr	0.05	Effect size and variation eyeballed from graph. statistics reported as Benjamini–Hochberg-corrected-q		8	2023	37316665	fig. 5	na	P98-to-P112	RNAseq	TPM-ratio-to-saline-mean		nr	LSD	0.001	bs-vehicle	nostrin
Nardou	1	mouse	C57BL/6J	P98-to-P112	male	RNAseq	TPMratio	nr	lsd	0.001	saline	2880	48	subacute	NAc	subcortical	odf2	odf2	3	3	increase	qlt-0.1	0.1	Benjamini–Hochberg-corrected-q	nr	nr	nr	Effect size from heat map was not estimated. Statistical test was done in comparison to closed period treatments. Increase and decrease was eyeballed in comparison to saline groups		9	2023	37316665	fig. 5	na	P98-to-P112	RNAseq	TPM-ratio-to-row-mean		nr	LSD	0.001	bs-vehicle	odf2
Nardou	1	mouse	C57BL/6J	P98-to-P112	male	RNAseq	TPMratio	nr	lsd	0.001	saline	2880	48	subacute	NAc	subcortical	paqr5	paqr5	3	3	increase	qlt-0.1	0.1	Benjamini–Hochberg-corrected-q	nr	nr	nr	Effect size from heat map was not estimated. Statistical test was done in comparison to closed period treatments. Increase and decrease was eyeballed in comparison to saline groups		10	2023	37316665	fig. 5	na	P98-to-P112	RNAseq	TPM-ratio-to-row-mean		nr	LSD	0.001	bs-vehicle	paqr5
Nardou	1	mouse	C57BL/6J	P98-to-P112	male	RNAseq	TPMratio	nr	lsd	0.001	saline	2880	48	subacute	NAc	subcortical	plin4	plin4	3	3	increase	qlt-0.1	0.1	Benjamini–Hochberg-corrected-q	nr	nr	nr	Effect size from heat map was not estimated. Statistical test was done in comparison to closed period treatments. Increase and decrease was eyeballed in comparison to saline groups		11	2023	37316665	fig. 5	na	P98-to-P112	RNAseq	TPM-ratio-to-row-mean		nr	LSD	0.001	bs-vehicle	plin4
Nardou	1	mouse	C57BL/6J	P98-to-P112	male	RNAseq	TPMratio	nr	lsd	0.001	saline	2880	48	subacute	NAc	subcortical	pltp	pltp	3	3	increase	qlt-0.1	0.1	Benjamini–Hochberg-corrected-q	nr	nr	nr	Effect size from heat map was not estimated. Statistical test was done in comparison to closed period treatments. Increase and decrease was eyeballed in comparison to saline groups		12	2023	37316665	fig. 5	na	P98-to-P112	RNAseq	TPM-ratio-to-row-mean		nr	LSD	0.001	bs-vehicle	pltp
Nardou	1	mouse	C57BL/6J	P98-to-P112	male	RNAseq	TPMratio	nr	lsd	0.001	saline	2880	48	subacute	NAc	subcortical	podxl	podxl	3	3	increase	qlt-0.1	0.1	Benjamini–Hochberg-corrected-q	nr	nr	nr	Effect size from heat map was not estimated. Statistical test was done in comparison to closed period treatments. Increase and decrease was eyeballed in comparison to saline groups		13	2023	37316665	fig. 5	na	P98-to-P112	RNAseq	TPM-ratio-to-row-mean		nr	LSD	0.001	bs-vehicle	podxl
Nardou	1	mouse	C57BL/6J	P98-to-P112	male	RNAseq	TPMratio	nr	lsd	0.001	saline	2880	48	subacute	NAc	subcortical	ptar1	ptar1	3	3	decrease	qlt-0.1	0.1	Benjamini–Hochberg-corrected-q	nr	nr	nr	Effect size from heat map was not estimated. Statistical test was done in comparison to closed period treatments. Increase and decrease was eyeballed in comparison to saline groups		14	2023	37316665	fig. 5	na	P98-to-P112	RNAseq	TPM-ratio-to-row-mean		nr	LSD	0.001	bs-vehicle	ptar1
Nardou	1	mouse	C57BL/6J	P98-to-P112	male	RNAseq	TPMratio	nr	lsd	0.001	saline	2880	48	subacute	NAc	subcortical	ptch2	ptch2	3	3	increase	qlt-0.1	0.1	Benjamini–Hochberg-corrected-q	nr	nr	nr	Effect size from heat map was not estimated. Statistical test was done in comparison to closed period treatments. Increase and decrease was eyeballed in comparison to saline groups		15	2023	37316665	fig. 5	na	P98-to-P112	RNAseq	TPM-ratio-to-row-mean		nr	LSD	0.001	bs-vehicle	ptch2
Nardou	1	mouse	C57BL/6J	P98-to-P112	male	RNAseq	TPMratio	nr	lsd	0.001	saline	2880	48	subacute	NAc	subcortical	radil	radil	3	3	increase	qlt-0.1	0.1	Benjamini–Hochberg-corrected-q	nr	nr	nr	Effect size from heat map was not estimated. Statistical test was done in comparison to closed period treatments. Increase and decrease was eyeballed in comparison to saline groups		16	2023	37316665	fig. 5	na	P98-to-P112	RNAseq	TPM-ratio-to-row-mean		nr	LSD	0.001	bs-vehicle	radil
Nardou	1	mouse	C57BL/6J	P98-to-P112	male	RNAseq	TPMratio	nr	lsd	0.001	saline	2880	48	subacute	NAc	subcortical	rasa2	rasa2	3	3	decrease	qlt-0.1	0.1	Benjamini–Hochberg-corrected-q	nr	nr	nr	Effect size from heat map was not estimated. Statistical test was done in comparison to closed period treatments. Increase and decrease was eyeballed in comparison to saline groups		17	2023	37316665	fig. 5	na	P98-to-P112	RNAseq	TPM-ratio-to-row-mean		nr	LSD	0.001	bs-vehicle	rasa2
Nardou	1	mouse	C57BL/6J	P98-to-P112	male	RNAseq	TPMratio	0.48	lsd	0.001	saline	2880	48	subacute	NAc	subcortical	robo4	robo4	3	3	increase	qlt-0.1	0.1	Benjamini–Hochberg-corrected-q	nr	nr	0.1	Effect size and variation eyeballed from graph. statistics reported as Benjamini–Hochberg-corrected-q		7	2023	37316665	fig. 5	na	P98-to-P112	RNAseq	TPM-ratio-to-saline-mean		nr	LSD	0.001	bs-vehicle	robo4
Nardou	1	mouse	C57BL/6J	P98-to-P112	male	RNAseq	TPMratio	nr	lsd	0.001	saline	2880	48	subacute	NAc	subcortical	rpl31-ps13	rpl31ps13	3	3	decrease	qlt-0.1	0.1	Benjamini–Hochberg-corrected-q	nr	nr	nr	Effect size from heat map was not estimated. Statistical test was done in comparison to closed period treatments. Increase and decrease was eyeballed in comparison to saline groups		8	2023	37316665	fig. 5	na	P98-to-P112	RNAseq	TPM-ratio-to-row-mean		nr	LSD	0.001	bs-vehicle	rpl31-ps13
Nardou	1	mouse	C57BL/6J	P98-to-P112	male	RNAseq	TPMratio	nr	lsd	0.001	saline	2880	48	subacute	NAc	subcortical	sema3g	sema3g	3	3	increase	qlt-0.1	0.1	Benjamini–Hochberg-corrected-q	nr	nr	nr	Effect size from heat map was not estimated. Statistical test was done in comparison to closed period treatments. Increase and decrease was eyeballed in comparison to saline groups		9	2023	37316665	fig. 5	na	P98-to-P112	RNAseq	TPM-ratio-to-row-mean		nr	LSD	0.001	bs-vehicle	sema3g
Nardou	1	mouse	C57BL/6J	P98-to-P112	male	RNAseq	TPMratio	nr	lsd	0.001	saline	2880	48	subacute	NAc	subcortical	slc2a1	slc2a1	3	3	increase	qlt-0.1	0.1	Benjamini–Hochberg-corrected-q	nr	nr	nr	Effect size from heat map was not estimated. Statistical test was done in comparison to closed period treatments. Increase and decrease was eyeballed in comparison to saline groups		10	2023	37316665	fig. 5	na	P98-to-P112	RNAseq	TPM-ratio-to-row-mean		nr	LSD	0.001	bs-vehicle	slc2a1
Nardou	1	mouse	C57BL/6J	P98-to-P112	male	RNAseq	TPMratio	nr	lsd	0.001	saline	2880	48	subacute	NAc	subcortical	slc52a3	slc52a3	3	3	increase	qlt-0.1	0.1	Benjamini–Hochberg-corrected-q	nr	nr	nr	Effect size from heat map was not estimated. Statistical test was done in comparison to closed period treatments. Increase and decrease was eyeballed in comparison to saline groups		11	2023	37316665	fig. 5	na	P98-to-P112	RNAseq	TPM-ratio-to-row-mean		nr	LSD	0.001	bs-vehicle	slc52a3
Nardou	1	mouse	C57BL/6J	P98-to-P112	male	RNAseq	TPMratio	nr	lsd	0.001	saline	2880	48	subacute	NAc	subcortical	slc6a6	slc6a6	3	3	increase	qlt-0.1	0.1	Benjamini–Hochberg-corrected-q	nr	nr	nr	Effect size from heat map was not estimated. Statistical test was done in comparison to closed period treatments. Increase and decrease was eyeballed in comparison to saline groups		12	2023	37316665	fig. 5	na	P98-to-P112	RNAseq	TPM-ratio-to-row-mean		nr	LSD	0.001	bs-vehicle	slc6a6
Nardou	1	mouse	C57BL/6J	P98-to-P112	male	RNAseq	TPMratio	nr	lsd	0.001	saline	2880	48	subacute	NAc	subcortical	slfn5	slfn5	3	3	increase	qlt-0.1	0.1	Benjamini–Hochberg-corrected-q	nr	nr	nr	Effect size from heat map was not estimated. Statistical test was done in comparison to closed period treatments. Increase and decrease was eyeballed in comparison to saline groups		13	2023	37316665	fig. 5	na	P98-to-P112	RNAseq	TPM-ratio-to-row-mean		nr	LSD	0.001	bs-vehicle	slfn5
Nardou	1	mouse	C57BL/6J	P98-to-P112	male	RNAseq	TPMratio	nr	lsd	0.001	saline	2880	48	subacute	NAc	subcortical	smtn	smtn	3	3	increase	qlt-0.1	0.1	Benjamini–Hochberg-corrected-q	nr	nr	nr	Effect size from heat map was not estimated. Statistical test was done in comparison to closed period treatments. Increase and decrease was eyeballed in comparison to saline groups		14	2023	37316665	fig. 5	na	P98-to-P112	RNAseq	TPM-ratio-to-row-mean		nr	LSD	0.001	bs-vehicle	smtn
Nardou	1	mouse	C57BL/6J	P98-to-P112	male	RNAseq	TPMratio	nr	lsd	0.001	saline	2880	48	subacute	NAc	subcortical	snapc4	snapc4	3	3	increase	qlt-0.1	0.1	Benjamini–Hochberg-corrected-q	nr	nr	nr	Effect size from heat map was not estimated. Statistical test was done in comparison to closed period treatments. Increase and decrease was eyeballed in comparison to saline groups		15	2023	37316665	fig. 5	na	P98-to-P112	RNAseq	TPM-ratio-to-row-mean		nr	LSD	0.001	bs-vehicle	snapc4
Nardou	1	mouse	C57BL/6J	P98-to-P112	male	RNAseq	TPMratio	nr	lsd	0.001	saline	2880	48	subacute	NAc	subcortical	st6galnac2	st6galnac2	3	3	increase	qlt-0.1	0.1	Benjamini–Hochberg-corrected-q	nr	nr	nr	Effect size from heat map was not estimated. Statistical test was done in comparison to closed period treatments. Increase and decrease was eyeballed in comparison to saline groups		16	2023	37316665	fig. 5	na	P98-to-P112	RNAseq	TPM-ratio-to-row-mean		nr	LSD	0.001	bs-vehicle	st6galnac2
Nardou	1	mouse	C57BL/6J	P98-to-P112	male	RNAseq	TPMratio	nr	lsd	0.001	saline	2880	48	subacute	NAc	subcortical	stab1	stab1	3	3	increase	qlt-0.1	0.1	Benjamini–Hochberg-corrected-q	nr	nr	nr	Effect size from heat map was not estimated. Statistical test was done in comparison to closed period treatments. Increase and decrease was eyeballed in comparison to saline groups		17	2023	37316665	fig. 5	na	P98-to-P112	RNAseq	TPM-ratio-to-row-mean		nr	LSD	0.001	bs-vehicle	stab1
Nardou	1	mouse	C57BL/6J	P98-to-P112	male	RNAseq	TPMratio	nr	lsd	0.001	saline	2880	48	subacute	NAc	subcortical	tcf23	tcf23	3	3	increase	qlt-0.1	0.1	Benjamini–Hochberg-corrected-q	nr	nr	nr	Effect size from heat map was not estimated. Statistical test was done in comparison to closed period treatments. Increase and decrease was eyeballed in comparison to saline groups		18	2023	37316665	fig. 5	na	P98-to-P112	RNAseq	TPM-ratio-to-row-mean		nr	LSD	0.001	bs-vehicle	tcf23
Nardou	1	mouse	C57BL/6J	P98-to-P112	male	RNAseq	TPMratio	nr	lsd	0.001	saline	2880	48	subacute	NAc	subcortical	tead4	tead4	3	3	increase	qlt-0.1	0.1	Benjamini–Hochberg-corrected-q	nr	nr	nr	Effect size from heat map was not estimated. Statistical test was done in comparison to closed period treatments. Increase and decrease was eyeballed in comparison to saline groups		19	2023	37316665	fig. 5	na	P98-to-P112	RNAseq	TPM-ratio-to-row-mean		nr	LSD	0.001	bs-vehicle	tead4
Nardou	1	mouse	C57BL/6J	P98-to-P112	male	RNAseq	TPMratio	nr	lsd	0.001	saline	2880	48	subacute	NAc	subcortical	tent5a	tent5a	3	3	decrease	qlt-0.1	0.1	Benjamini–Hochberg-corrected-q	nr	nr	nr	Effect size from heat map was not estimated. Statistical test was done in comparison to closed period treatments. Increase and decrease was eyeballed in comparison to saline groups		20	2023	37316665	fig. 5	na	P98-to-P112	RNAseq	TPM-ratio-to-row-mean		nr	LSD	0.001	bs-vehicle	tent5a
Nardou	1	mouse	C57BL/6J	P98-to-P112	male	RNAseq	TPMratio	nr	lsd	0.001	saline	2880	48	subacute	NAc	subcortical	tie1	tie1	3	3	increase	qlt-0.1	0.1	Benjamini–Hochberg-corrected-q	nr	nr	nr	Effect size from heat map was not estimated. Statistical test was done in comparison to closed period treatments. Increase and decrease was eyeballed in comparison to saline groups		21	2023	37316665	fig. 5	na	P98-to-P112	RNAseq	TPM-ratio-to-row-mean		nr	LSD	0.001	bs-vehicle	tie1
Nardou	1	mouse	C57BL/6J	P98-to-P112	male	RNAseq	TPMratio	0.45	lsd	0.001	saline	2880	48	subacute	NAc	subcortical	Tinagl1	tinagl1	3	3	increase	qlt-0.1	0.1	Benjamini–Hochberg-corrected-q	nr	nr	0.05	Effect size and variation eyeballed from graph. statistics reported as Benjamini–Hochberg-corrected-q		5	2023	37316665	fig. 5	na	P98-to-P112	RNAseq	TPM-ratio-to-saline-mean		nr	LSD	0.001	bs-vehicle	Tinagl1
Nardou	1	mouse	C57BL/6J	P98-to-P112	male	RNAseq	TPMratio	nr	lsd	0.001	saline	2880	48	subacute	NAc	subcortical	trim59	trim59	3	3	decrease	qlt-0.1	0.1	Benjamini–Hochberg-corrected-q	nr	nr	nr	Effect size from heat map was not estimated. Statistical test was done in comparison to closed period treatments. Increase and decrease was eyeballed in comparison to saline groups		6	2023	37316665	fig. 5	na	P98-to-P112	RNAseq	TPM-ratio-to-row-mean		nr	LSD	0.001	bs-vehicle	trim59
Nardou	1	mouse	C57BL/6J	P98-to-P112	male	RNAseq	TPMratio	0.35	lsd	0.001	saline	2880	48	subacute	NAc	subcortical	Trpv4	trpv4	3	3	increase	qlt-0.1	0.1	Benjamini–Hochberg-corrected-q	nr	nr	0.25	Effect size and variation eyeballed from graph. statistics reported as Benjamini–Hochberg-corrected-q		3	2023	37316665	fig. 5	na	P98-to-P112	RNAseq	TPM-ratio-to-saline-mean		nr	LSD	0.001	bs-vehicle	Trpv4
Nardou	2	mouse	C57BL/6J	P98-to-P112	male	RNAseq	TPMratio	0.4	lsd	0.001	saline	2880	48	subacute	NAc	subcortical	ube4b	ube4b	3	3	increase	qlt-0.15	0.15	Benjamini–Hochberg-corrected-q	nr	nr	0.05	Effect size and variation eyeballed from graph. statistics reported as Benjamini–Hochberg-corrected-q		12	2023	37316665	Extended-figure10	na	P98-to-P112	RNAseq	TPM-ratio-to-saline-mean		nr	LSD	0.001	bs-vehicle	ube4b
Nardou	1	mouse	C57BL/6J	P98-to-P112	male	RNAseq	TPMratio	nr	lsd	0.001	saline	2880	48	subacute	NAc	subcortical	ube4b	ube4b	3	3	increase	qlt-0.1	0.1	Benjamini–Hochberg-corrected-q	nr	nr	nr	Effect size from heat map was not estimated. Statistical test was done in comparison to closed period treatments. Increase and decrease was eyeballed in comparison to saline groups		13	2023	37316665	fig. 5	na	P98-to-P112	RNAseq	TPM-ratio-to-row-mean		nr	LSD	0.001	bs-vehicle	ube4b
Nardou	2	mouse	C57BL/6J	P98-to-P112	male	RNAseq	TPMratio	0.4	lsd	0.001	saline	2880	48	subacute	NAc	subcortical	ubr4	ubr4	3	3	increase	qlt-0.15	0.15	Benjamini–Hochberg-corrected-q	nr	nr	0.1	Effect size and variation eyeballed from graph. statistics reported as Benjamini–Hochberg-corrected-q		11	2023	37316665	Extended-figure10	na	P98-to-P112	RNAseq	TPM-ratio-to-saline-mean		nr	LSD	0.001	bs-vehicle	ubr4
Nardou	1	mouse	C57BL/6J	P98-to-P112	male	RNAseq	TPMratio	nr	lsd	0.001	saline	2880	48	subacute	NAc	subcortical	vmn2r44	vmn2r44	3	3	decrease	qlt-0.1	0.1	Benjamini–Hochberg-corrected-q	nr	nr	nr	Effect size from heat map was not estimated. Statistical test was done in comparison to closed period treatments. Increase and decrease was eyeballed in comparison to saline groups		12	2023	37316665	fig. 5	na	P98-to-P112	RNAseq	TPM-ratio-to-row-mean		nr	LSD	0.001	bs-vehicle	vmn2r44
Nardou	1	mouse	C57BL/6J	P98-to-P112	male	RNAseq	TPMratio	nr	lsd	0.001	saline	2880	48	subacute	NAc	subcortical	zbtb-16	zbtb16	3	3	increase	qlt-0.1	0.1	Benjamini–Hochberg-corrected-q	nr	nr	nr	Effect size from heat map was not estimated. Statistical test was done in comparison to closed period treatments. Increase and decrease was eyeballed in comparison to saline groups		13	2023	37316665	fig. 5	na	P98-to-P112	RNAseq	TPM-ratio-to-row-mean		nr	LSD	0.001	bs-vehicle	zbtb16
Nardou	1	mouse	C57BL/6J	P98-to-P112	male	RNAseq	TPMratio	nr	lsd	0.001	saline	2880	48	subacute	NAc	subcortical	zbtd37	zbtd37	3	3	decrease	qlt-0.1	0.1	Benjamini–Hochberg-corrected-q	nr	nr	nr	Effect size from heat map was not estimated. Statistical test was done in comparison to closed period treatments. Increase and decrease was eyeballed in comparison to saline groups		14	2023	37316665	fig. 5	na	P98-to-P112	RNAseq	TPM-ratio-to-row-mean		nr	LSD	0.001	bs-vehicle	ZBTB37
Nardou	2	mouse	C57BL/6J	P98-to-P112	male	RNAseq	TPMratio	nr	lsd	0.002	saline	2881	48.0167	subacute	NAc	subcortical	1700011mo2rik	1700011mo2rik	3	3	increase	qlt-0.15	0.15	Benjamini–Hochberg-corrected-q	nr	nr	nr	Effect size from heat map was not estimated. Statistical test was done in comparison to saline treatments. Increase and decrease was eyeballed in comparison to saline groups		15	2023	37316665	Extended-figure10	na	P98-to-P112	RNAseq	TPM-ratio-to-row-mean		nr	LSD	0.002	bs-vehicle	1700011mo2rik
Nardou	2	mouse	C57BL/6J	P98-to-P112	male	RNAseq	TPMratio	nr	lsd	0.003	saline	2882	48.0333	subacute	NAc	subcortical	chgb	chgb	3	3	increase	qlt-0.16	0.15	Benjamini–Hochberg-corrected-q	nr	nr	nr	Effect size from heat map was not estimated. Statistical test was done in comparison to saline treatments. Increase and decrease was eyeballed in comparison to saline groups		16	2023	37316665	Extended-figure10	na	P98-to-P112	RNAseq	TPM-ratio-to-row-mean		nr	LSD	0.003	bs-vehicle	chgb
Nardou	2	mouse	C57BL/6J	P98-to-P112	male	RNAseq	TPMratio	nr	lsd	0.004	saline	2883	48.05	subacute	NAc	subcortical	hyou1	hyou1	3	3	increase	qlt-0.17	0.15	Benjamini–Hochberg-corrected-q	nr	nr	nr	Effect size from heat map was not estimated. Statistical test was done in comparison to saline treatments. Increase and decrease was eyeballed in comparison to saline groups		17	2023	37316665	Extended-figure10	na	P98-to-P112	RNAseq	TPM-ratio-to-row-mean		nr	LSD	0.004	bs-vehicle	hyou1
Nardou	2	mouse	C57BL/6J	P98-to-P112	male	RNAseq	TPMratio	nr	lsd	0.005	saline	2884	48.0667	subacute	NAc	subcortical	flt4	flt4	3	3	increase	qlt-0.18	0.15	Benjamini–Hochberg-corrected-q	nr	nr	nr	Effect size from heat map was not estimated. Statistical test was done in comparison to saline treatments. Increase and decrease was eyeballed in comparison to saline groups		18	2023	37316665	Extended-figure10	na	P98-to-P112	RNAseq	TPM-ratio-to-row-mean		nr	LSD	0.005	bs-vehicle	flt4
Nardou	2	mouse	C57BL/6J	P98-to-P112	male	RNAseq	TPMratio	nr	lsd	0.006	saline	2885	48.0833	subacute	NAc	subcortical	pecam1	pecam1	3	3	increase	qlt-0.19	0.15	Benjamini–Hochberg-corrected-q	nr	nr	nr	Effect size from heat map was not estimated. Statistical test was done in comparison to saline treatments. Increase and decrease was eyeballed in comparison to saline groups		19	2023	37316665	Extended-figure10	na	P98-to-P112	RNAseq	TPM-ratio-to-row-mean		nr	LSD	0.006	bs-vehicle	pecam1
Nardou	2	mouse	C57BL/6J	P98-to-P112	male	RNAseq	TPMratio	nr	lsd	0.007	saline	2886	48.1	subacute	NAc	subcortical	cgnl1	cgnl1	3	3	increase	qlt-0.20	0.15	Benjamini–Hochberg-corrected-q	nr	nr	nr	Effect size from heat map was not estimated. Statistical test was done in comparison to saline treatments. Increase and decrease was eyeballed in comparison to saline groups		20	2023	37316665	Extended-figure10	na	P98-to-P112	RNAseq	TPM-ratio-to-row-mean		nr	LSD	0.007	bs-vehicle	cgnl1
Nardou	2	mouse	C57BL/6J	P98-to-P112	male	RNAseq	TPMratio	nr	lsd	0.008	saline	2887	48.1167	subacute	NAc	subcortical	sema3g	sema3g	3	3	increase	qlt-0.21	0.15	Benjamini–Hochberg-corrected-q	nr	nr	nr	Effect size from heat map was not estimated. Statistical test was done in comparison to saline treatments. Increase and decrease was eyeballed in comparison to saline groups		21	2023	37316665	Extended-figure10	na	P98-to-P112	RNAseq	TPM-ratio-to-row-mean		nr	LSD	0.008	bs-vehicle	sema3g
Nardou	2	mouse	C57BL/6J	P98-to-P112	male	RNAseq	TPMratio	nr	lsd	0.009	saline	2888	48.1333	subacute	NAc	subcortical	mmrn2	mmrn2	3	3	increase	qlt-0.22	0.15	Benjamini–Hochberg-corrected-q	nr	nr	nr	Effect size from heat map was not estimated. Statistical test was done in comparison to saline treatments. Increase and decrease was eyeballed in comparison to saline groups		22	2023	37316665	Extended-figure10	na	P98-to-P112	RNAseq	TPM-ratio-to-row-mean		nr	LSD	0.009	bs-vehicle	mmrn2
Nardou	2	mouse	C57BL/6J	P98-to-P112	male	RNAseq	TPMratio	nr	lsd	0.010	saline	2889	48.15	subacute	NAc	subcortical	atp1a1	atp1a1	3	3	increase	qlt-0.23	0.15	Benjamini–Hochberg-corrected-q	nr	nr	nr	Effect size from heat map was not estimated. Statistical test was done in comparison to saline treatments. Increase and decrease was eyeballed in comparison to saline groups		23	2023	37316665	Extended-figure10	na	P98-to-P112	RNAseq	TPM-ratio-to-row-mean		nr	LSD	0.010	bs-vehicle	atp1a1
Nardou	2	mouse	C57BL/6J	P98-to-P112	male	RNAseq	TPMratio	nr	lsd	0.011	saline	2890	48.1667	subacute	NAc	subcortical	supt6	supt6	3	3	increase	qlt-0.24	0.15	Benjamini–Hochberg-corrected-q	nr	nr	nr	Effect size from heat map was not estimated. Statistical test was done in comparison to saline treatments. Increase and decrease was eyeballed in comparison to saline groups		24	2023	37316665	Extended-figure10	na	P98-to-P112	RNAseq	TPM-ratio-to-row-mean		nr	LSD	0.011	bs-vehicle	supt6h
Nardou	2	mouse	C57BL/6J	P98-to-P112	male	RNAseq	TPMratio	nr	lsd	0.012	saline	2891	48.1833	subacute	NAc	subcortical	numa1	numa1	3	3	increase	qlt-0.25	0.15	Benjamini–Hochberg-corrected-q	nr	nr	nr	Effect size from heat map was not estimated. Statistical test was done in comparison to saline treatments. Increase and decrease was eyeballed in comparison to saline groups		25	2023	37316665	Extended-figure10	na	P98-to-P112	RNAseq	TPM-ratio-to-row-mean		nr	LSD	0.012	bs-vehicle	numa1
Nardou	2	mouse	C57BL/6J	P98-to-P112	male	RNAseq	TPMratio	nr	lsd	0.013	saline	2892	48.2	subacute	NAc	subcortical	lrp1	lrp1	3	3	increase	qlt-0.26	0.15	Benjamini–Hochberg-corrected-q	nr	nr	nr	Effect size from heat map was not estimated. Statistical test was done in comparison to saline treatments. Increase and decrease was eyeballed in comparison to saline groups		26	2023	37316665	Extended-figure10	na	P98-to-P112	RNAseq	TPM-ratio-to-row-mean		nr	LSD	0.013	bs-vehicle	lrp1
Nardou	2	mouse	C57BL/6J	P98-to-P112	male	RNAseq	TPMratio	nr	lsd	0.014	saline	2893	48.2167	subacute	NAc	subcortical	dnmt1	dnmt1	3	3	increase	qlt-0.27	0.15	Benjamini–Hochberg-corrected-q	nr	nr	nr	Effect size from heat map was not estimated. Statistical test was done in comparison to saline treatments. Increase and decrease was eyeballed in comparison to saline groups		27	2023	37316665	Extended-figure10	na	P98-to-P112	RNAseq	TPM-ratio-to-row-mean		nr	LSD	0.014	bs-vehicle	dnmt1
Nardou	2	mouse	C57BL/6J	P98-to-P112	male	RNAseq	TPMratio	nr	lsd	0.015	saline	2894	48.2333	subacute	NAc	subcortical	cacna2d2	cacna2d2	3	3	increase	qlt-0.28	0.15	Benjamini–Hochberg-corrected-q	nr	nr	nr	Effect size from heat map was not estimated. Statistical test was done in comparison to saline treatments. Increase and decrease was eyeballed in comparison to saline groups		28	2023	37316665	Extended-figure10	na	P98-to-P112	RNAseq	TPM-ratio-to-row-mean		nr	LSD	0.015	bs-vehicle	cacna2d2
Nardou	2	mouse	C57BL/6J	P98-to-P112	male	RNAseq	TPMratio	nr	lsd	0.016	saline	2895	48.25	subacute	NAc	subcortical	gaa	gaa	3	3	increase	qlt-0.29	0.15	Benjamini–Hochberg-corrected-q	nr	nr	nr	Effect size from heat map was not estimated. Statistical test was done in comparison to saline treatments. Increase and decrease was eyeballed in comparison to saline groups		29	2023	37316665	Extended-figure10	na	P98-to-P112	RNAseq	TPM-ratio-to-row-mean		nr	LSD	0.016	bs-vehicle	gaa
Nardou	2	mouse	C57BL/6J	P98-to-P112	male	RNAseq	TPMratio	nr	lsd	0.017	saline	2896	48.2667	subacute	NAc	subcortical	dpp6	dpp6	3	3	increase	qlt-0.30	0.15	Benjamini–Hochberg-corrected-q	nr	nr	nr	Effect size from heat map was not estimated. Statistical test was done in comparison to saline treatments. Increase and decrease was eyeballed in comparison to saline groups		30	2023	37316665	Extended-figure10	na	P98-to-P112	RNAseq	TPM-ratio-to-row-mean		nr	LSD	0.017	bs-vehicle	dpp6
Nardou	2	mouse	C57BL/6J	P98-to-P112	male	RNAseq	TPMratio	nr	lsd	0.018	saline	2897	48.2833	subacute	NAc	subcortical	glg1	glg1	3	3	increase	qlt-0.31	0.15	Benjamini–Hochberg-corrected-q	nr	nr	nr	Effect size from heat map was not estimated. Statistical test was done in comparison to saline treatments. Increase and decrease was eyeballed in comparison to saline groups		31	2023	37316665	Extended-figure10	na	P98-to-P112	RNAseq	TPM-ratio-to-row-mean		nr	LSD	0.018	bs-vehicle	glg1
Nardou	2	mouse	C57BL/6J	P98-to-P112	male	RNAseq	TPMratio	nr	lsd	0.019	saline	2898	48.3	subacute	NAc	subcortical	snrnp200	snrnp200	3	3	increase	qlt-0.32	0.15	Benjamini–Hochberg-corrected-q	nr	nr	nr	Effect size from heat map was not estimated. Statistical test was done in comparison to saline treatments. Increase and decrease was eyeballed in comparison to saline groups		32	2023	37316665	Extended-figure10	na	P98-to-P112	RNAseq	TPM-ratio-to-row-mean		nr	LSD	0.019	bs-vehicle	snrnp200
Nardou	2	mouse	C57BL/6J	P98-to-P112	male	RNAseq	TPMratio	nr	lsd	0.020	saline	2899	48.3167	subacute	NAc	subcortical	ptpro	ptpro	3	3	increase	qlt-0.33	0.15	Benjamini–Hochberg-corrected-q	nr	nr	nr	Effect size from heat map was not estimated. Statistical test was done in comparison to saline treatments. Increase and decrease was eyeballed in comparison to saline groups		33	2023	37316665	Extended-figure10	na	P98-to-P112	RNAseq	TPM-ratio-to-row-mean		nr	LSD	0.020	bs-vehicle	ptpro
